# Supplementary material for: One-Pot Synthesis of (E)-2-(3-Oxoindolin-2-ylidene)-2-arylacetonitriles
Source: MDPI journal article supplement (doi:10.3390/molecules27092808), 2022-04-28
Supplement: s1 [file s1]

## One-pot synthesis of (E)-2-(3-oxoindolin-2-ylidene)-2-arylacetonitriles

Nicolai A. Aksenov<sup>1,\*</sup>, Alexander V. Aksenov<sup>1</sup>, Igor A. Kurenkov<sup>1</sup>, Nikita K. Kirillov<sup>1</sup>, Dmitrii A. Aksenov<sup>1</sup>, Nikolai A. Arutiunov<sup>1</sup>, Daria S. Aksenova<sup>1</sup>, and Michael Rubin<sup>1,2,\*</sup>

<sup>1</sup> Department of Chemistry, North Caucasus Federal University, 1a Pushkin St., 355017 Stavropol, Russia; aaksenov@ncfu.ru (A.V.A.); kurenkman@icloud.com (I.A.K.); lyncheron@gmail.com (N.K.K.); daksenov@ncfu.ru (D.A.A.); naarutiunov@ncfu.ru (N.A.A.); dasha.severilo@gmail.com (D.S.A.)

<sup>2</sup> Department of Chemistry, University of Kansas, 1567 Irving Hill Road, Lawrence, KS 66045, USA;

\* Correspondence: naksenov@ncfu.ru (N.A.A.); mrubin@ku.edu (M.R.)

## Supporting Information

|                                                                                                                                                                     |     |
|---------------------------------------------------------------------------------------------------------------------------------------------------------------------|-----|
| NMR Spectral Charts.....                                                                                                                                            | S2  |
| <sup>1</sup> H and <sup>13</sup> C NMR spectral charts for (E)-2-aryl-2-(3-oxoindolin-2-ylidene)acetonitriles (2aa-2cb).....                                        | S2  |
| <sup>1</sup> H and <sup>13</sup> C NMR spectral charts for (E)-2-(1-hydroxy-3-oxoindolin-2-ylidene)-2-phenylacetonitrile (10ab):.....                               | S48 |
| <sup>1</sup> H and <sup>13</sup> C NMR spectral charts for 4-oxo-2,4-diphenylbutanenitrile (12).....                                                                | S50 |
| <sup>1</sup> H and <sup>13</sup> C NMR spectral charts for 5b-hydroxy-5b,10-dihydrobenzo[4',5']thieno[2',3':3,4]cyclopenta[1,2-b]indole-11-carbonitrile (2ap):..... | S52 |
| HRMS spectral charts.....                                                                                                                                           | S54 |
| HRMS spectral charts for (E)-2-aryl-2-(3-oxoindolin-2-ylidene)acetonitriles (2aa-2cb).....                                                                          | S54 |
| HRMS spectral charts for (E)-2-(1-hydroxy-3-oxoindolin-2-ylidene)-2-phenylacetonitrile (10ab):.....                                                                 | S62 |
| HRMS spectral charts for 4-oxo-2,4-diphenylbutanenitrile (12).....                                                                                                  | S63 |
| HRMS spectral charts for 5b-hydroxy-5b,10-dihydrobenzo[4',5']thieno[2',3':3,4]cyclopenta[1,2-b]indole-11-carbonitrile (2ap):.....                                   | S64 |
| X-Ray crystallography data.....                                                                                                                                     | S65 |
| References.....                                                                                                                                                     | S75 |

**$^1\text{H}$  and  $^{13}\text{C}$  NMR spectral charts for (E)-2-aryl-2-(3-oxoindolin-2-ylidene)acetonitriles (2aa-2cb)**

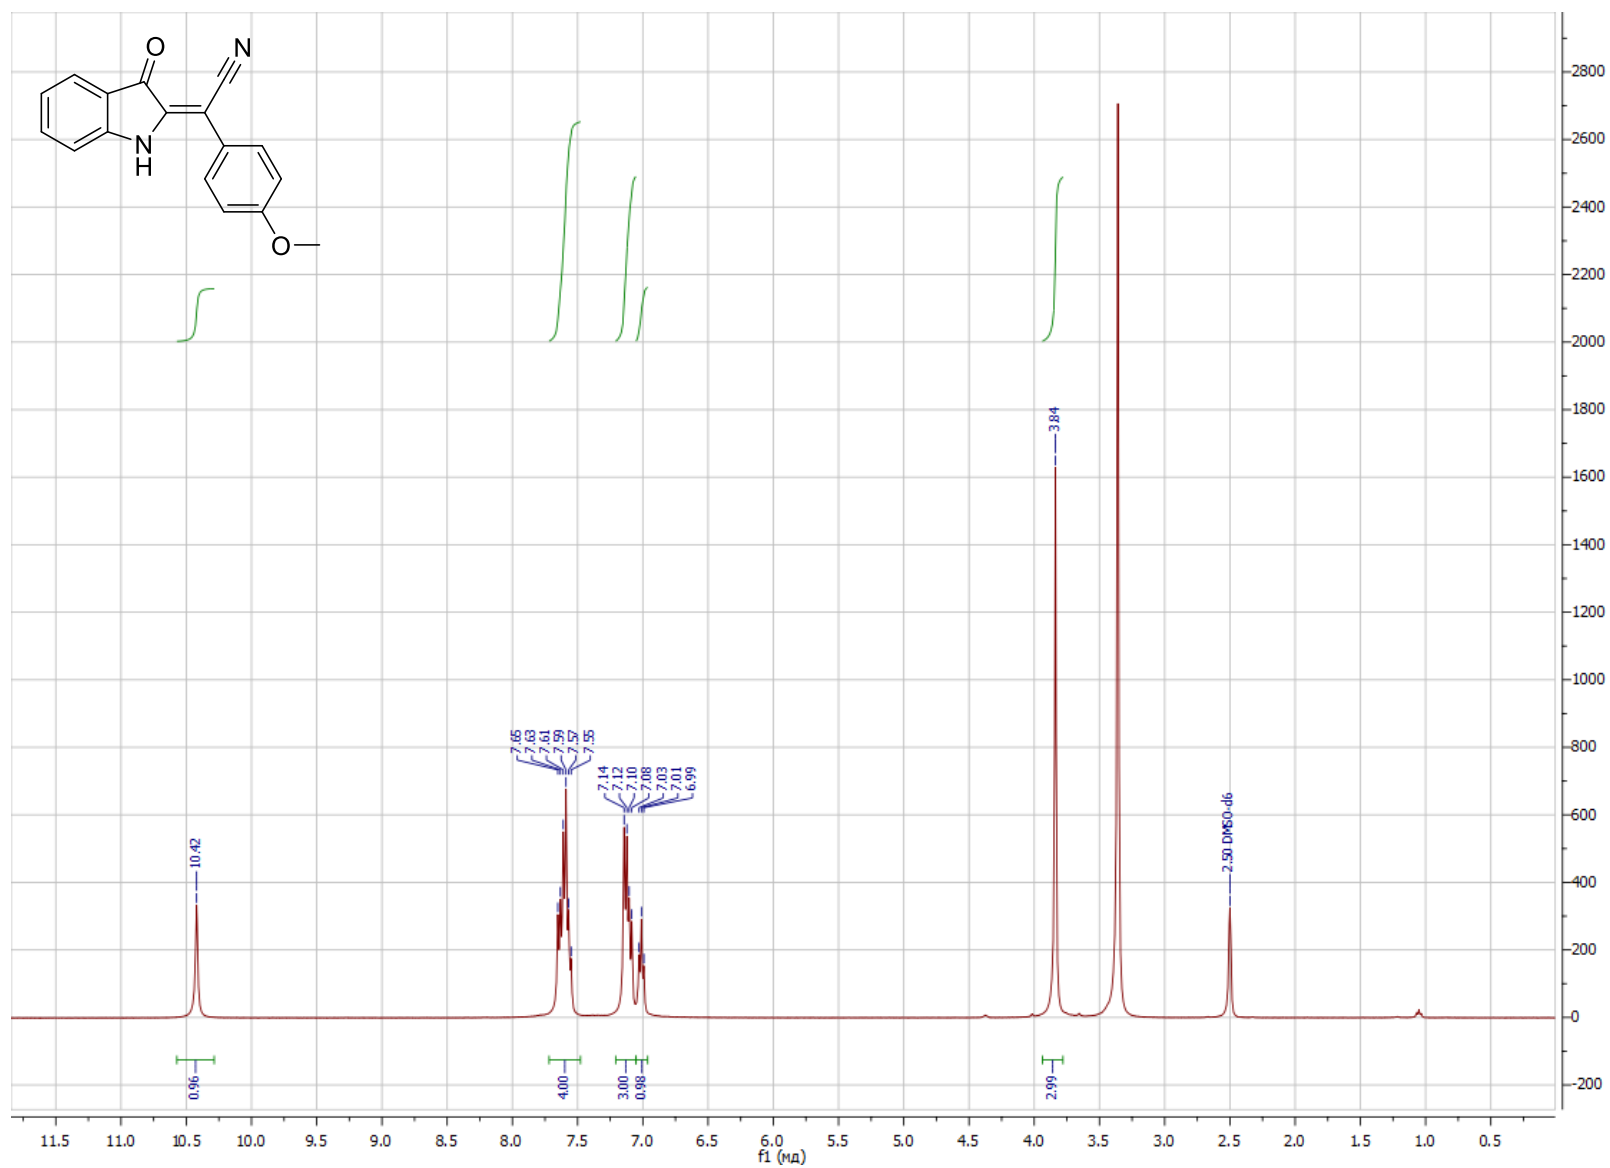

**Figure S1.**  $^1\text{H}$  NMR spectrum of **2aa** in  $\text{DMSO}-d_6$  (400 MHz)

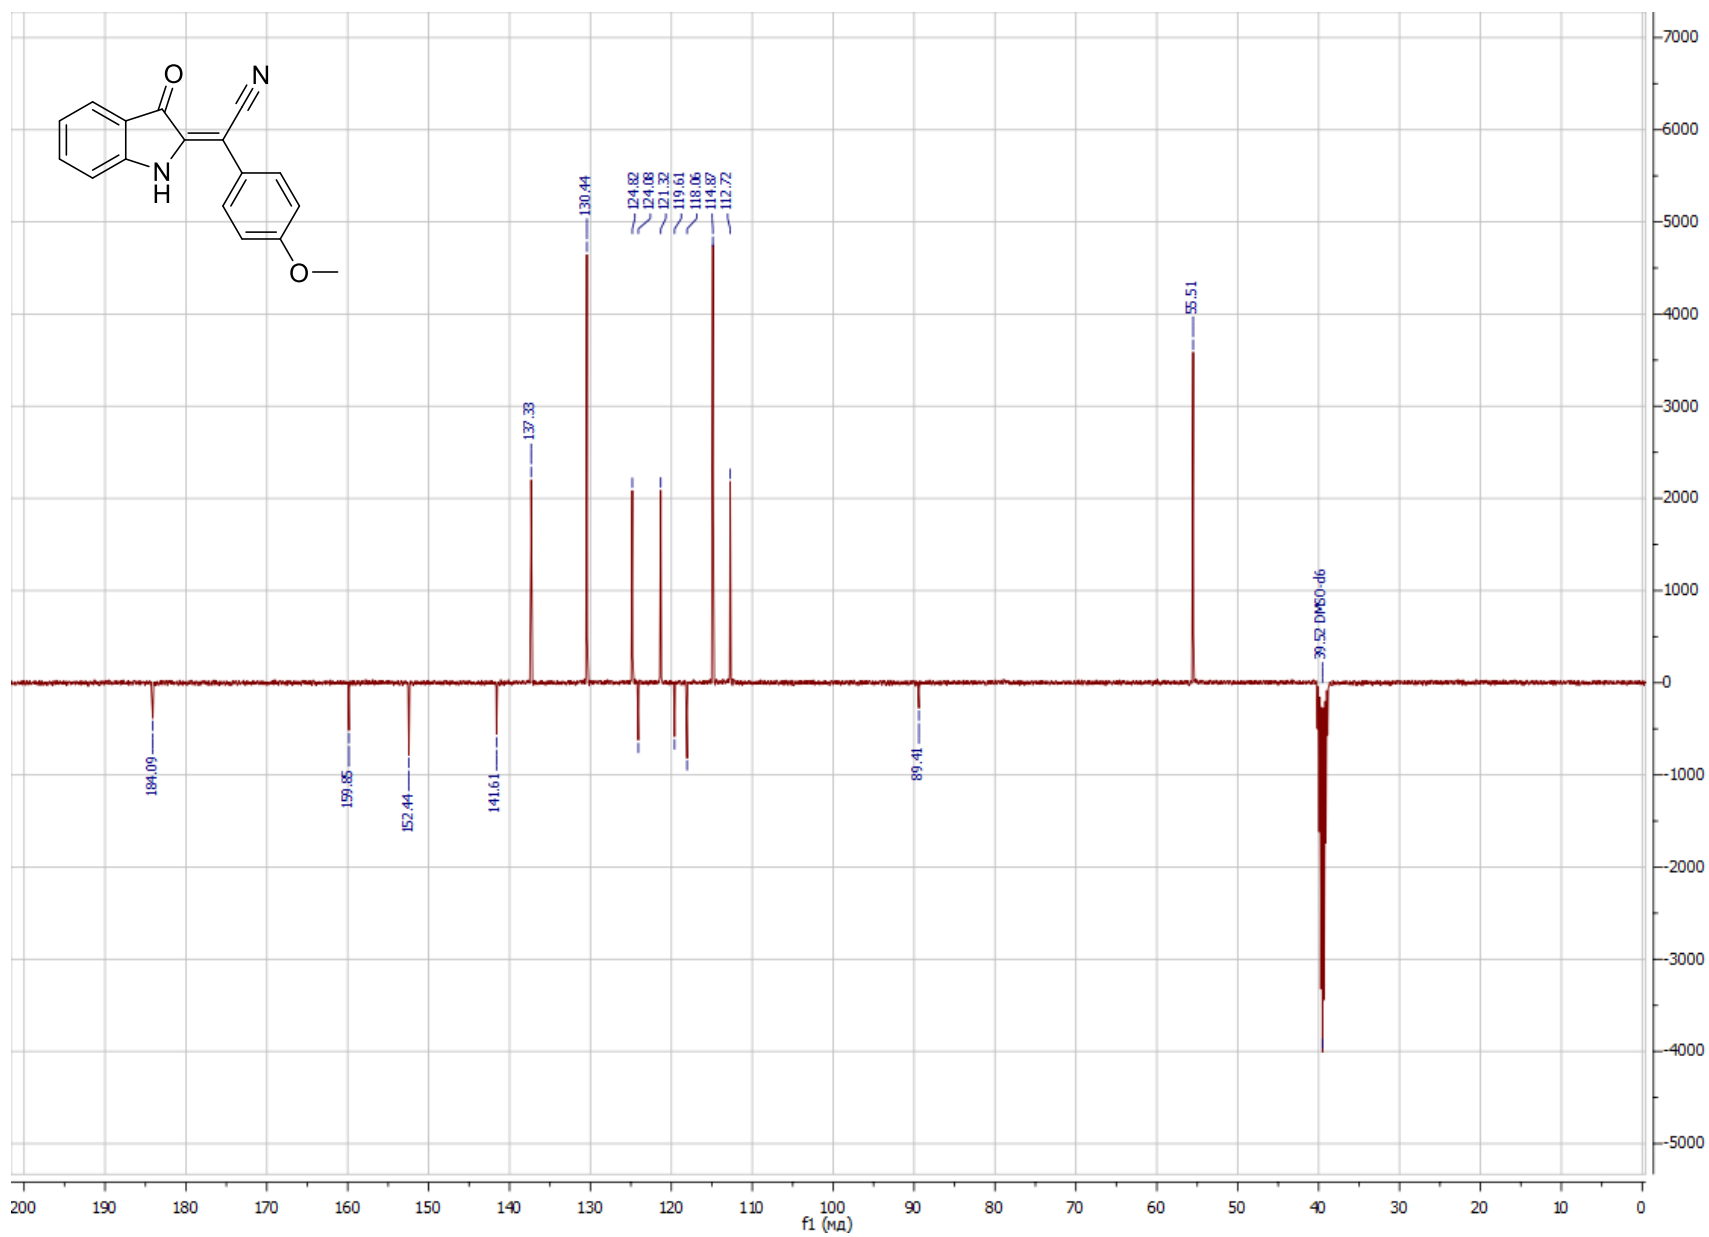

**Figure S2.** <sup>13</sup>C DEPTQ NMR spectrum of **2aa** in DMSO-*d*<sub>6</sub> (100 MHz)

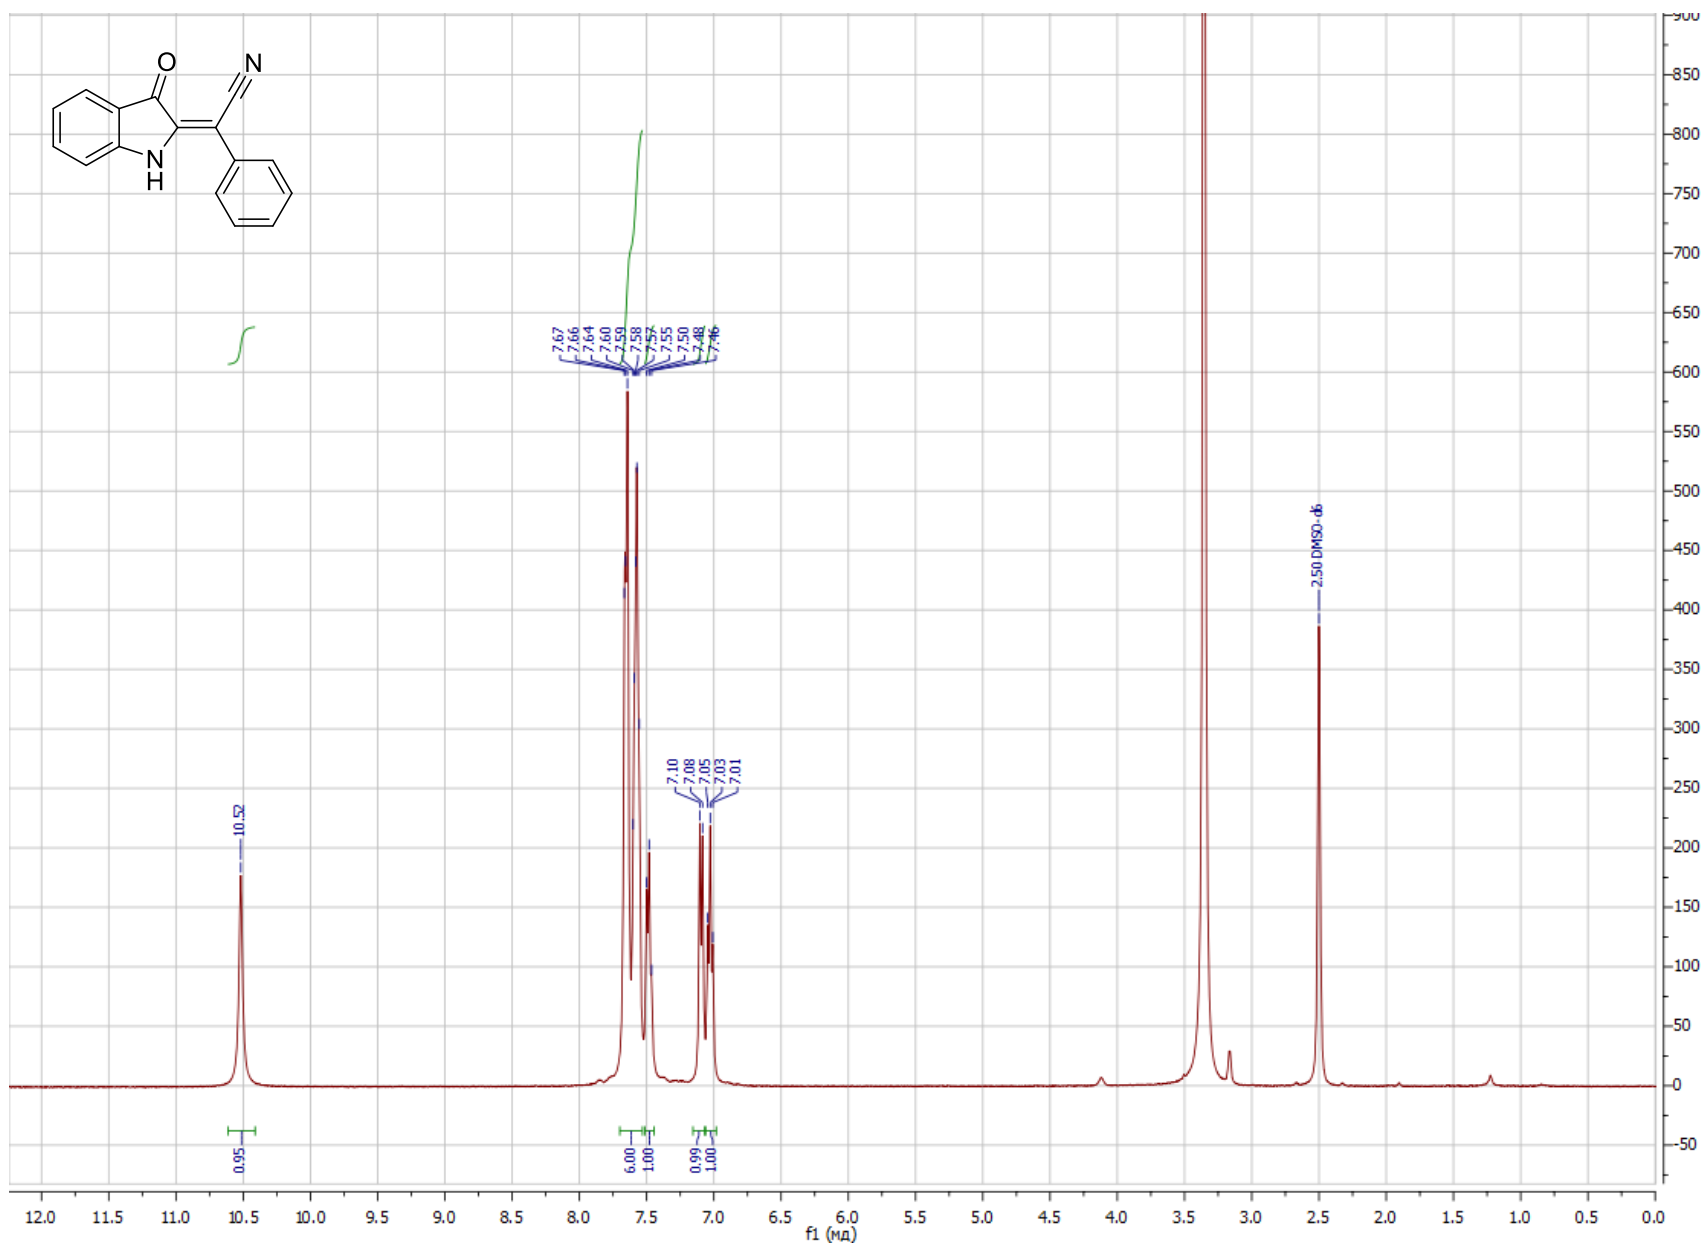

**Figure S3.** <sup>1</sup>H NMR spectrum of **2ab** in DMSO-*d*<sub>6</sub> (400 MHz)

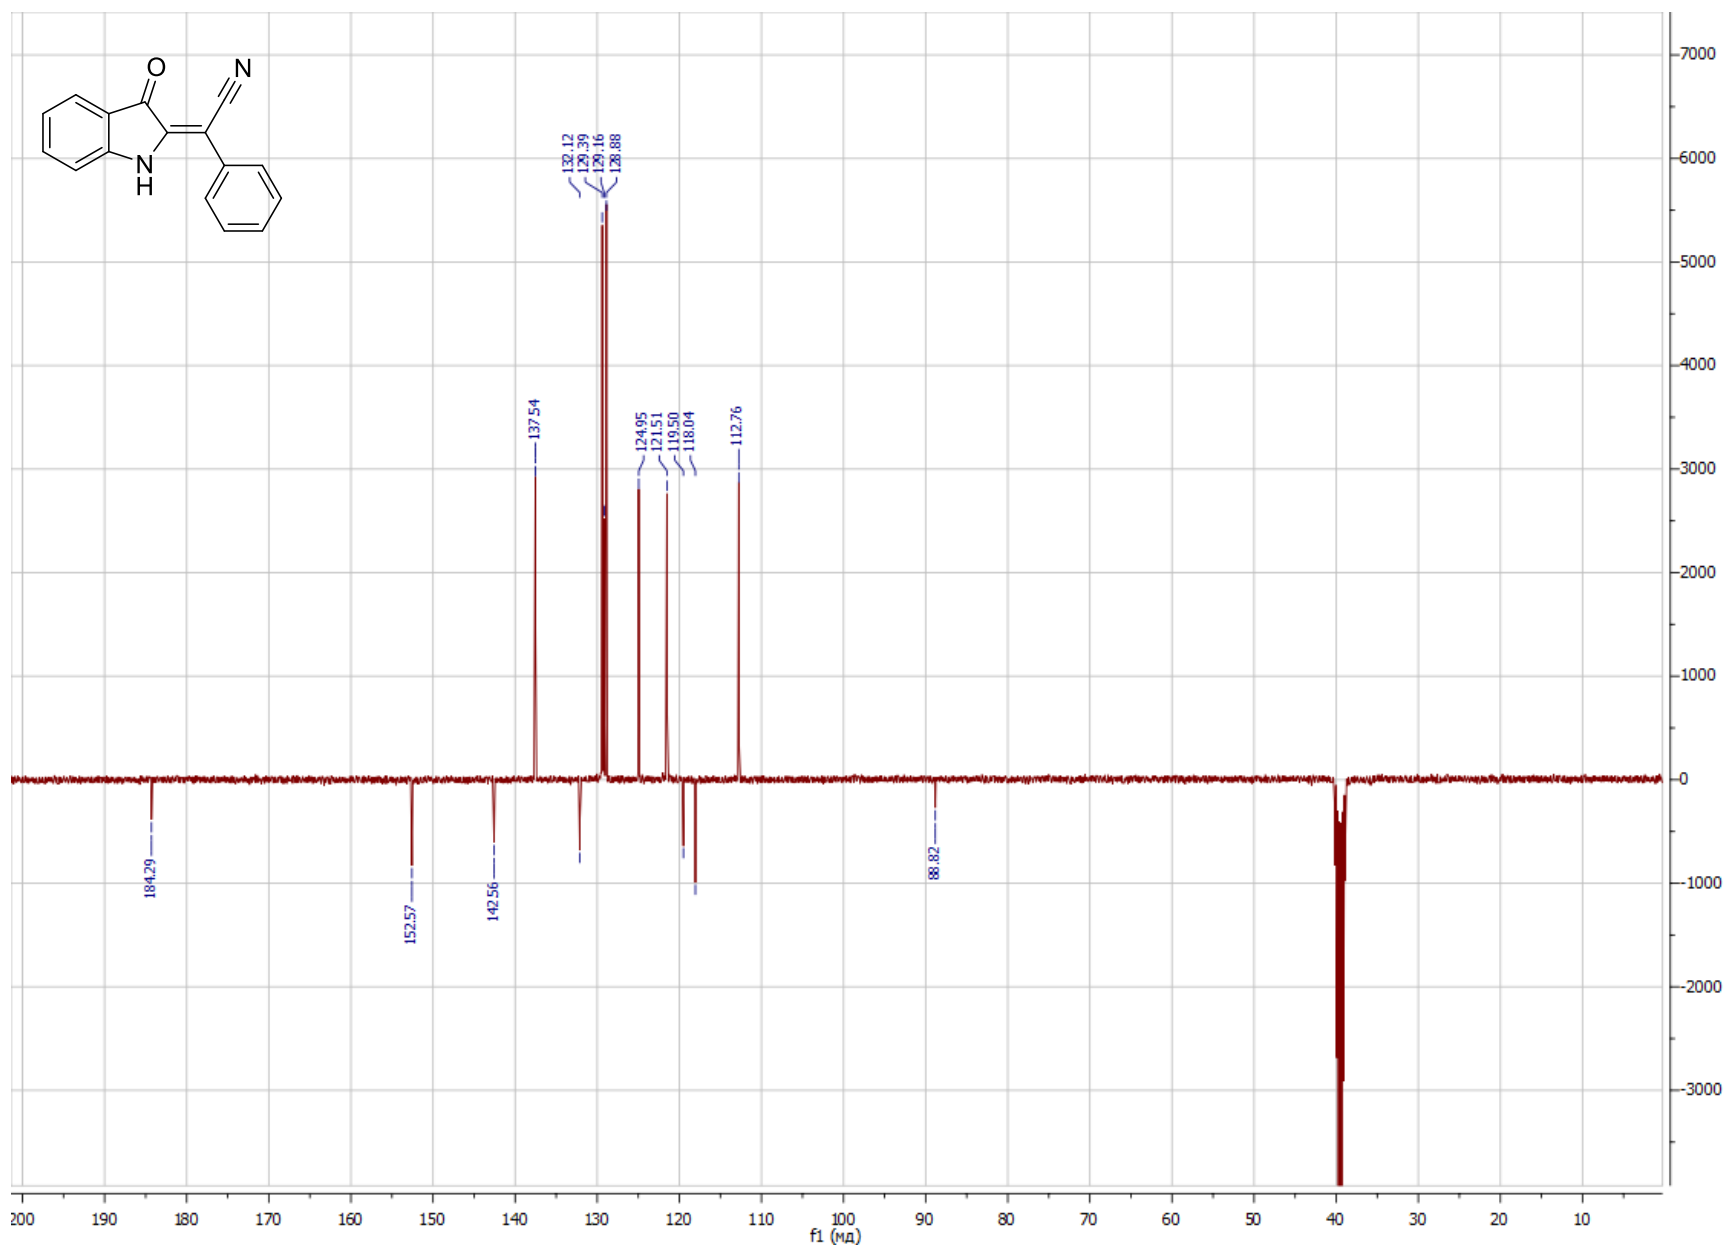

**Figure S4.**  $^{13}\text{C}$  DEPTQ NMR spectrum of **2ab** in  $\text{DMSO}-d_6$  (100 MHz)

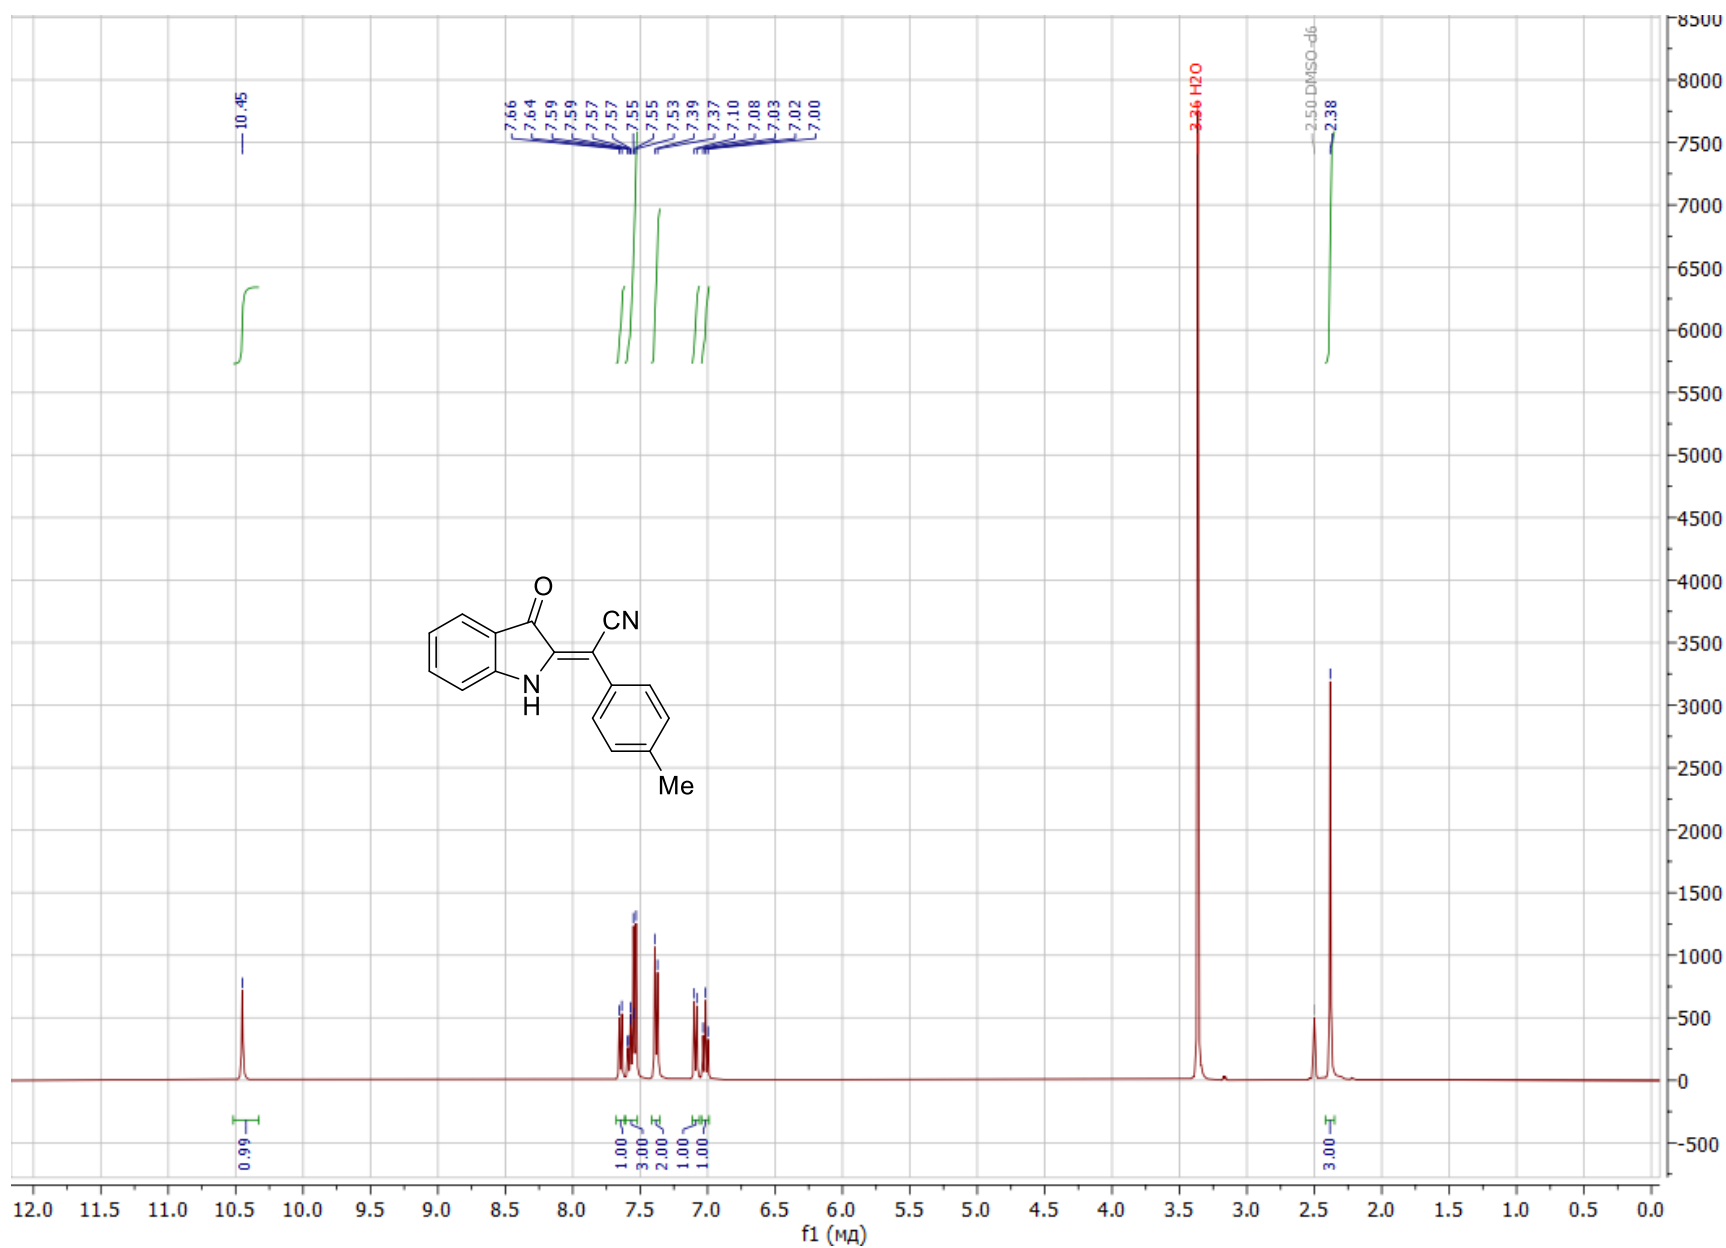

**Figure S5.**  $^1\text{H}$  NMR spectrum of **2ac** in  $\text{DMSO-}d_6$  (400 MHz)

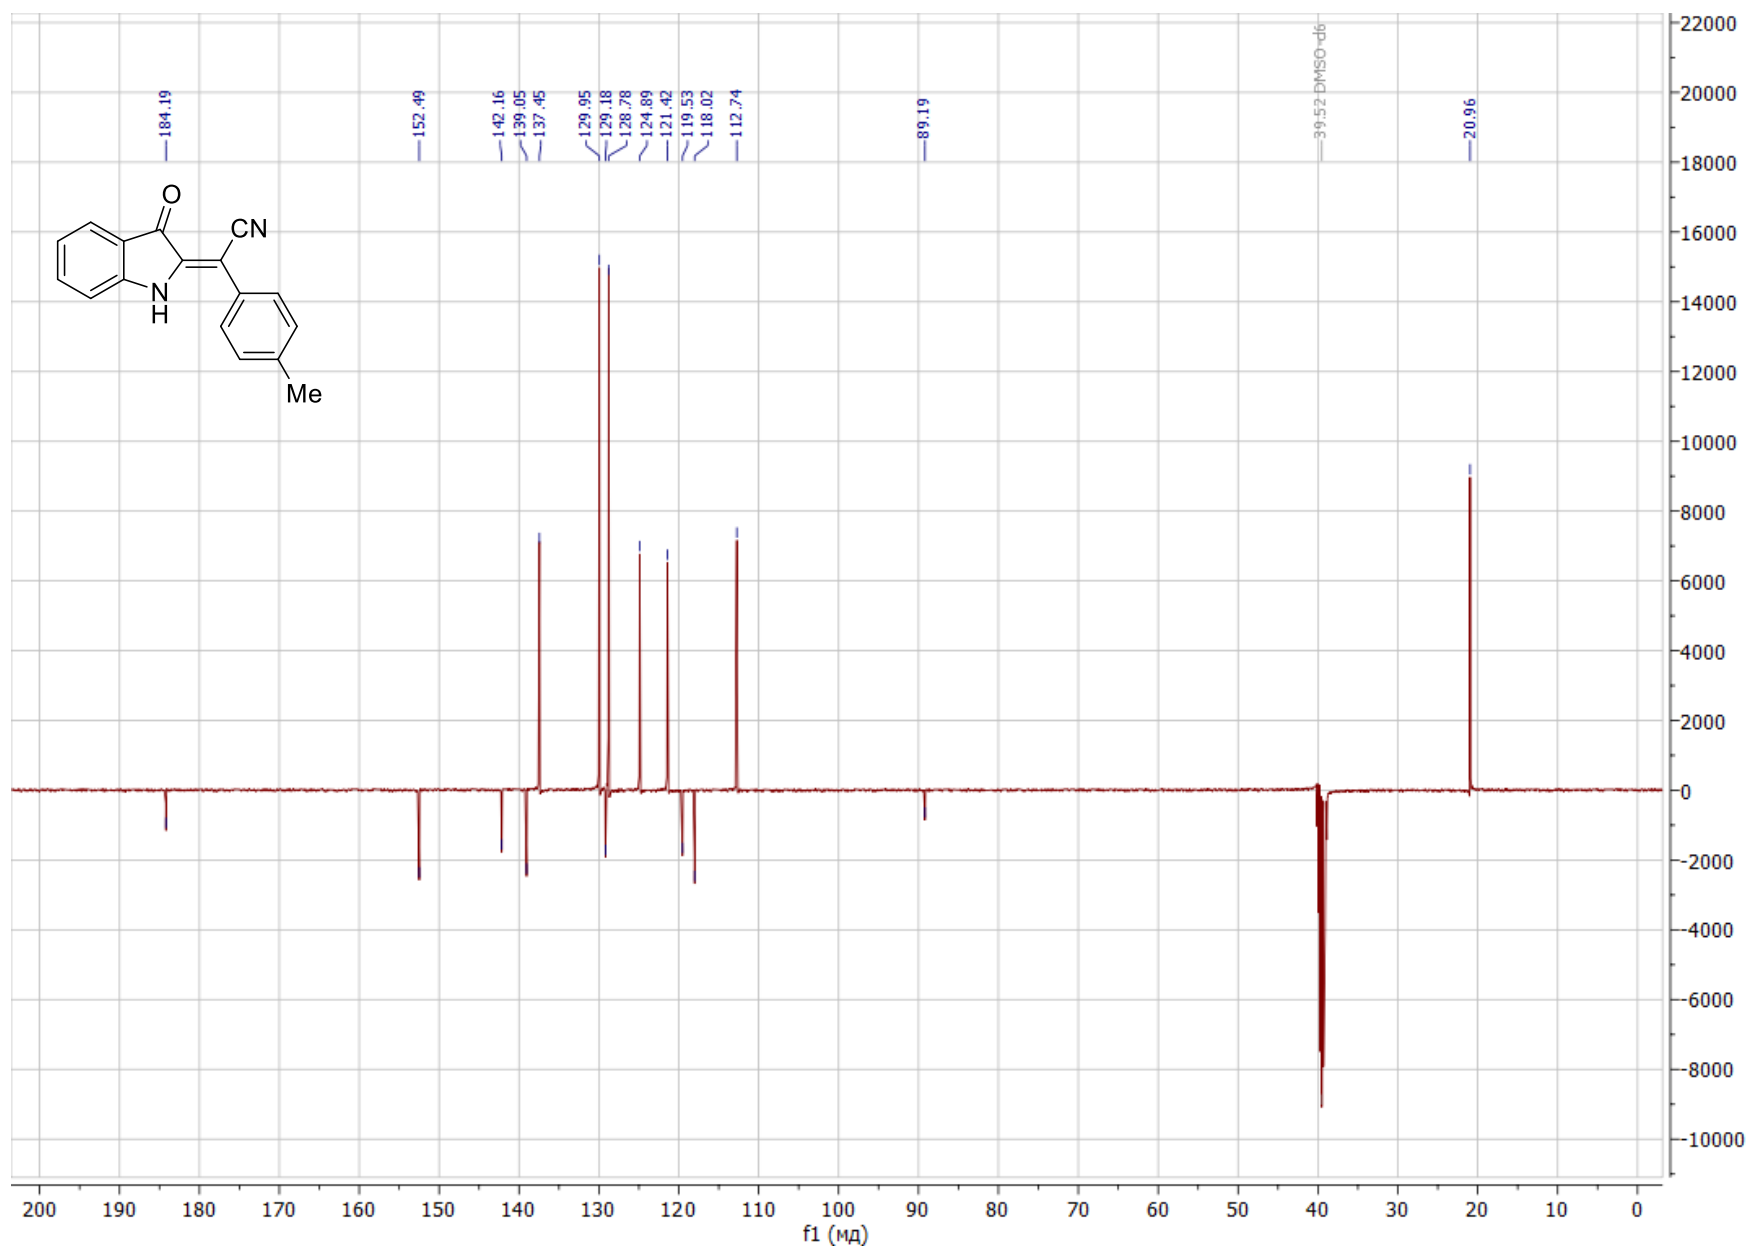

**Figure S6.** <sup>13</sup>C DEPTQ NMR spectrum of **2ac** in DMSO-*d*<sub>6</sub> (100 MHz)

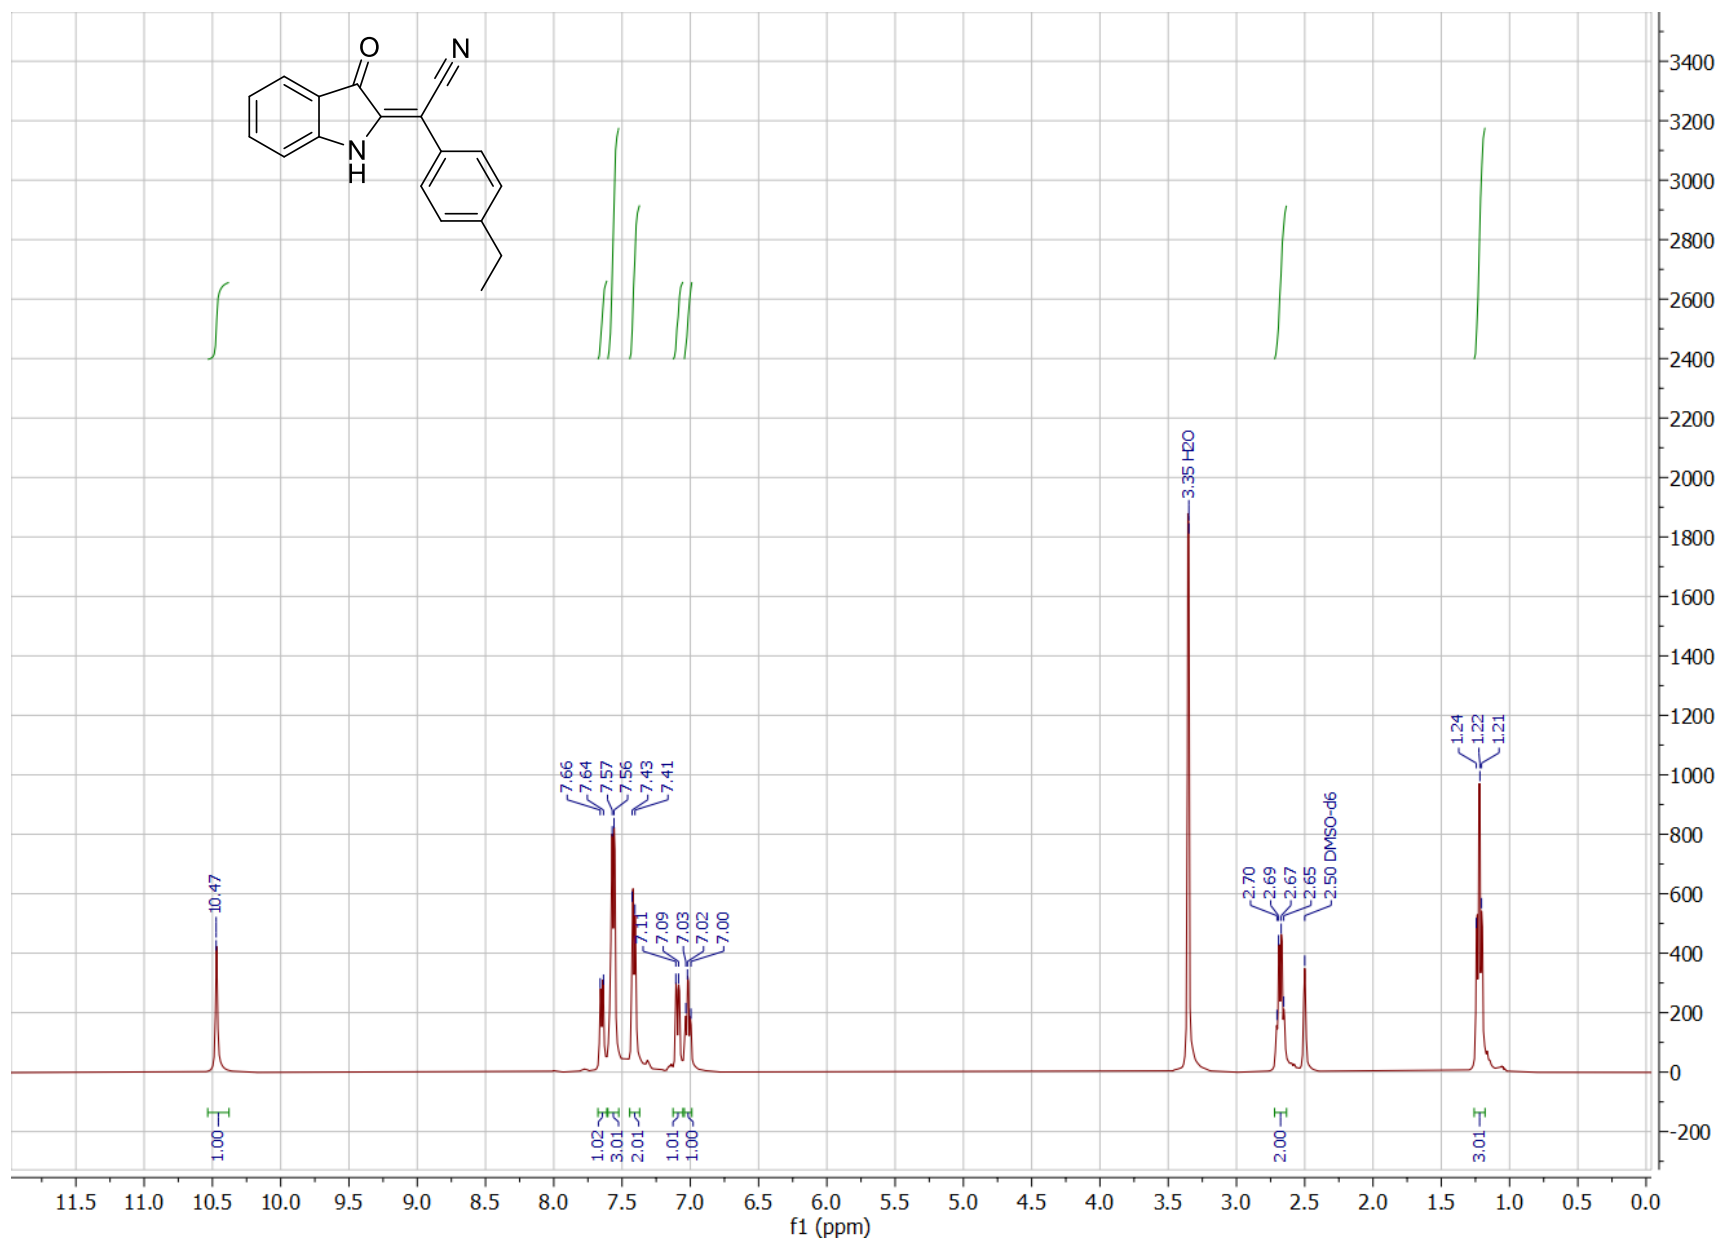

**Figure S7.** <sup>1</sup>H NMR spectrum of **2ad** in DMSO-*d*<sub>6</sub> (400 MHz)

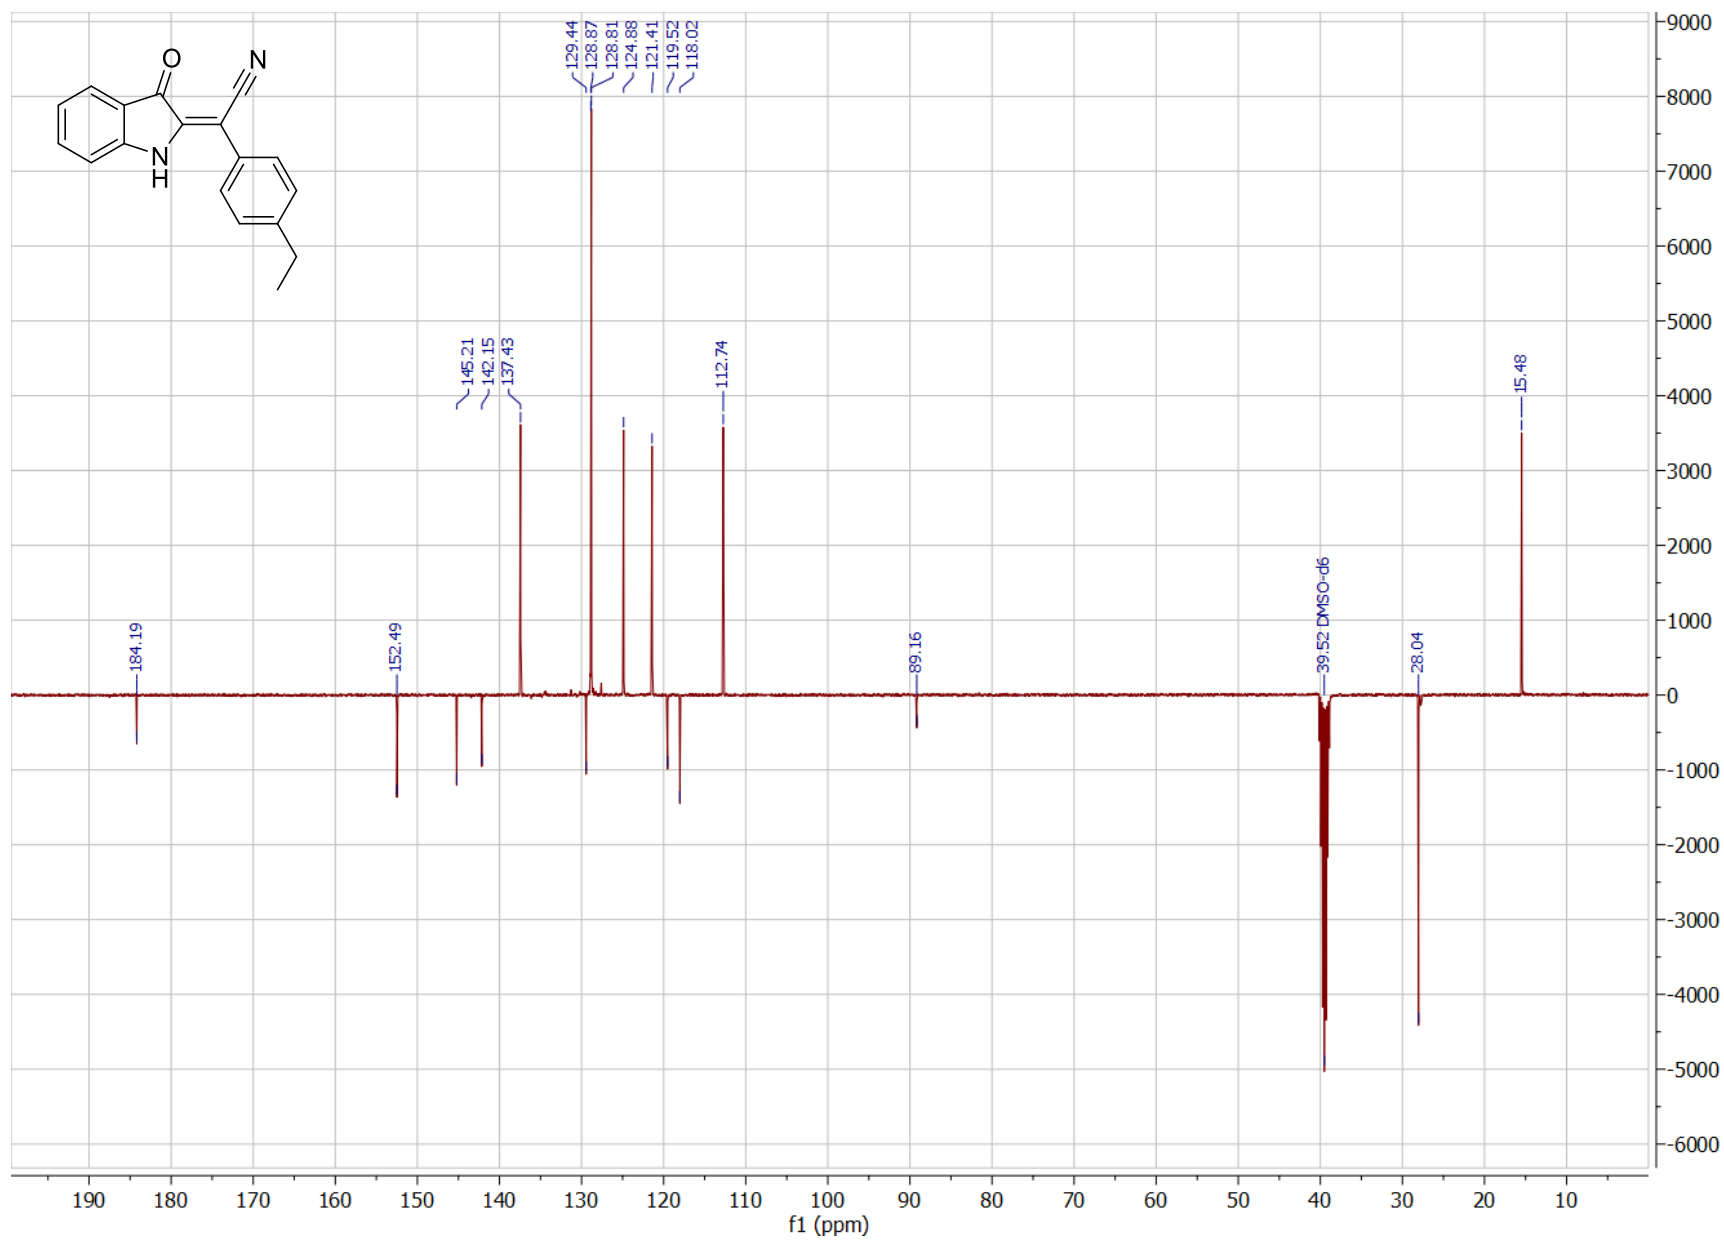

**Figure S8.** <sup>13</sup>C DEPTQ NMR spectrum of **2ad** in DMSO-*d*<sub>6</sub> (100 MHz)

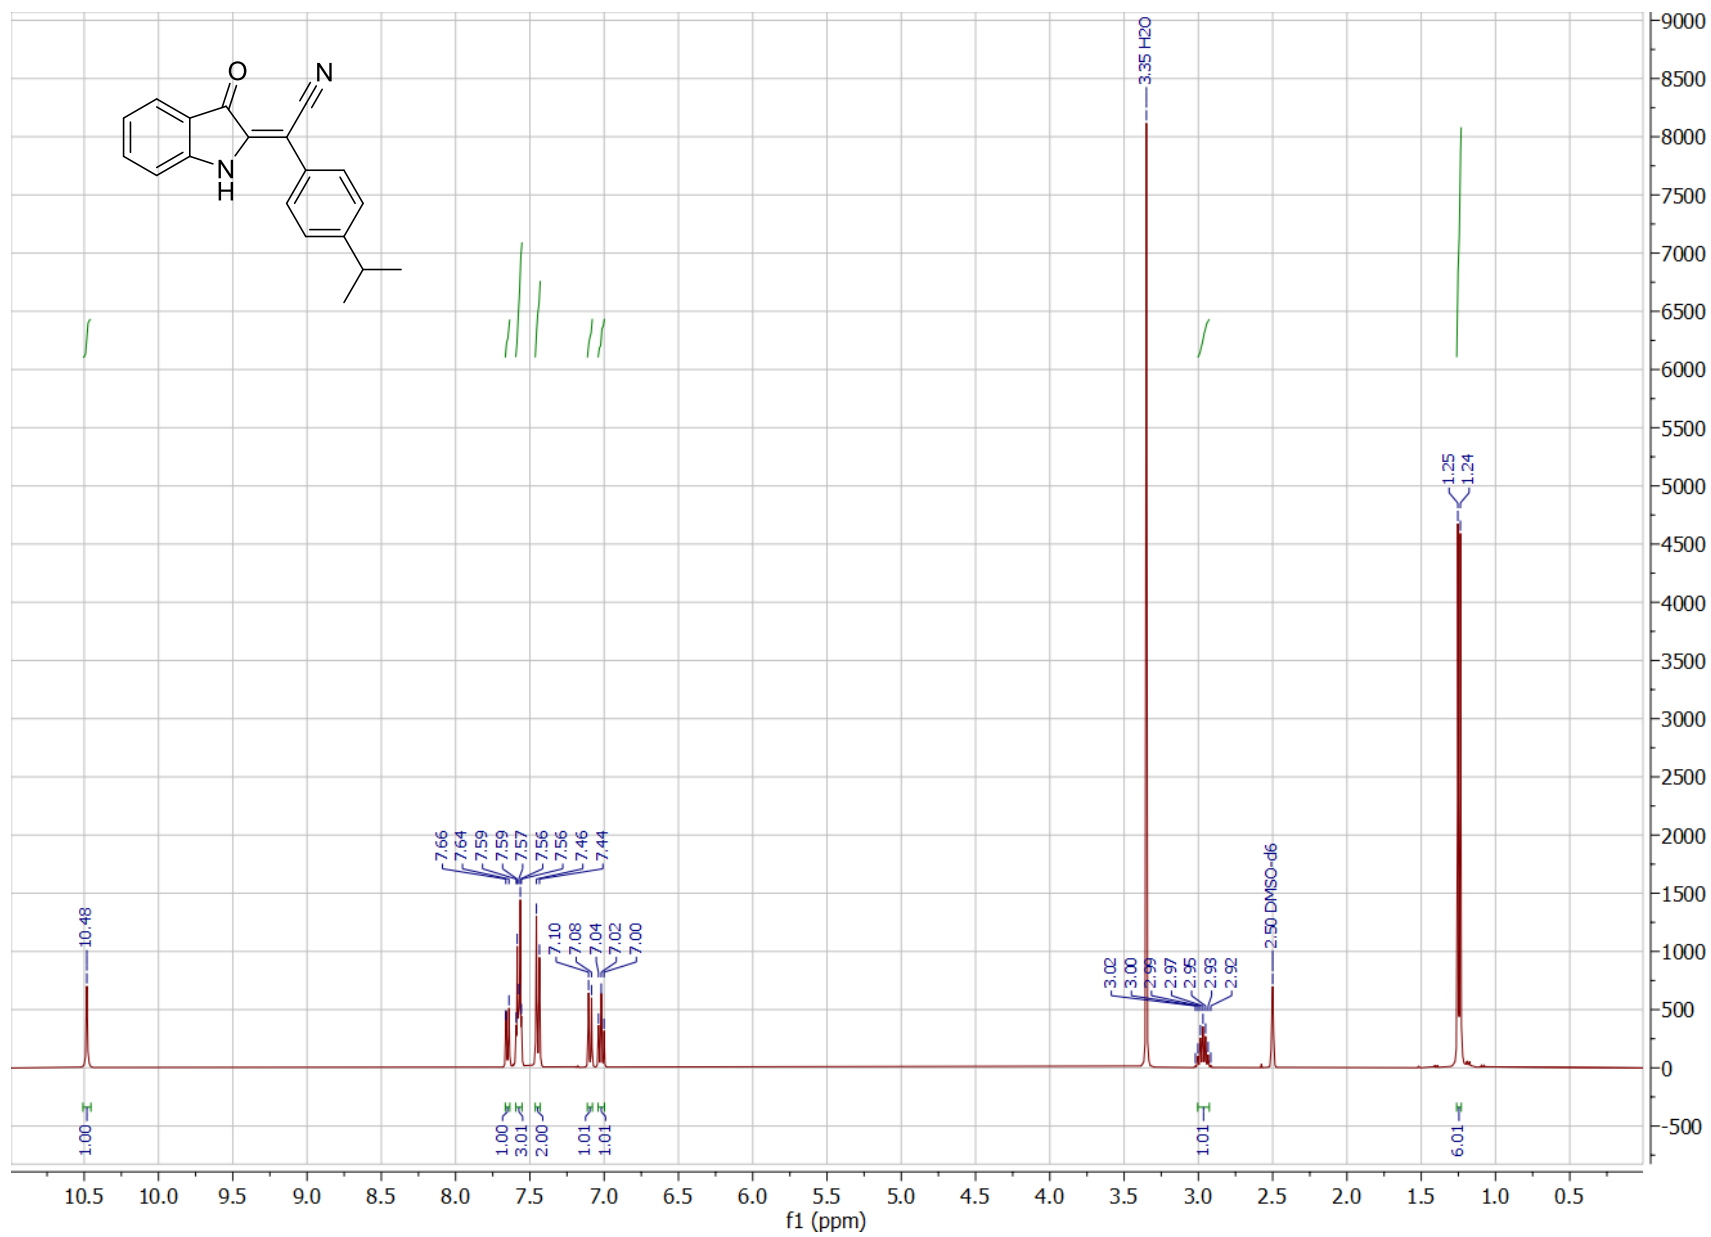

**Figure S9.** <sup>1</sup>H NMR spectrum of **2ae** in DMSO-*d*<sub>6</sub> (400 MHz)

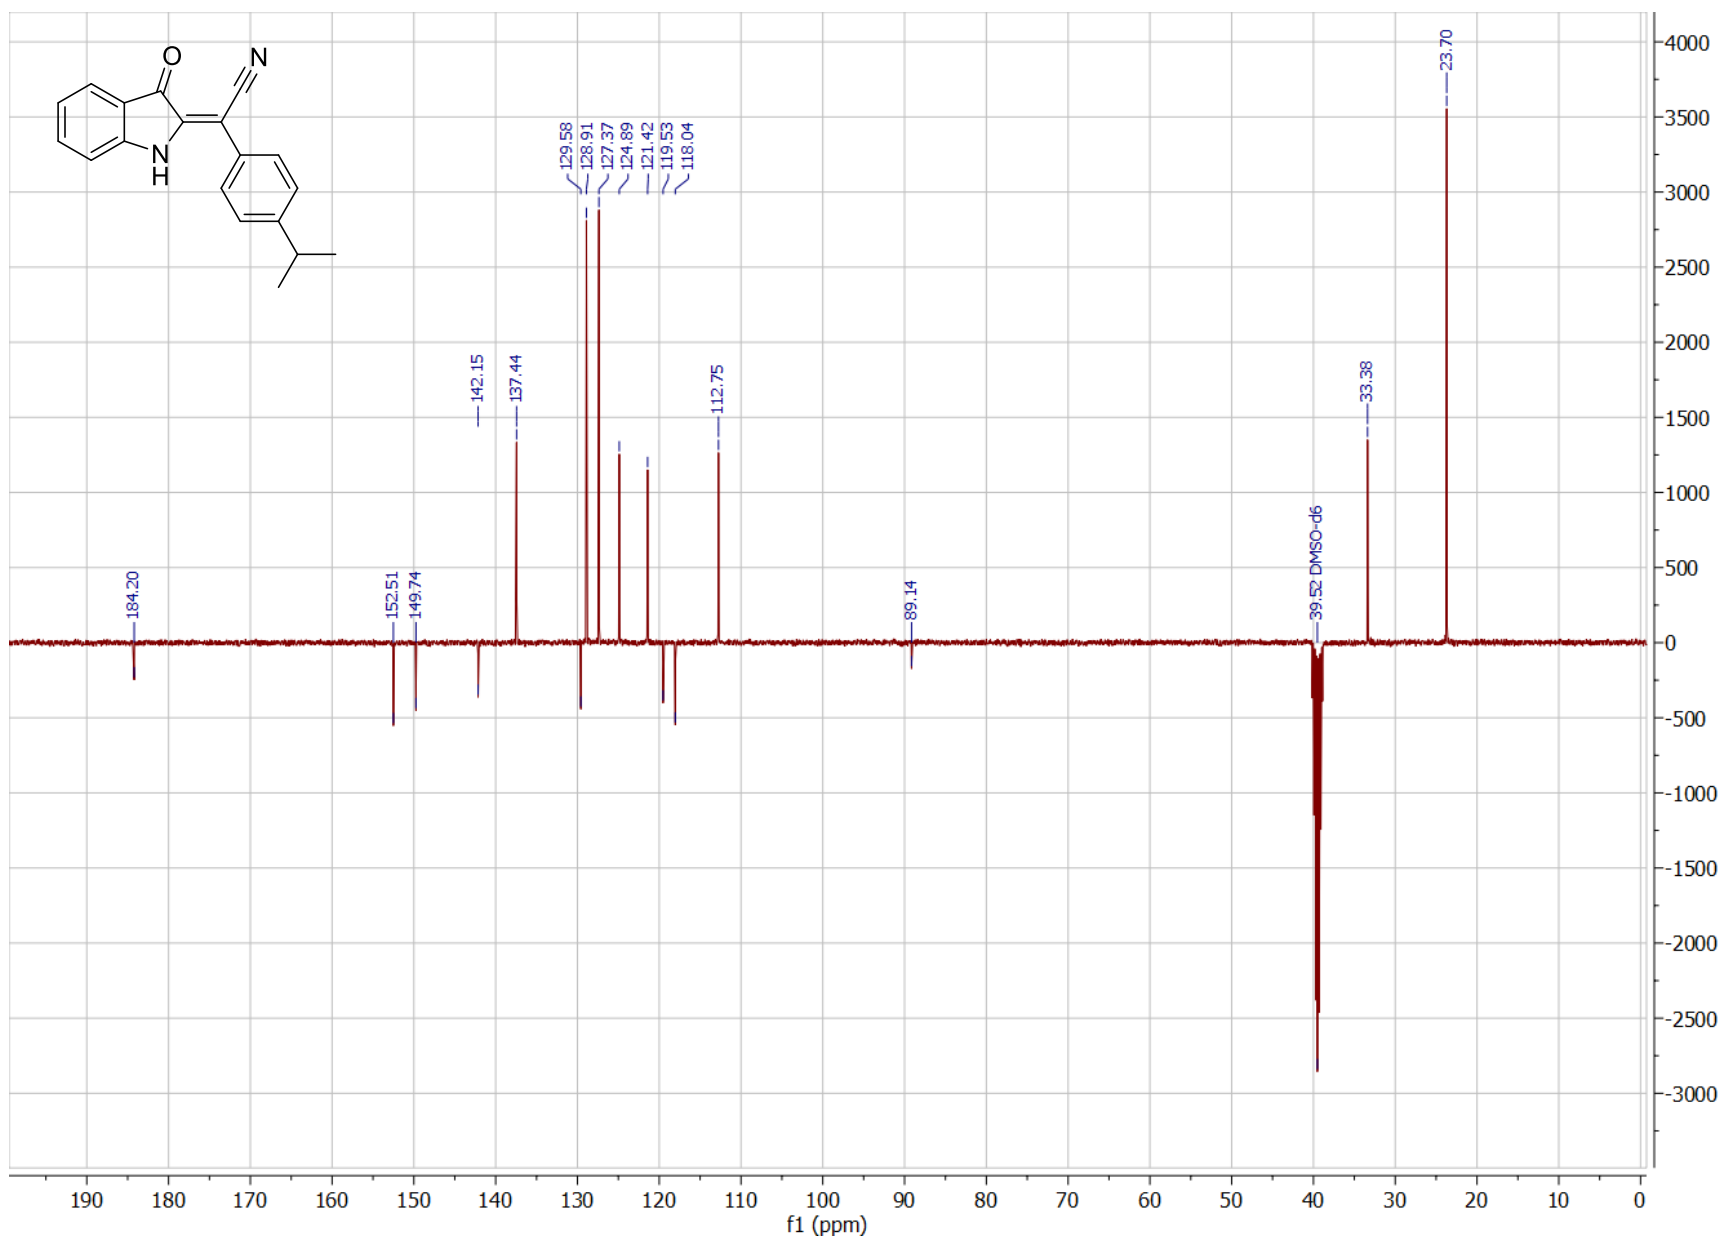

**Figure S10.** <sup>13</sup>C DEPTQ NMR spectrum of 2ae in DMSO-*d*<sub>6</sub> (100 MHz)

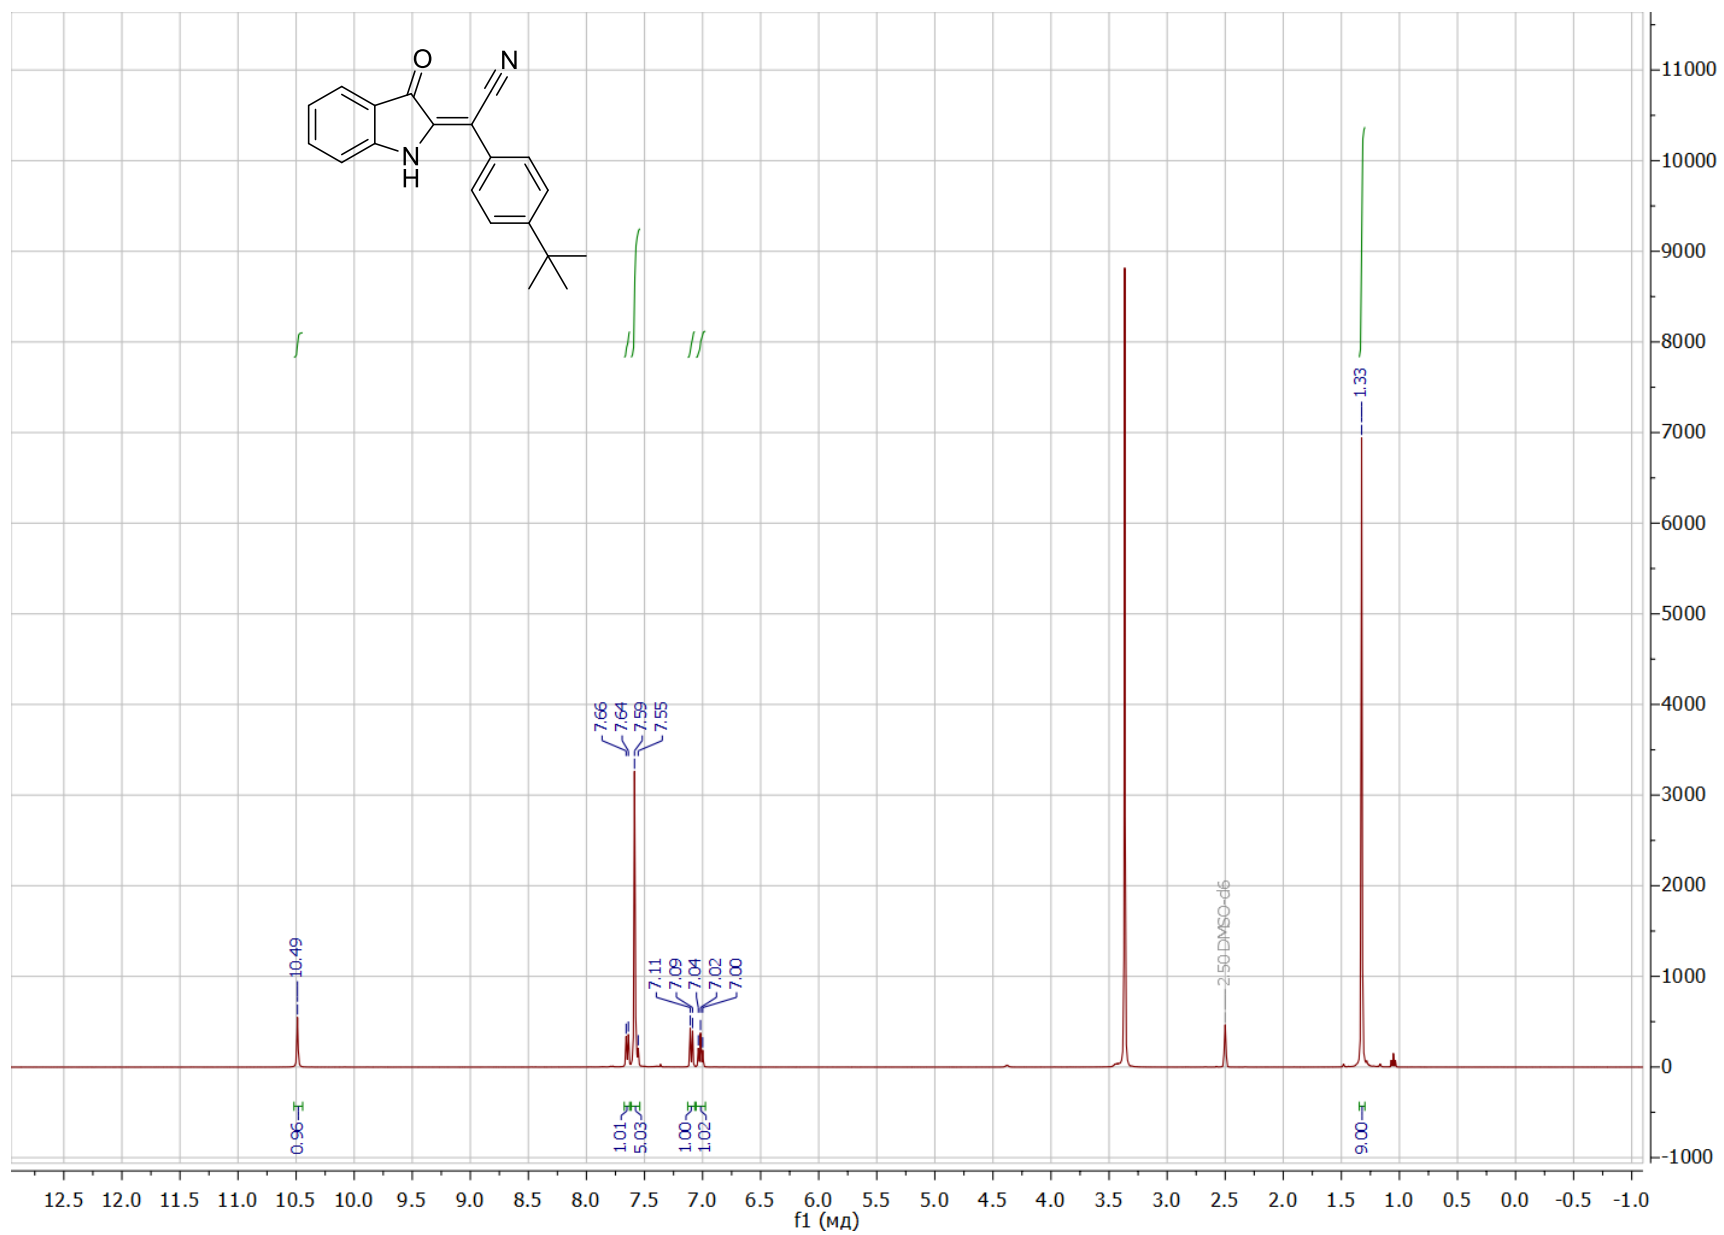

**Figure S11.** <sup>1</sup>H NMR spectrum of **2af** in DMSO-*d*<sub>6</sub> (400 MHz)

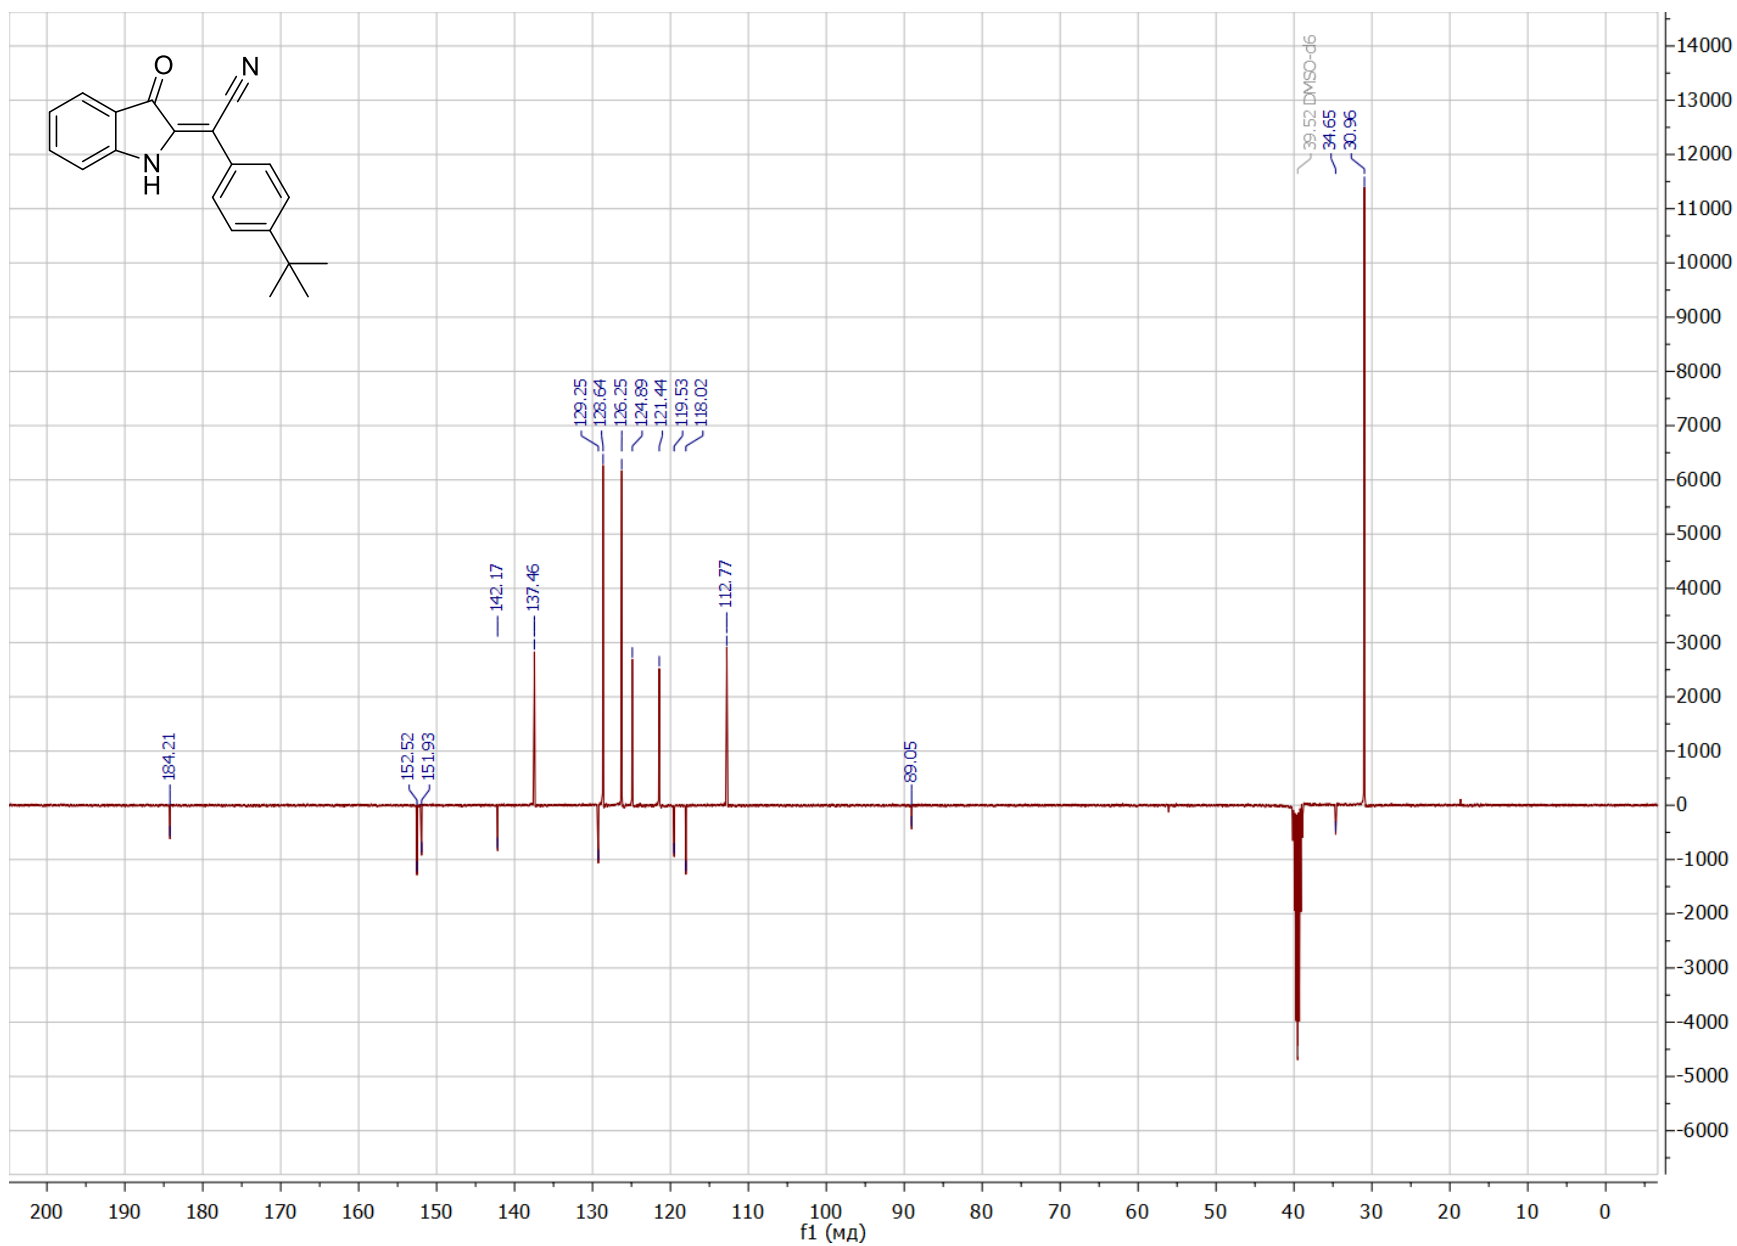

**Figure S12.** <sup>13</sup>C DEPTQ NMR spectrum of **2af** in DMSO-*d*<sub>6</sub> (100 MHz)

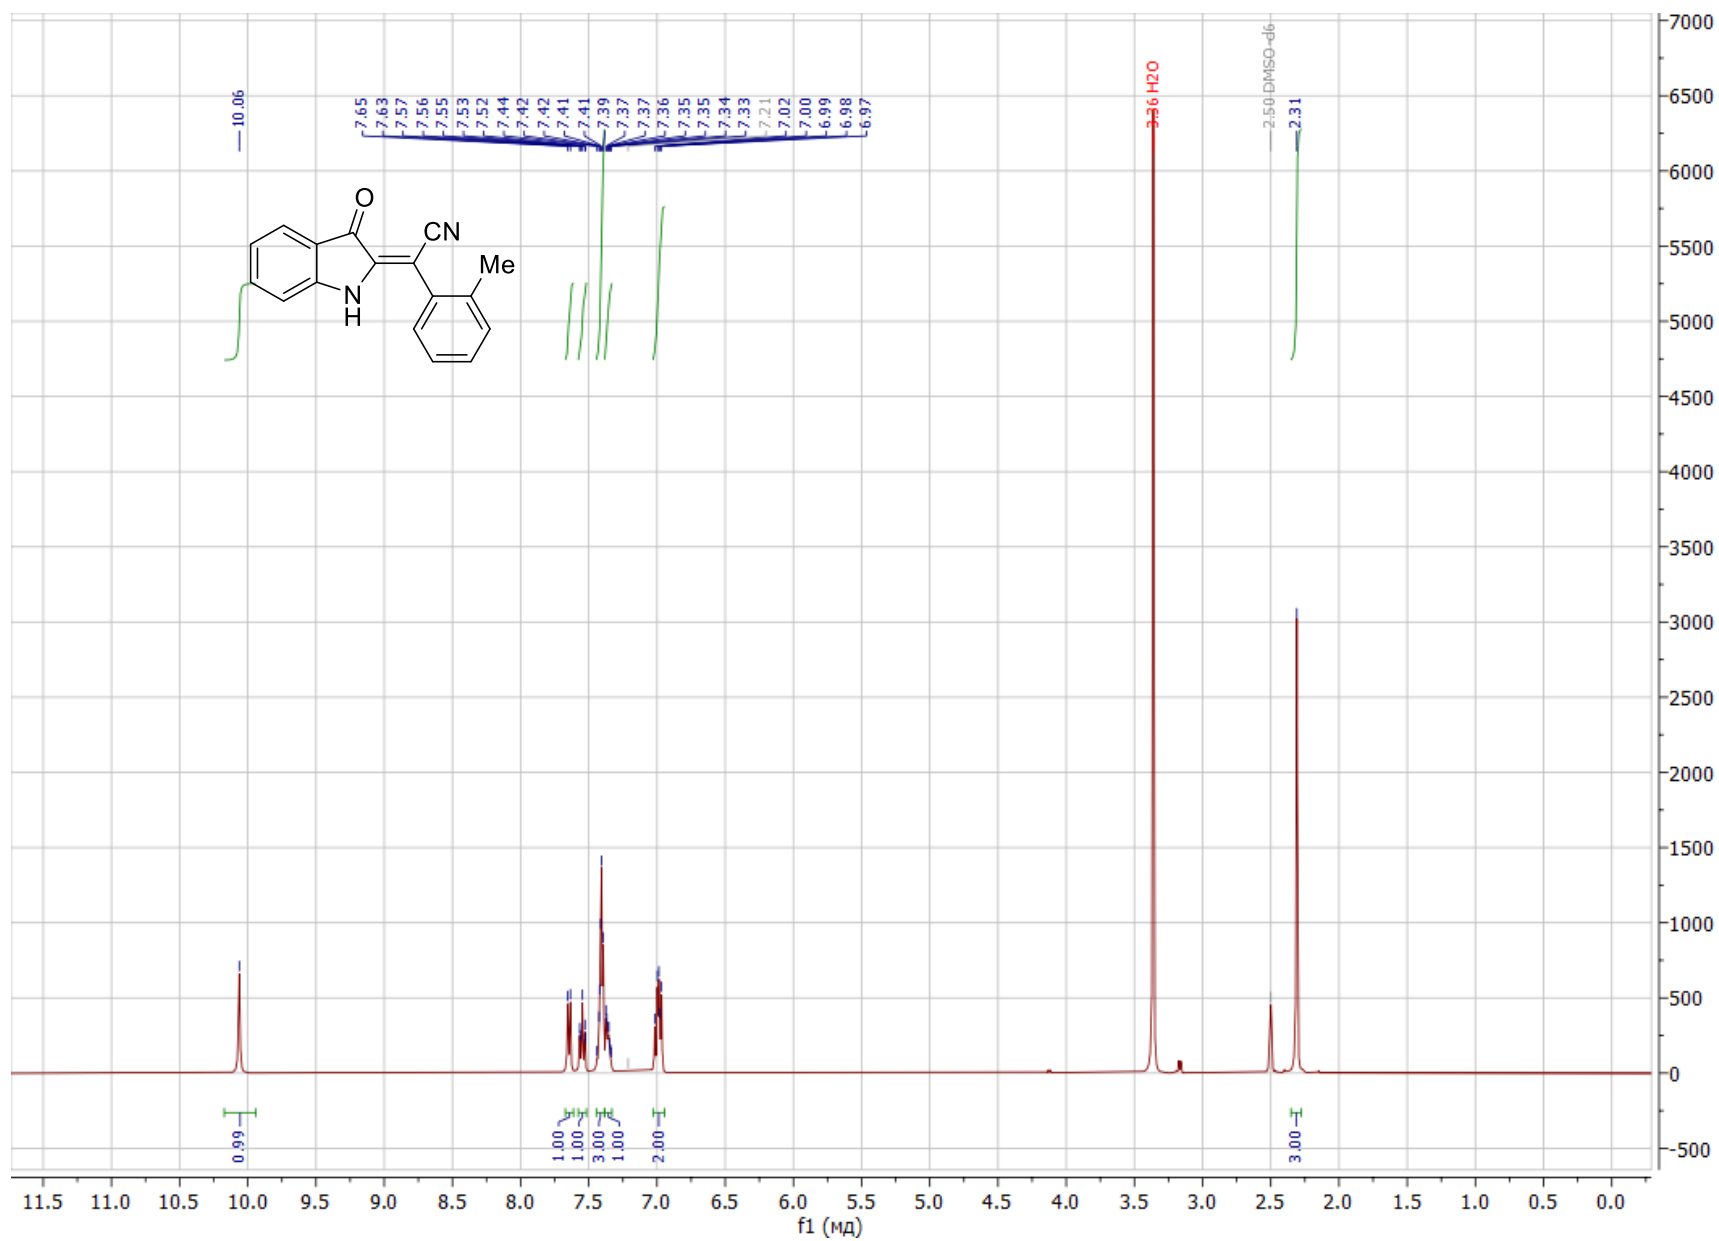

**Figure S13.**  $^1\text{H}$  NMR spectrum of **2ag** in  $\text{DMSO}-d_6$  (400 MHz)

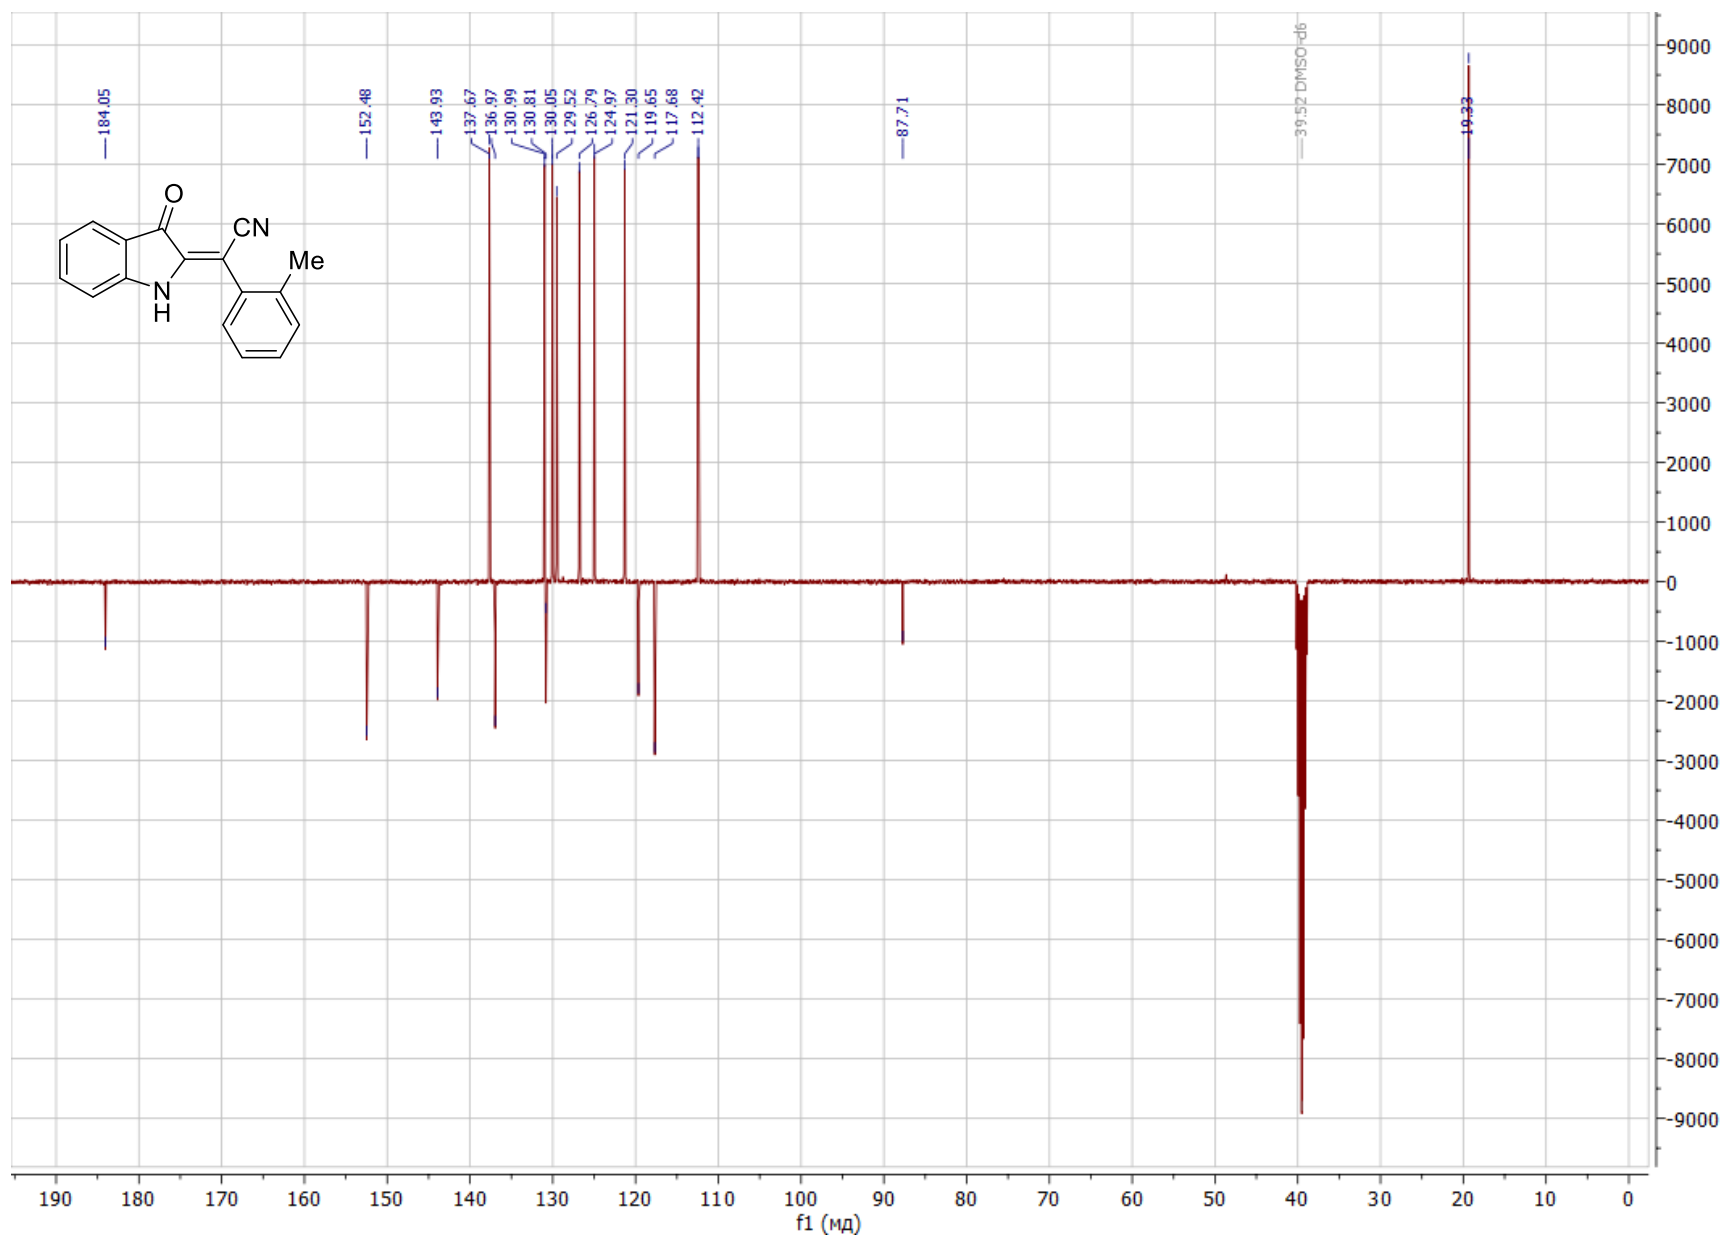

**Figure S14.** <sup>13</sup>C DEPTQ NMR spectrum of **2ag** in DMSO-*d*<sub>6</sub> (100 MHz)

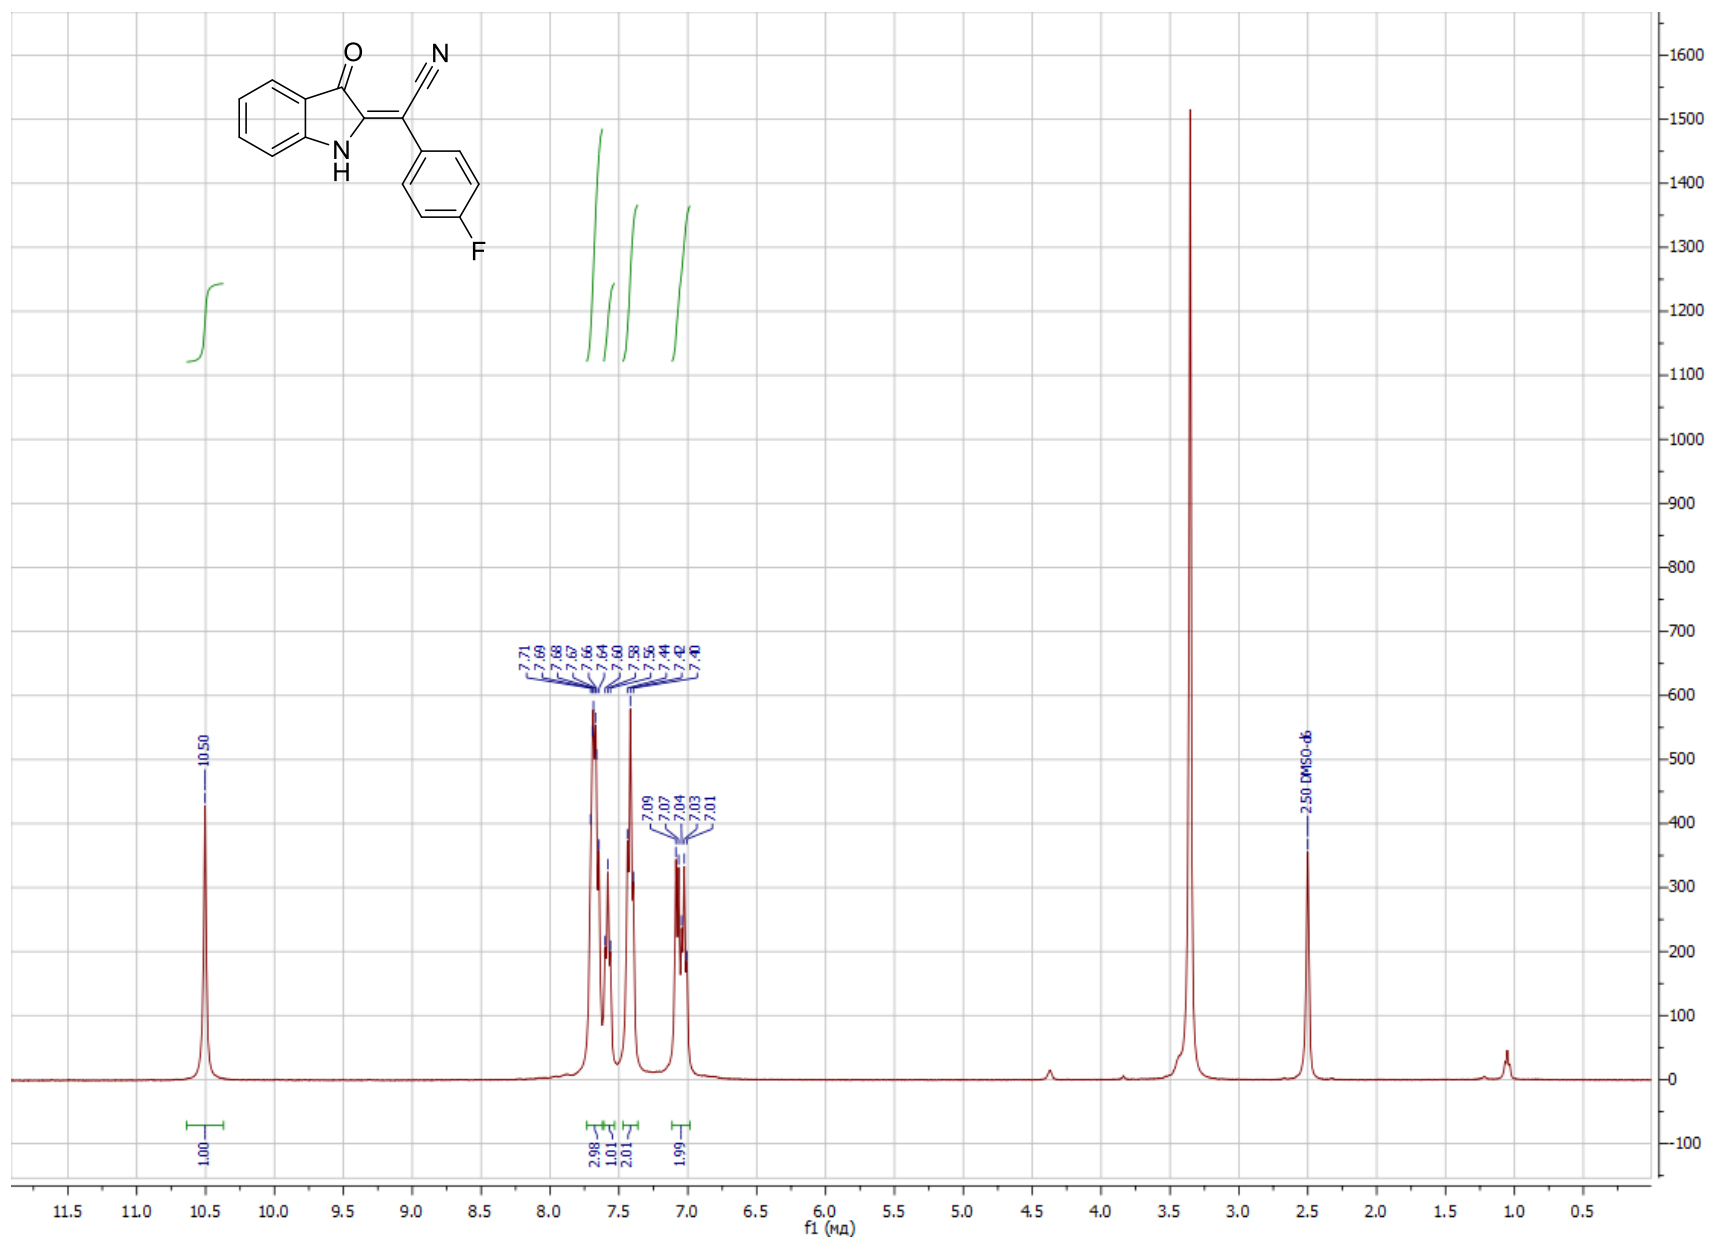

**Figure S15.** <sup>1</sup>H NMR spectrum of **2ah** in DMSO-*d*<sub>6</sub> (400 MHz)

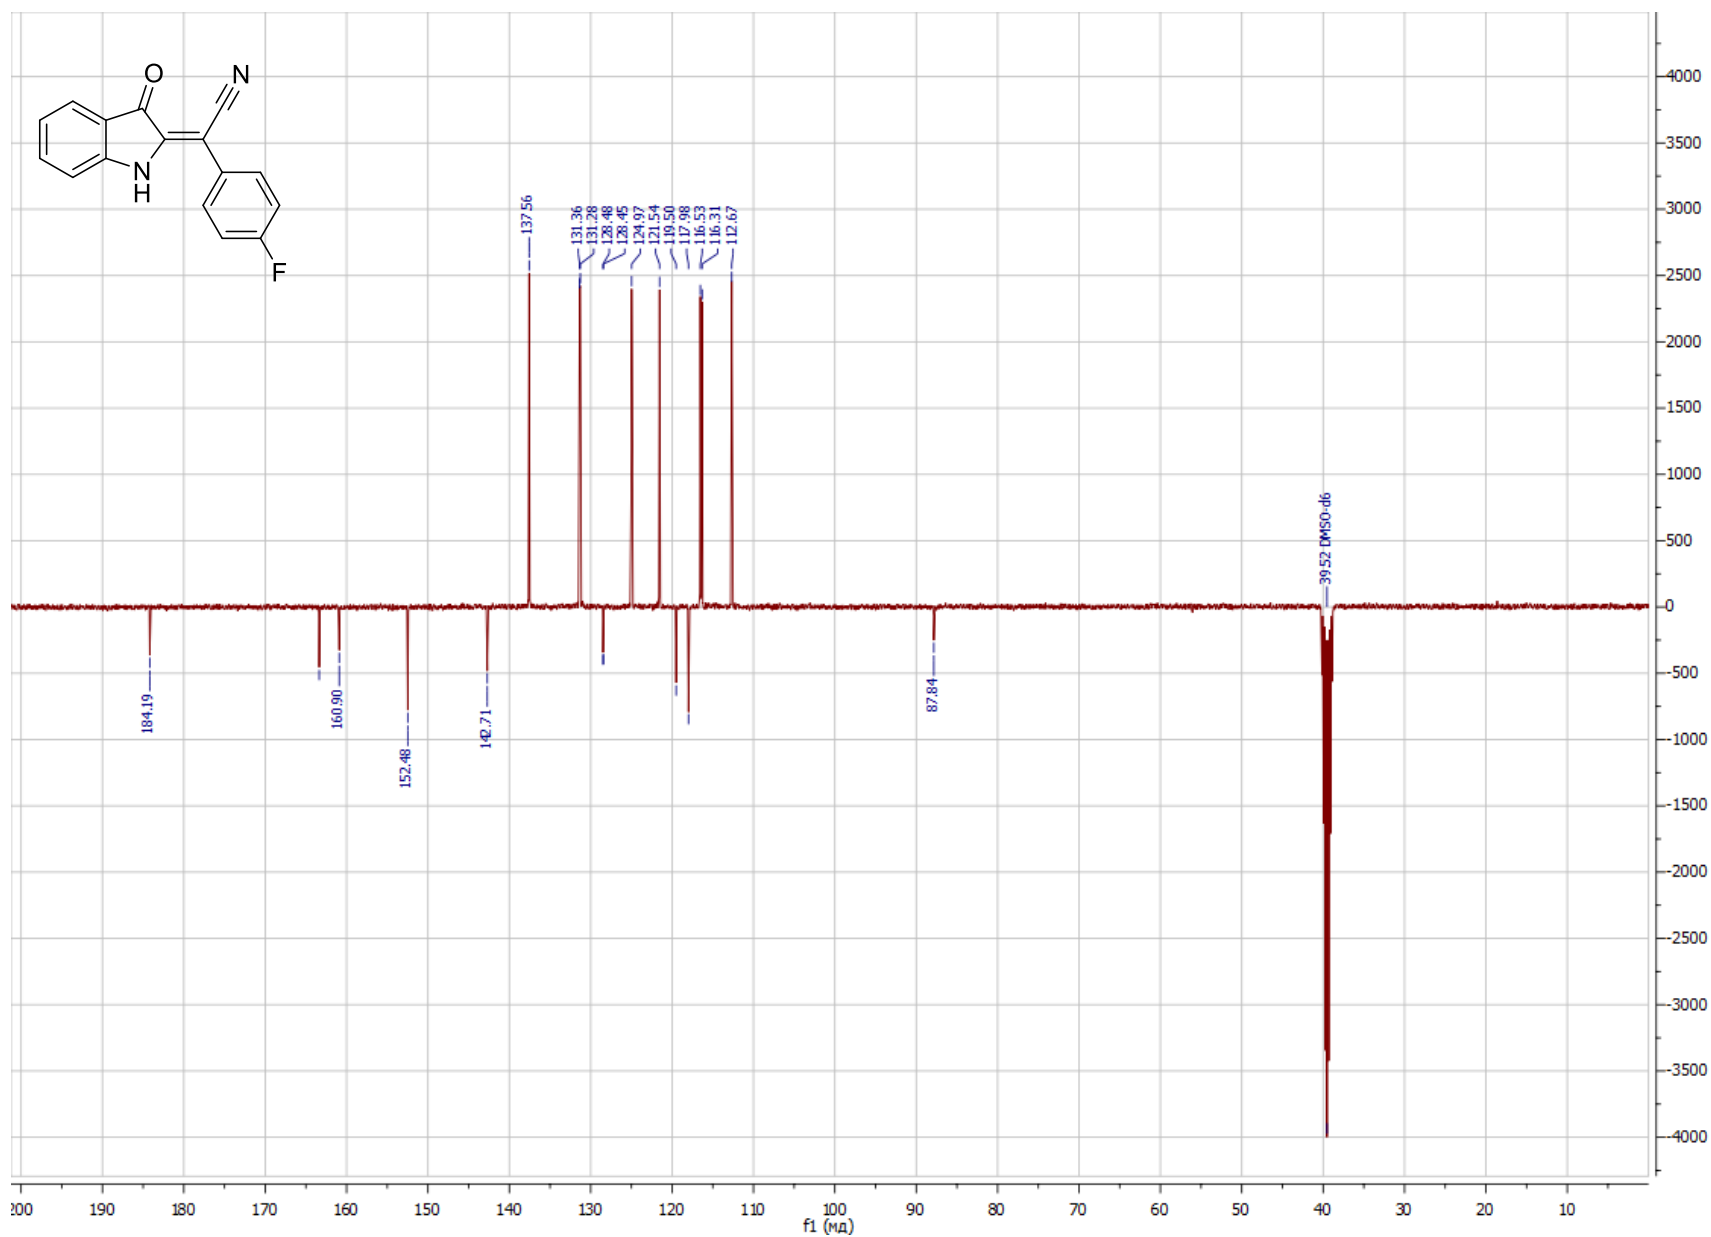

**Figure S16.** <sup>13</sup>C DEPTQ NMR spectrum of **2ah** in DMSO-*d*<sub>6</sub> (100 MHz)

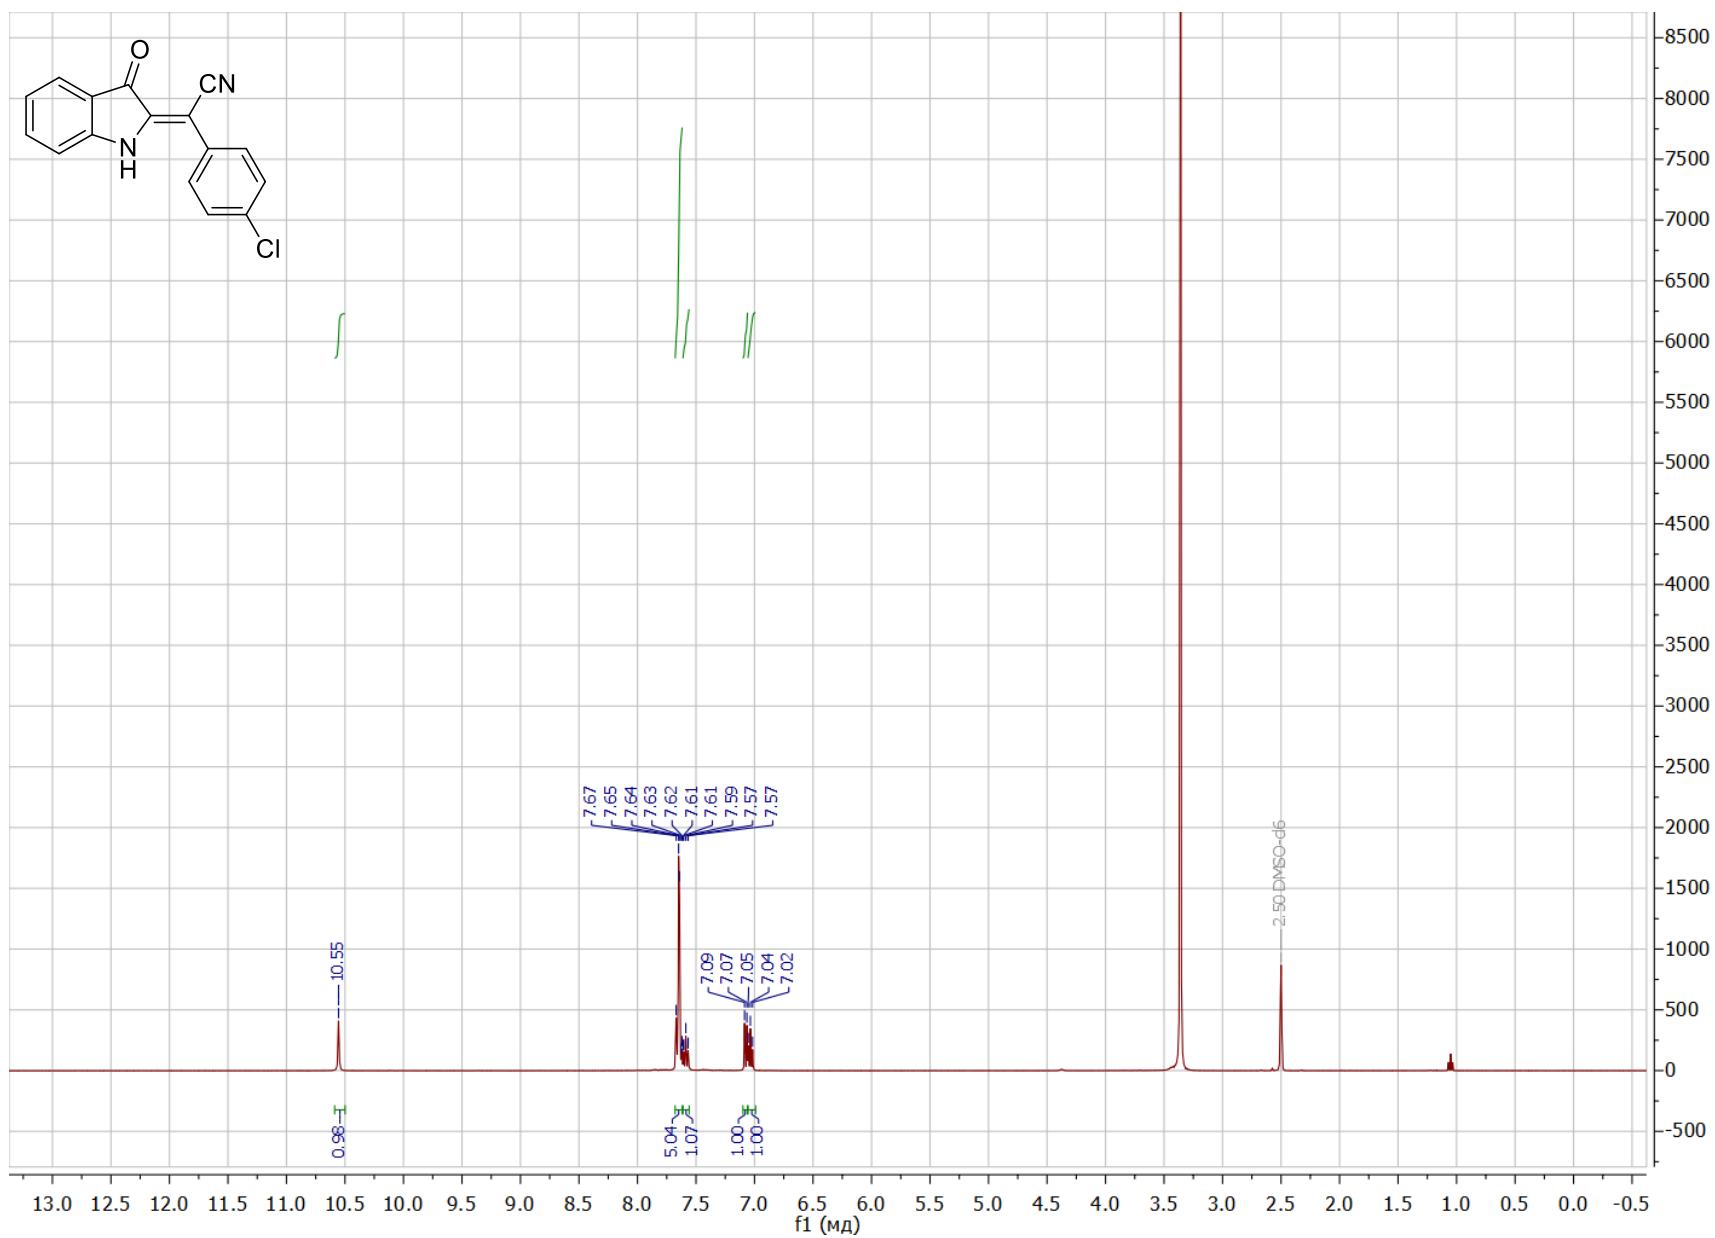

**Figure S17.** <sup>1</sup>H NMR spectrum of **2ai** in DMSO-*d*<sub>6</sub> (400 MHz)

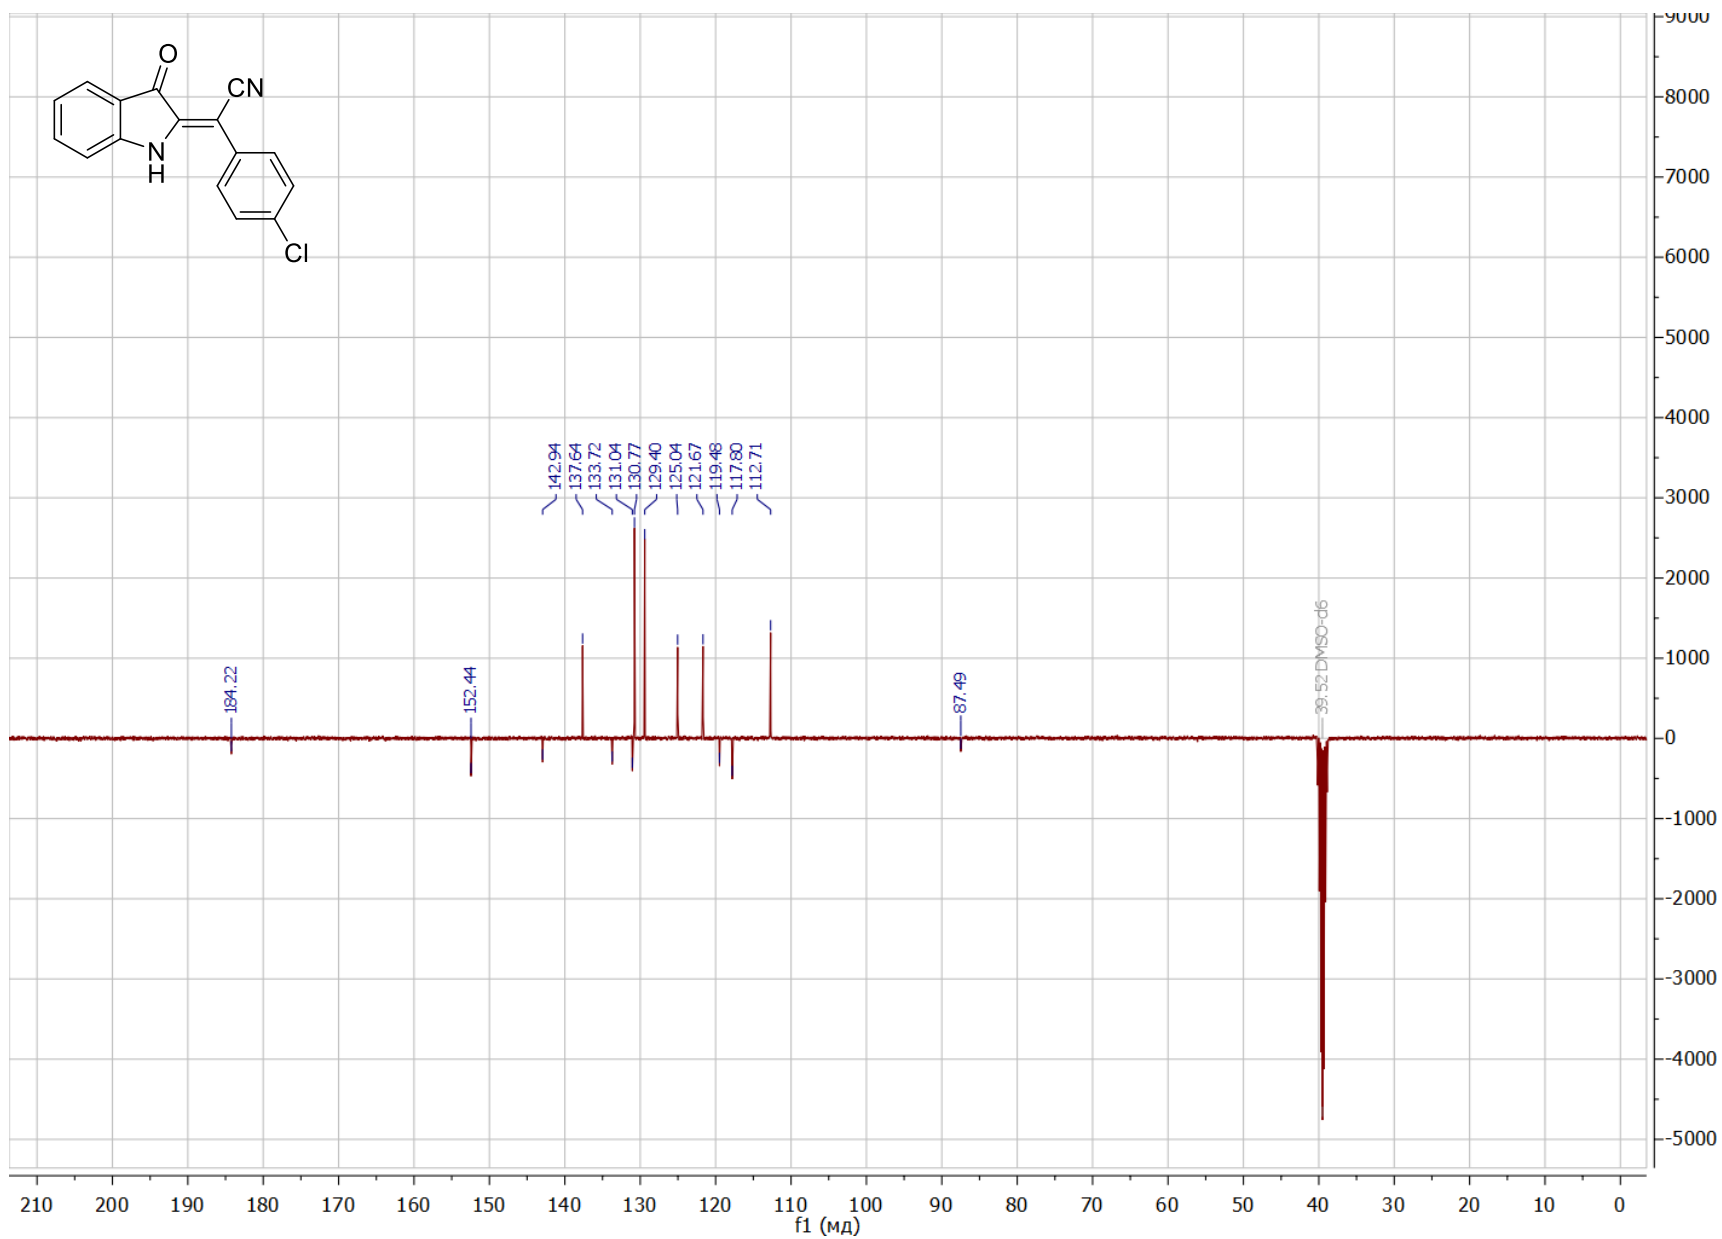

**Figure S18.**  $^{13}\text{C}$  DEPTQ NMR spectrum of **2ai** in  $\text{DMSO-}d_6$  (100 MHz)

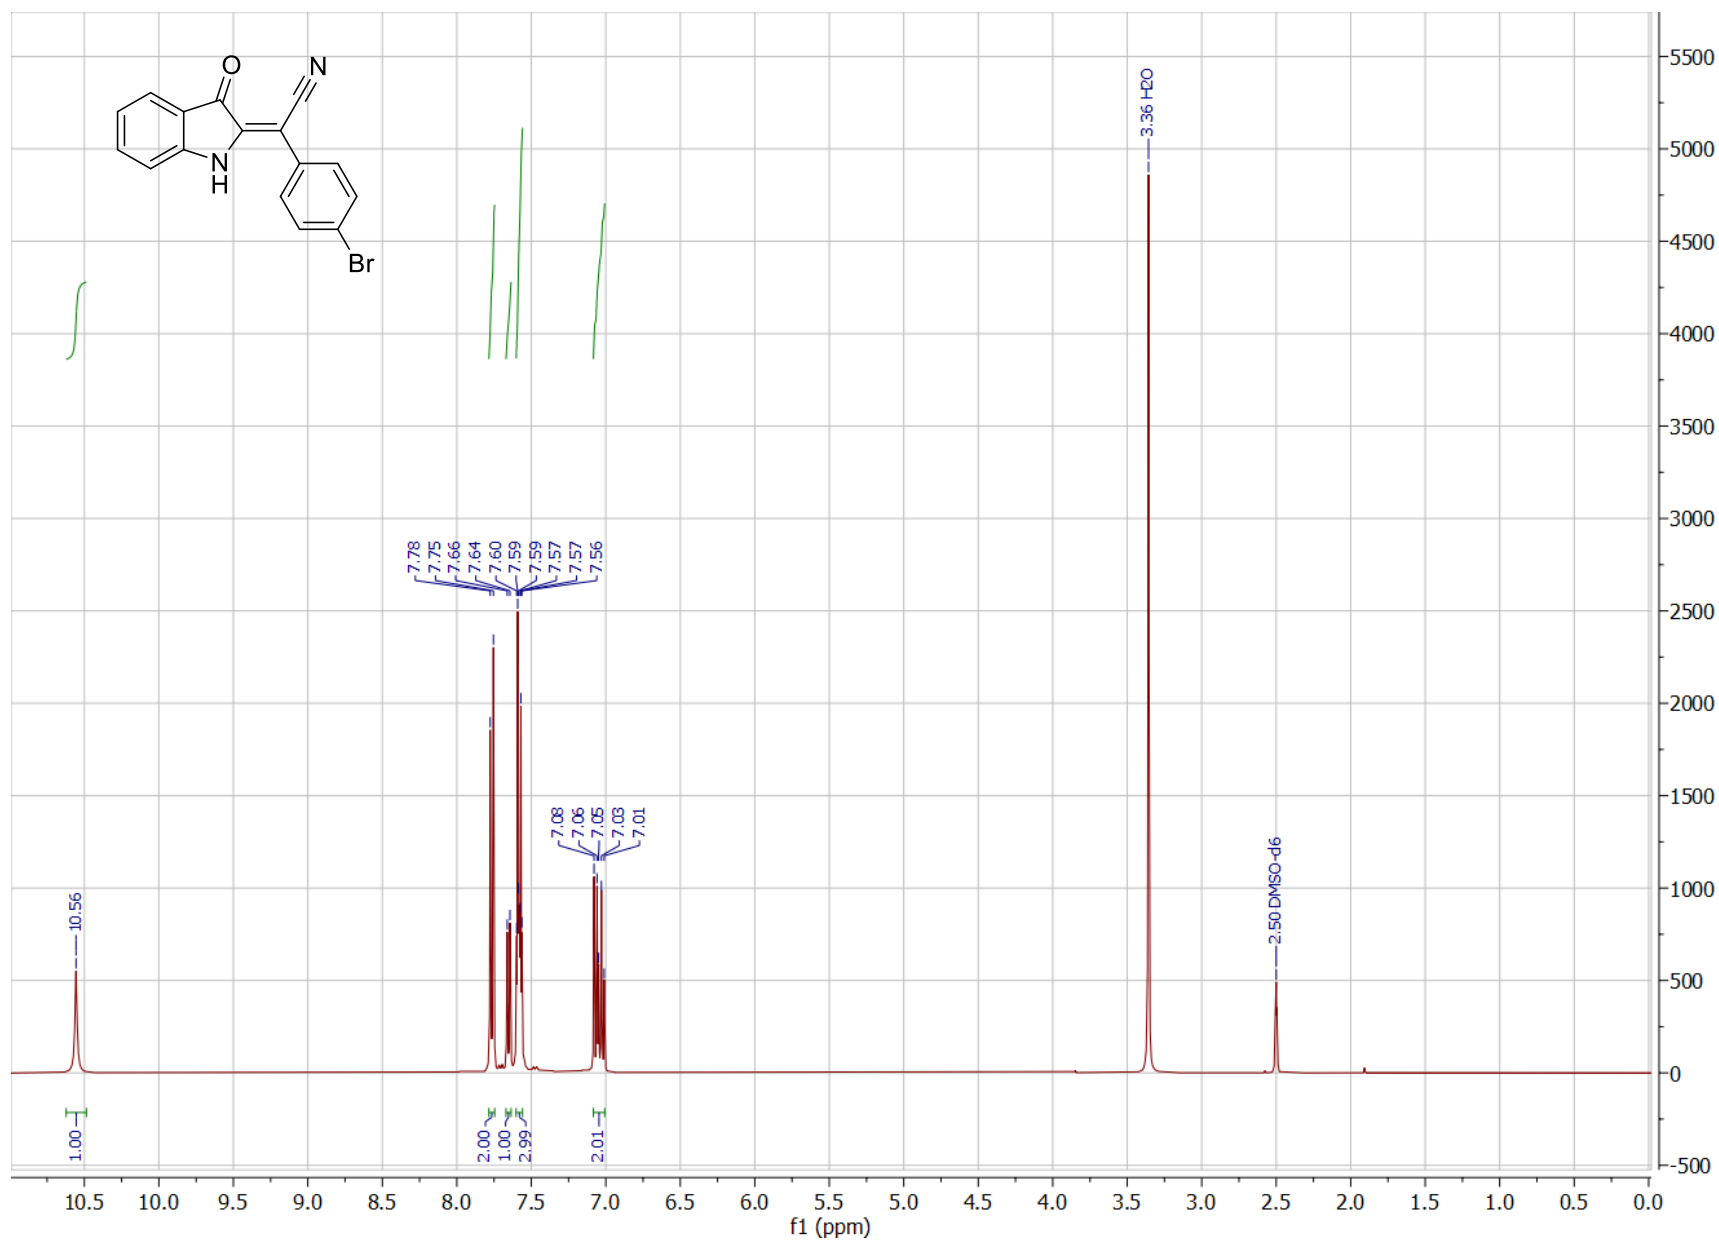

Figure S19. <sup>1</sup>H NMR spectrum of **2aj** in DMSO-*d*<sub>6</sub> (400 MHz)

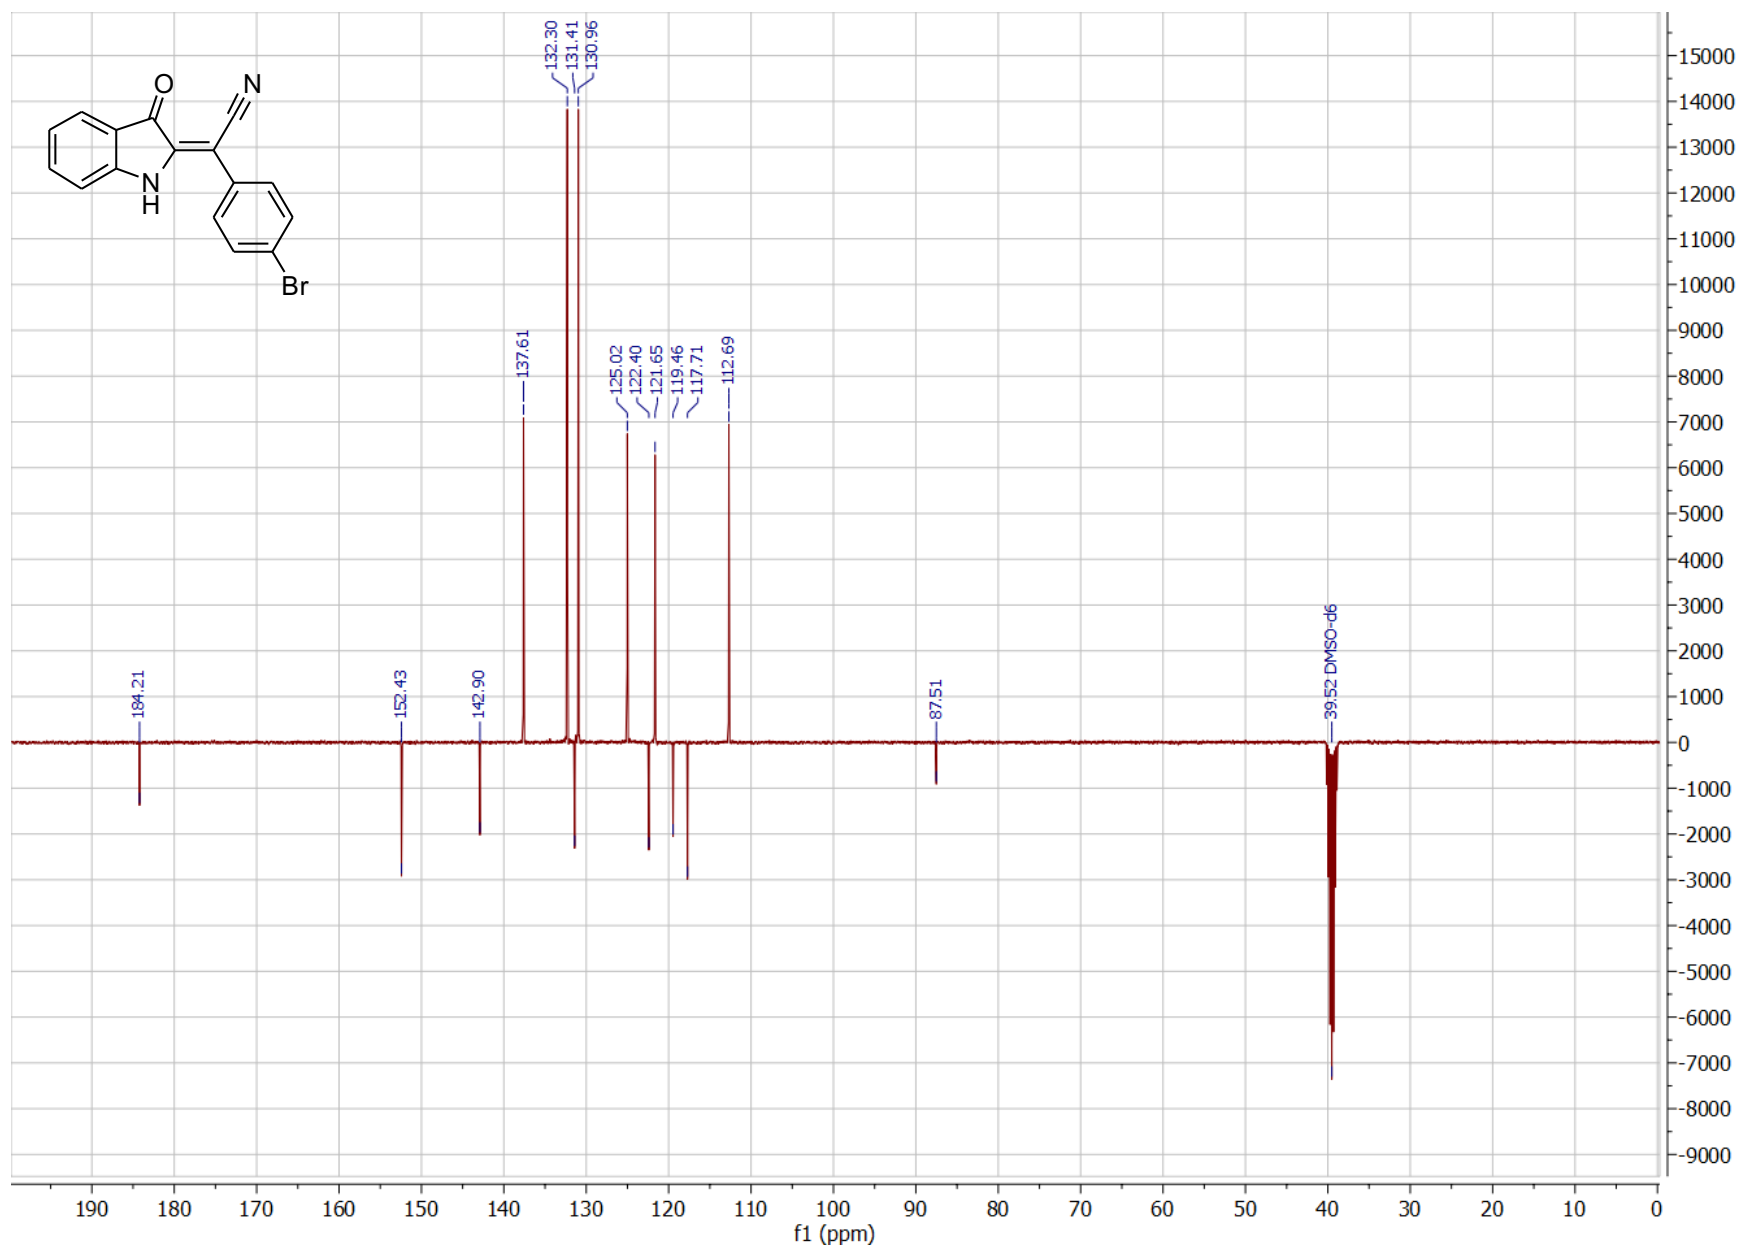

**Figure S20.** <sup>13</sup>C DEPTQ NMR spectrum of **2aj** in DMSO-*d*<sub>6</sub> (100 MHz)

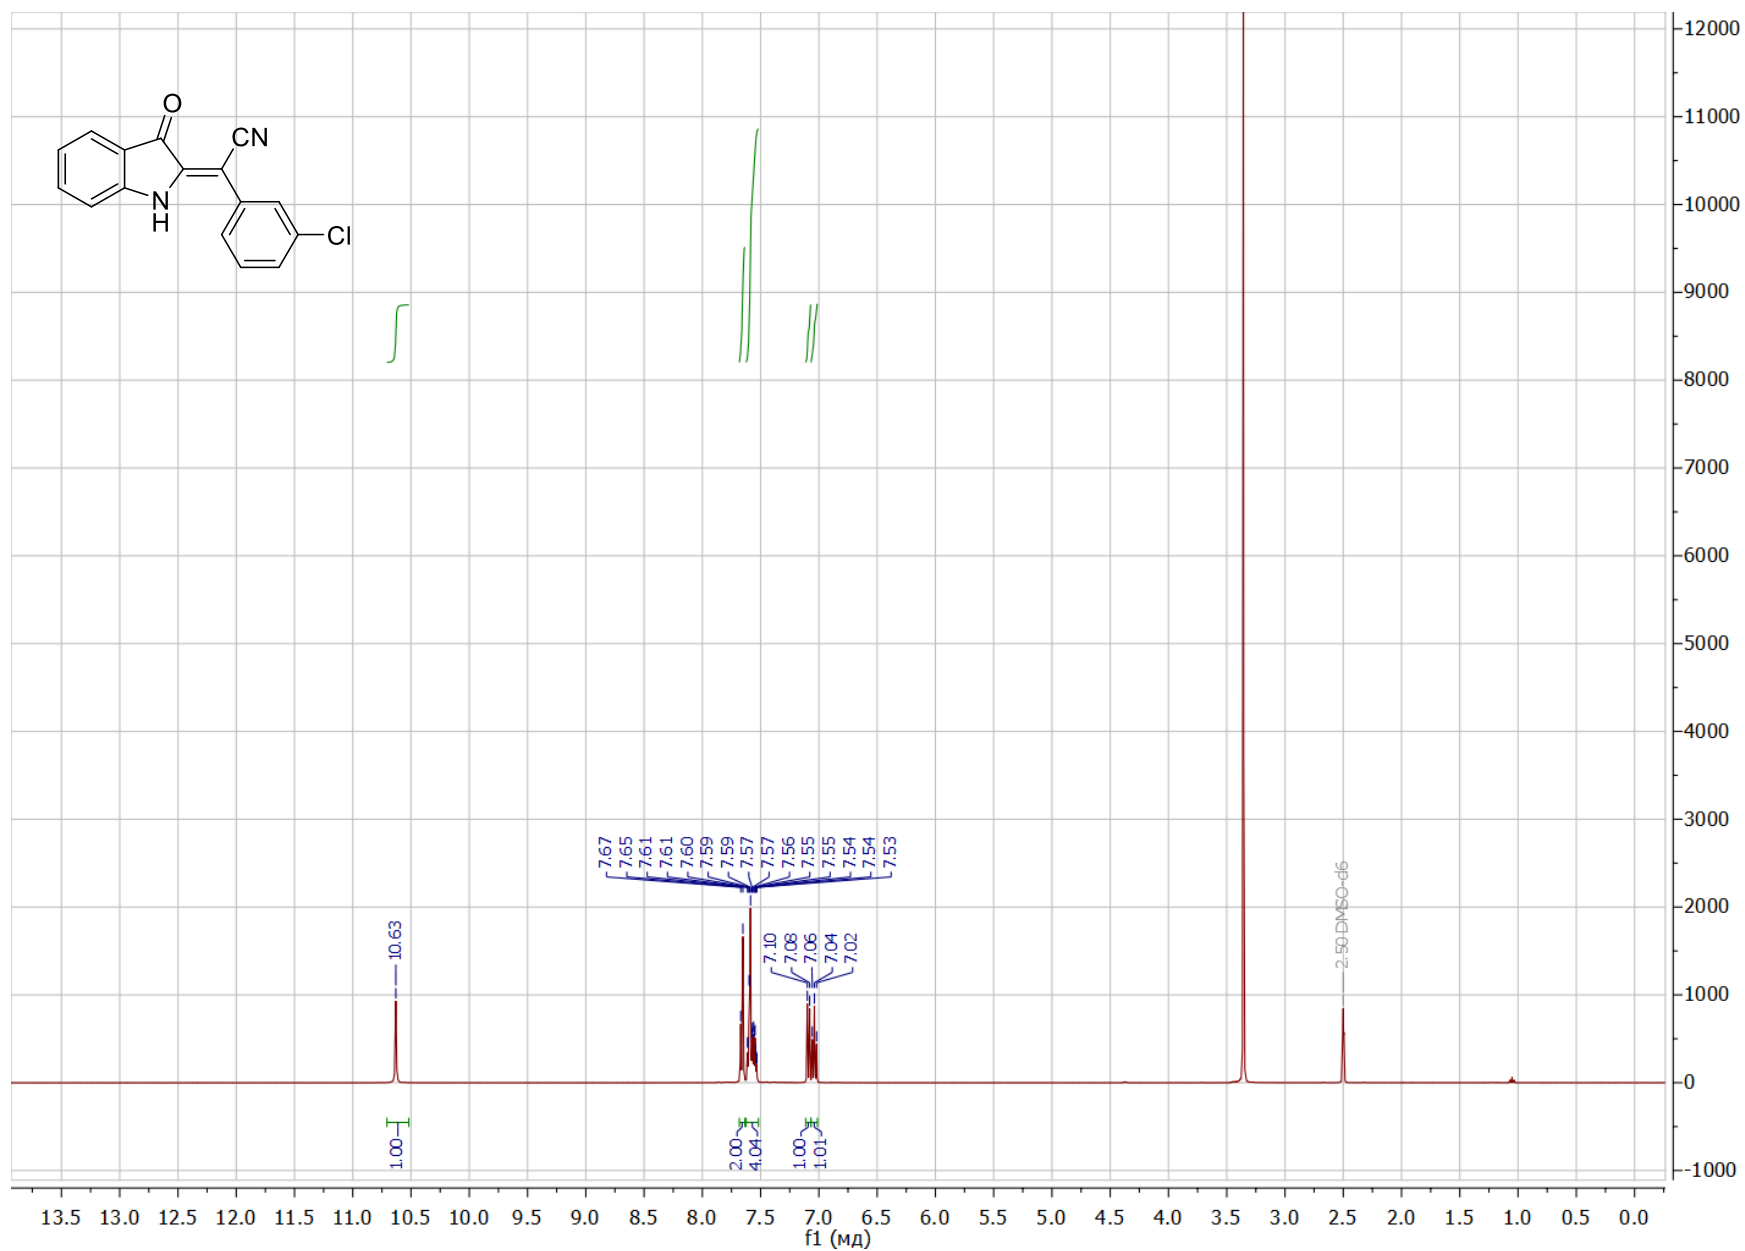

Figure S21. <sup>1</sup>H NMR spectrum of **2ak** in DMSO-*d*<sub>6</sub> (400 MHz)

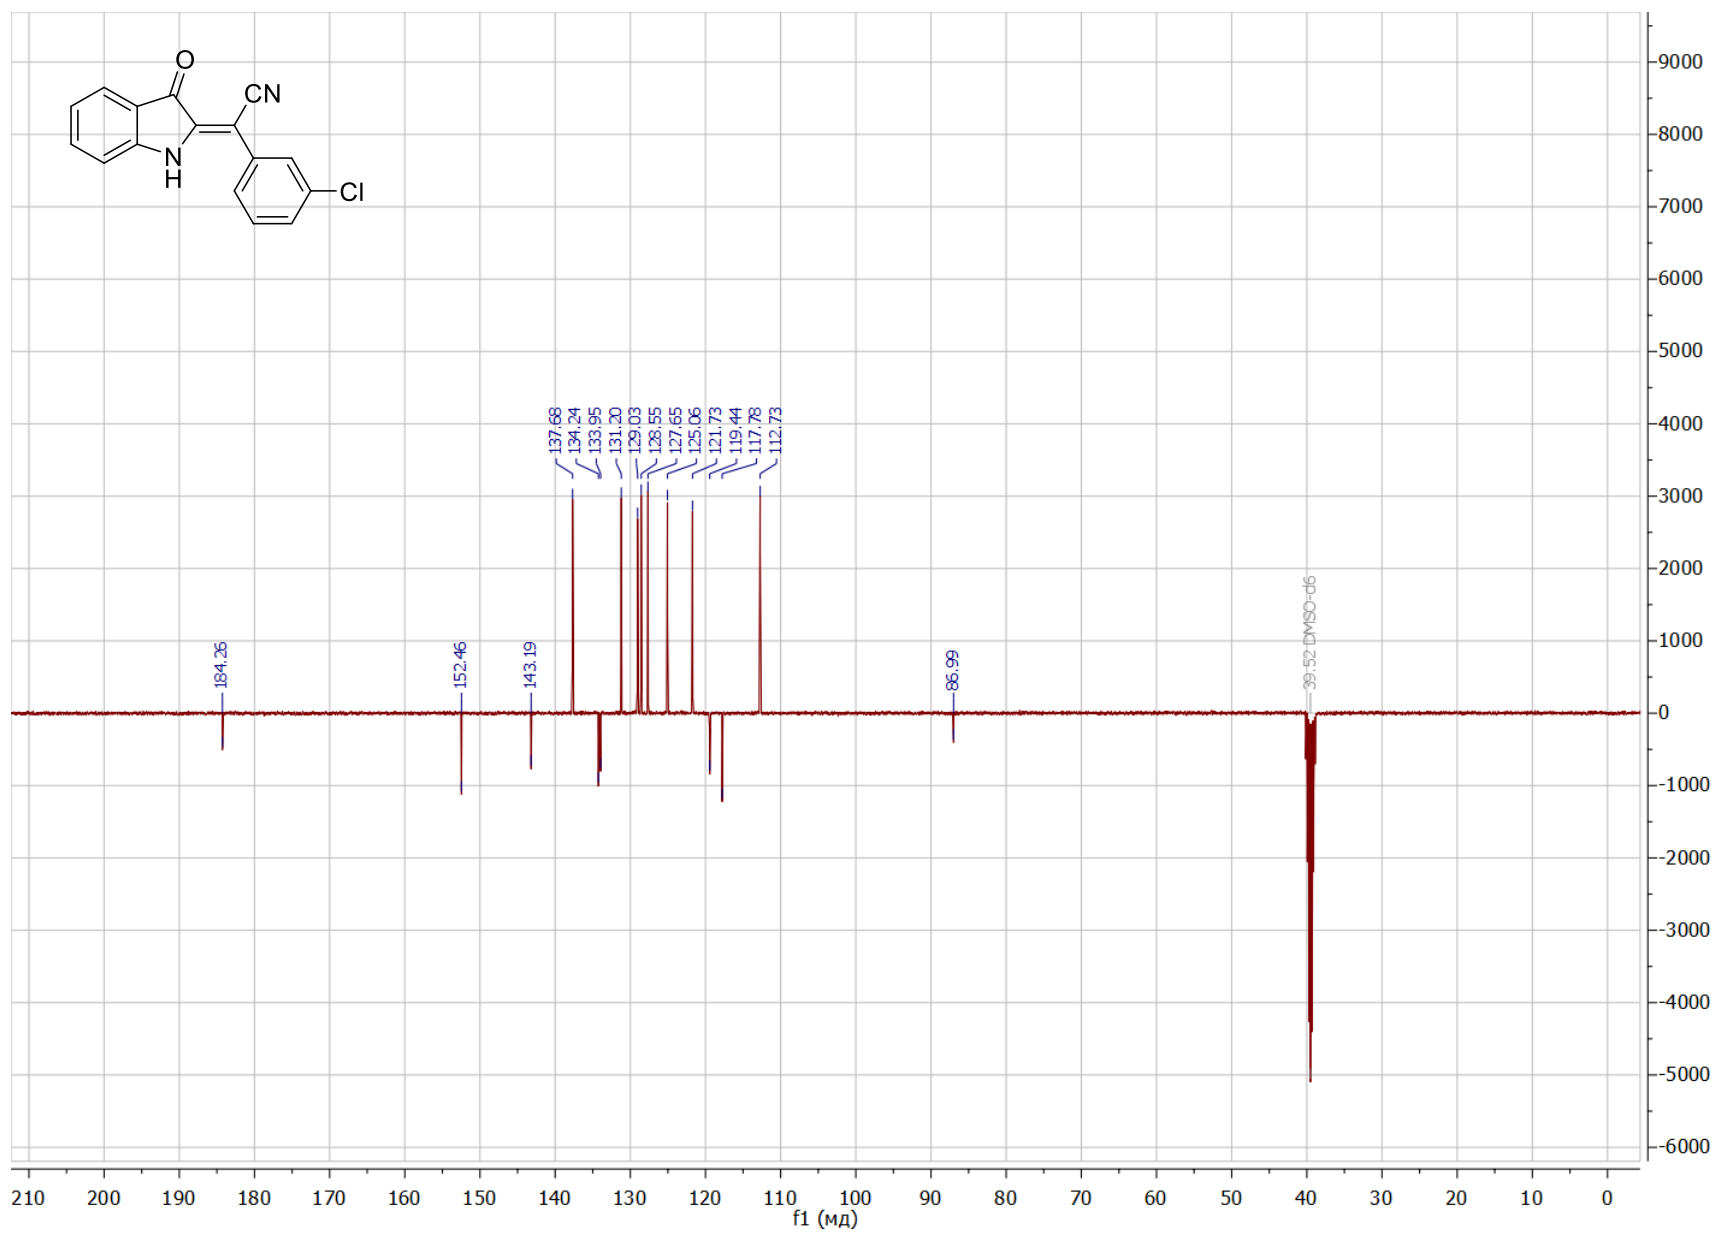

**Figure S22.** <sup>13</sup>C DEPTQ NMR spectrum of **2ak** in DMSO-*d*<sub>6</sub> (100 MHz)

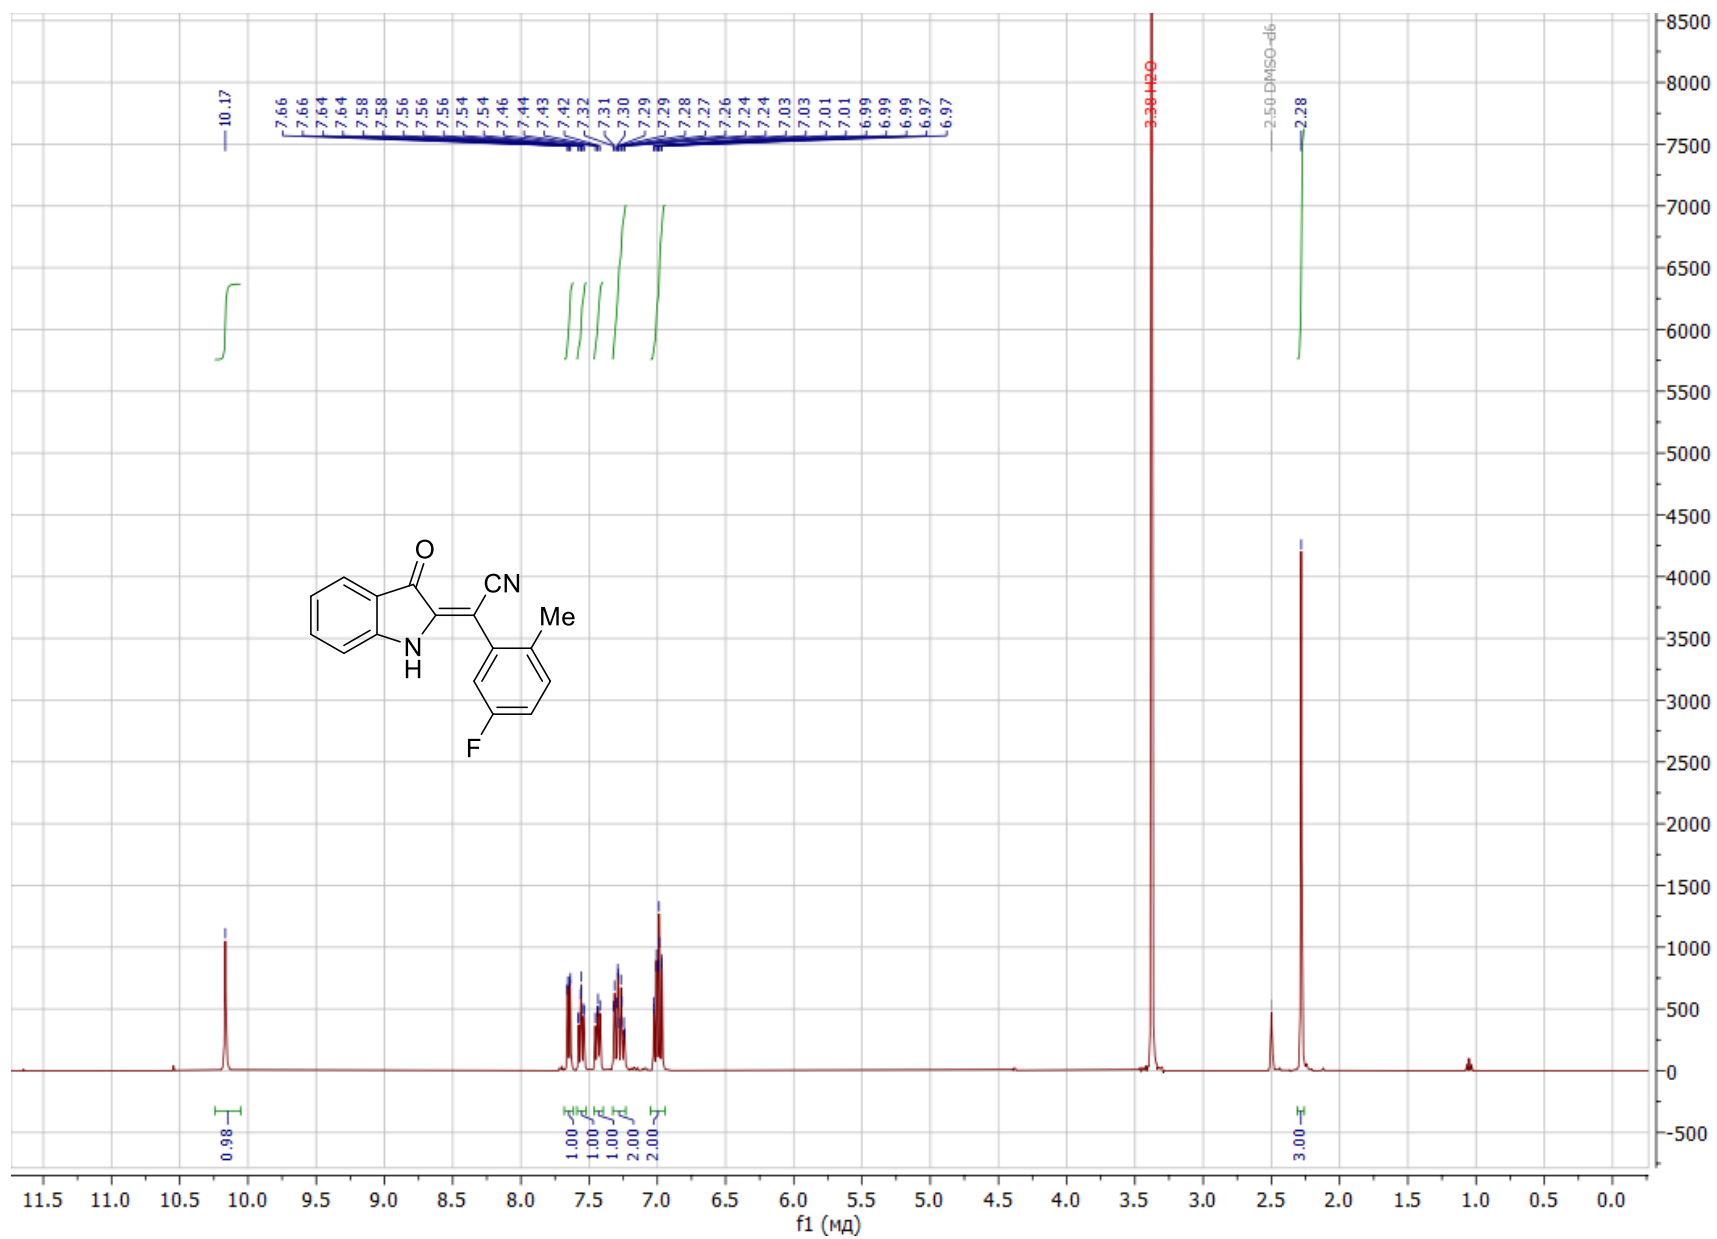

**Figure S23.** <sup>1</sup>H NMR spectrum of **2al** in DMSO-*d*<sub>6</sub> (400 MHz)

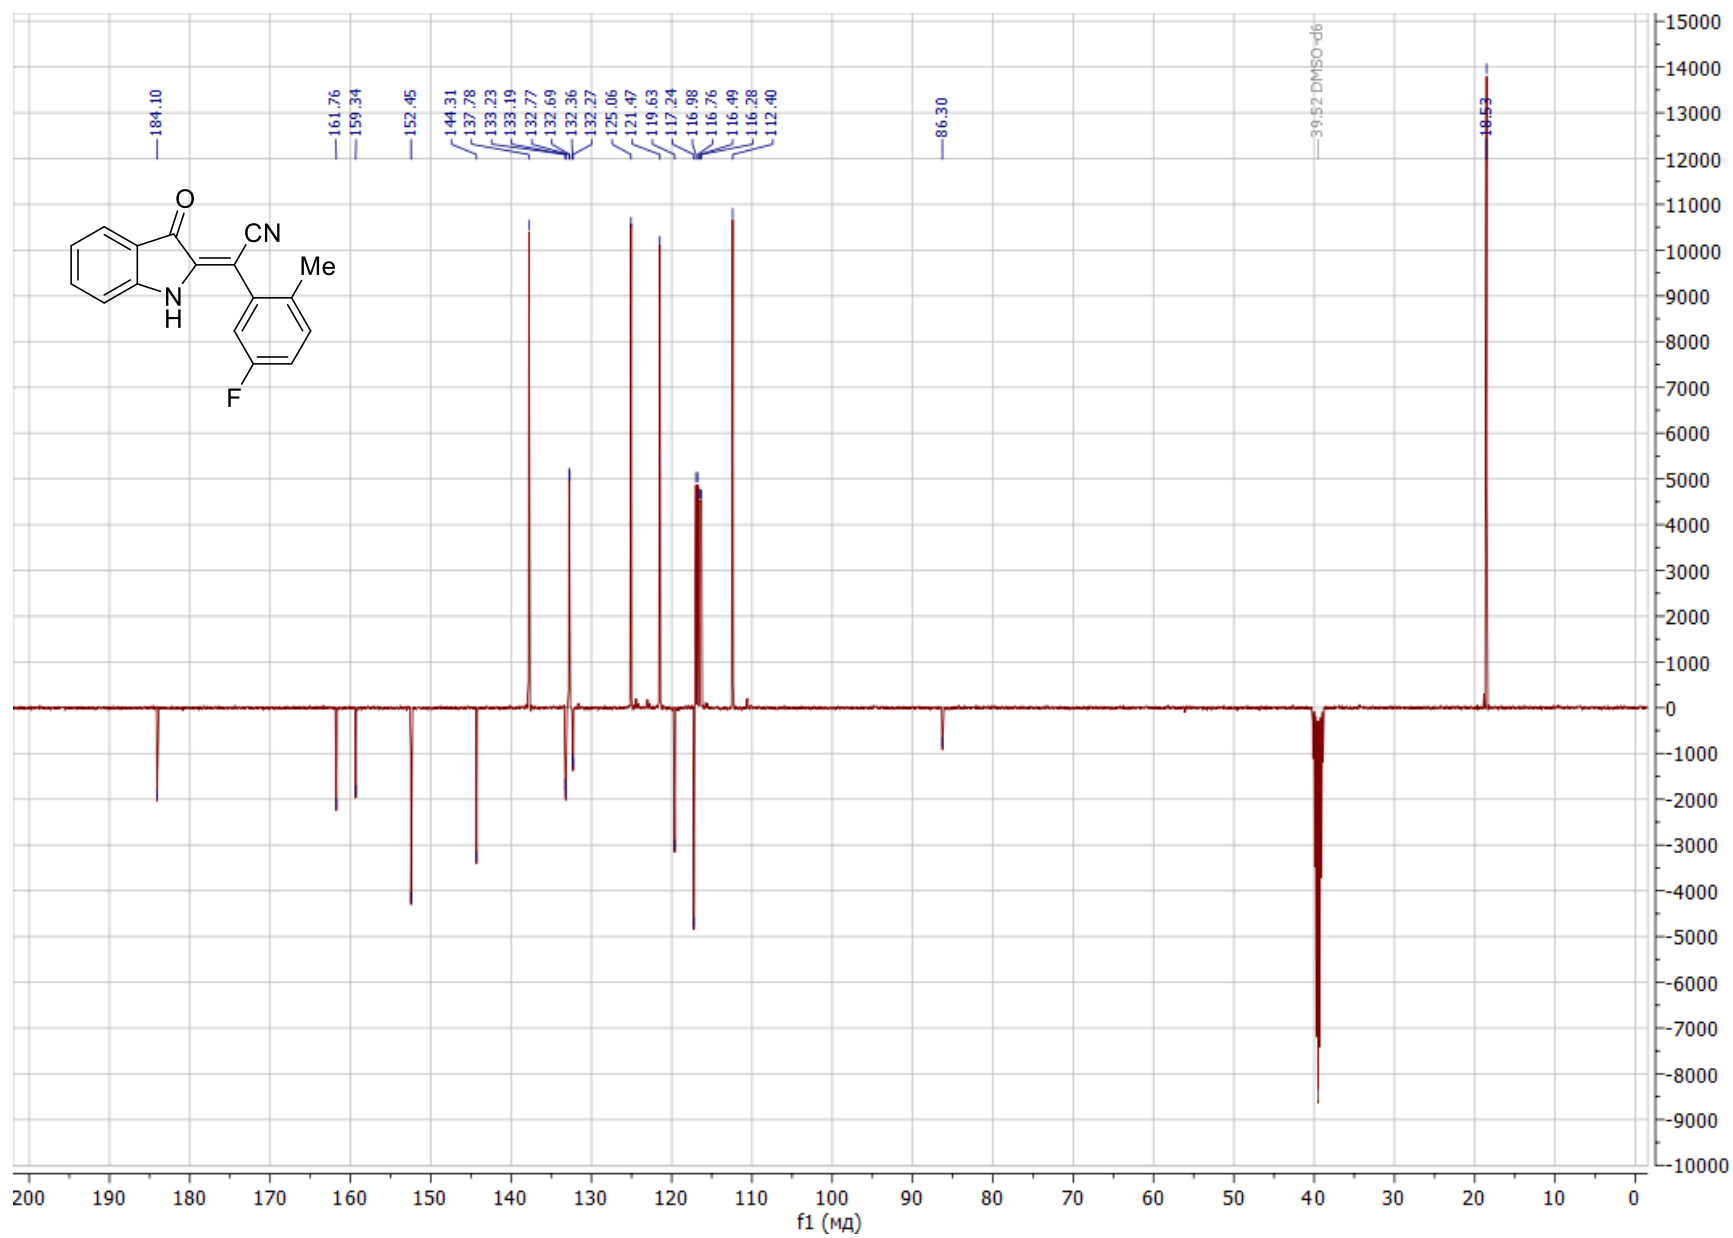

**Figure S24.**  $^{13}\text{C}$  DEPTQ NMR spectrum of **2al** in  $\text{DMSO}-d_6$  (100 MHz)

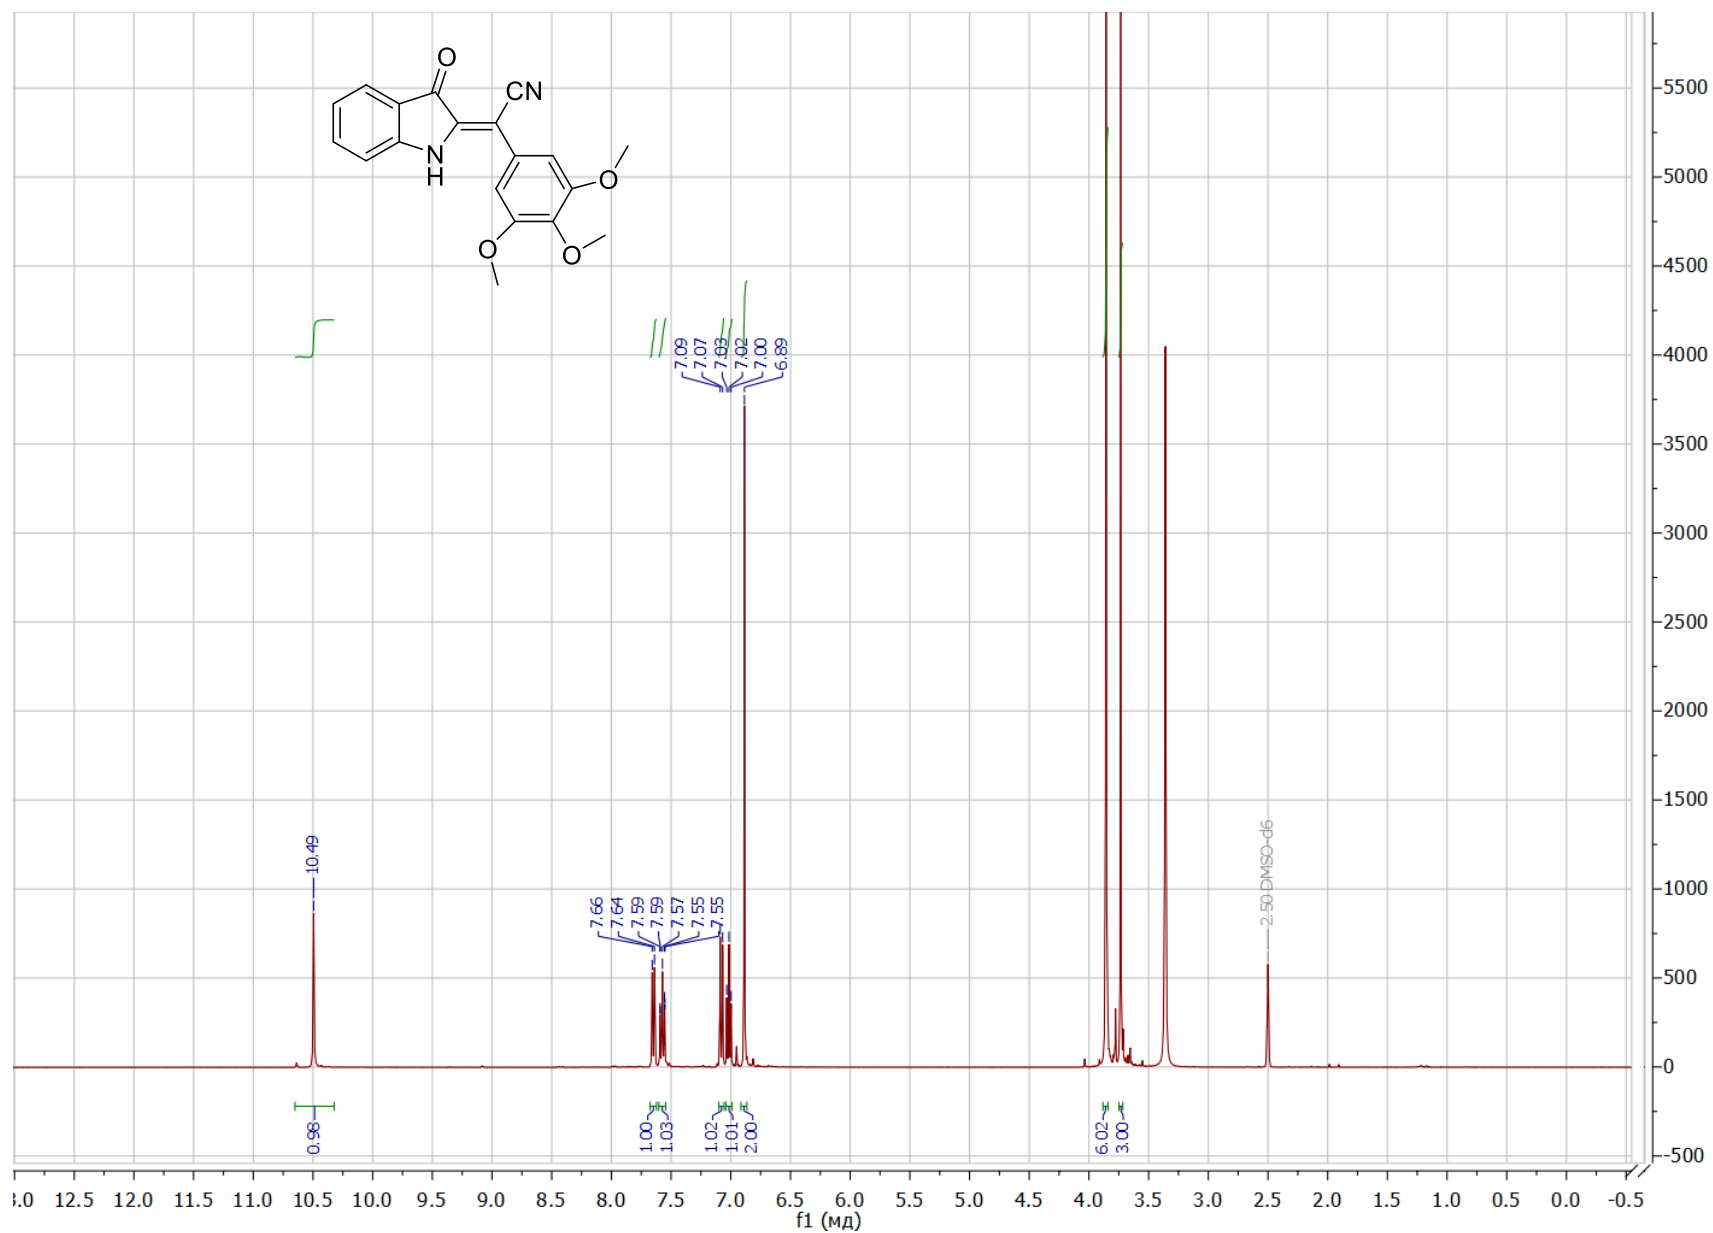

**Figure S25.** <sup>1</sup>H NMR spectrum of **2am** in DMSO-*d*<sub>6</sub> (400 MHz)

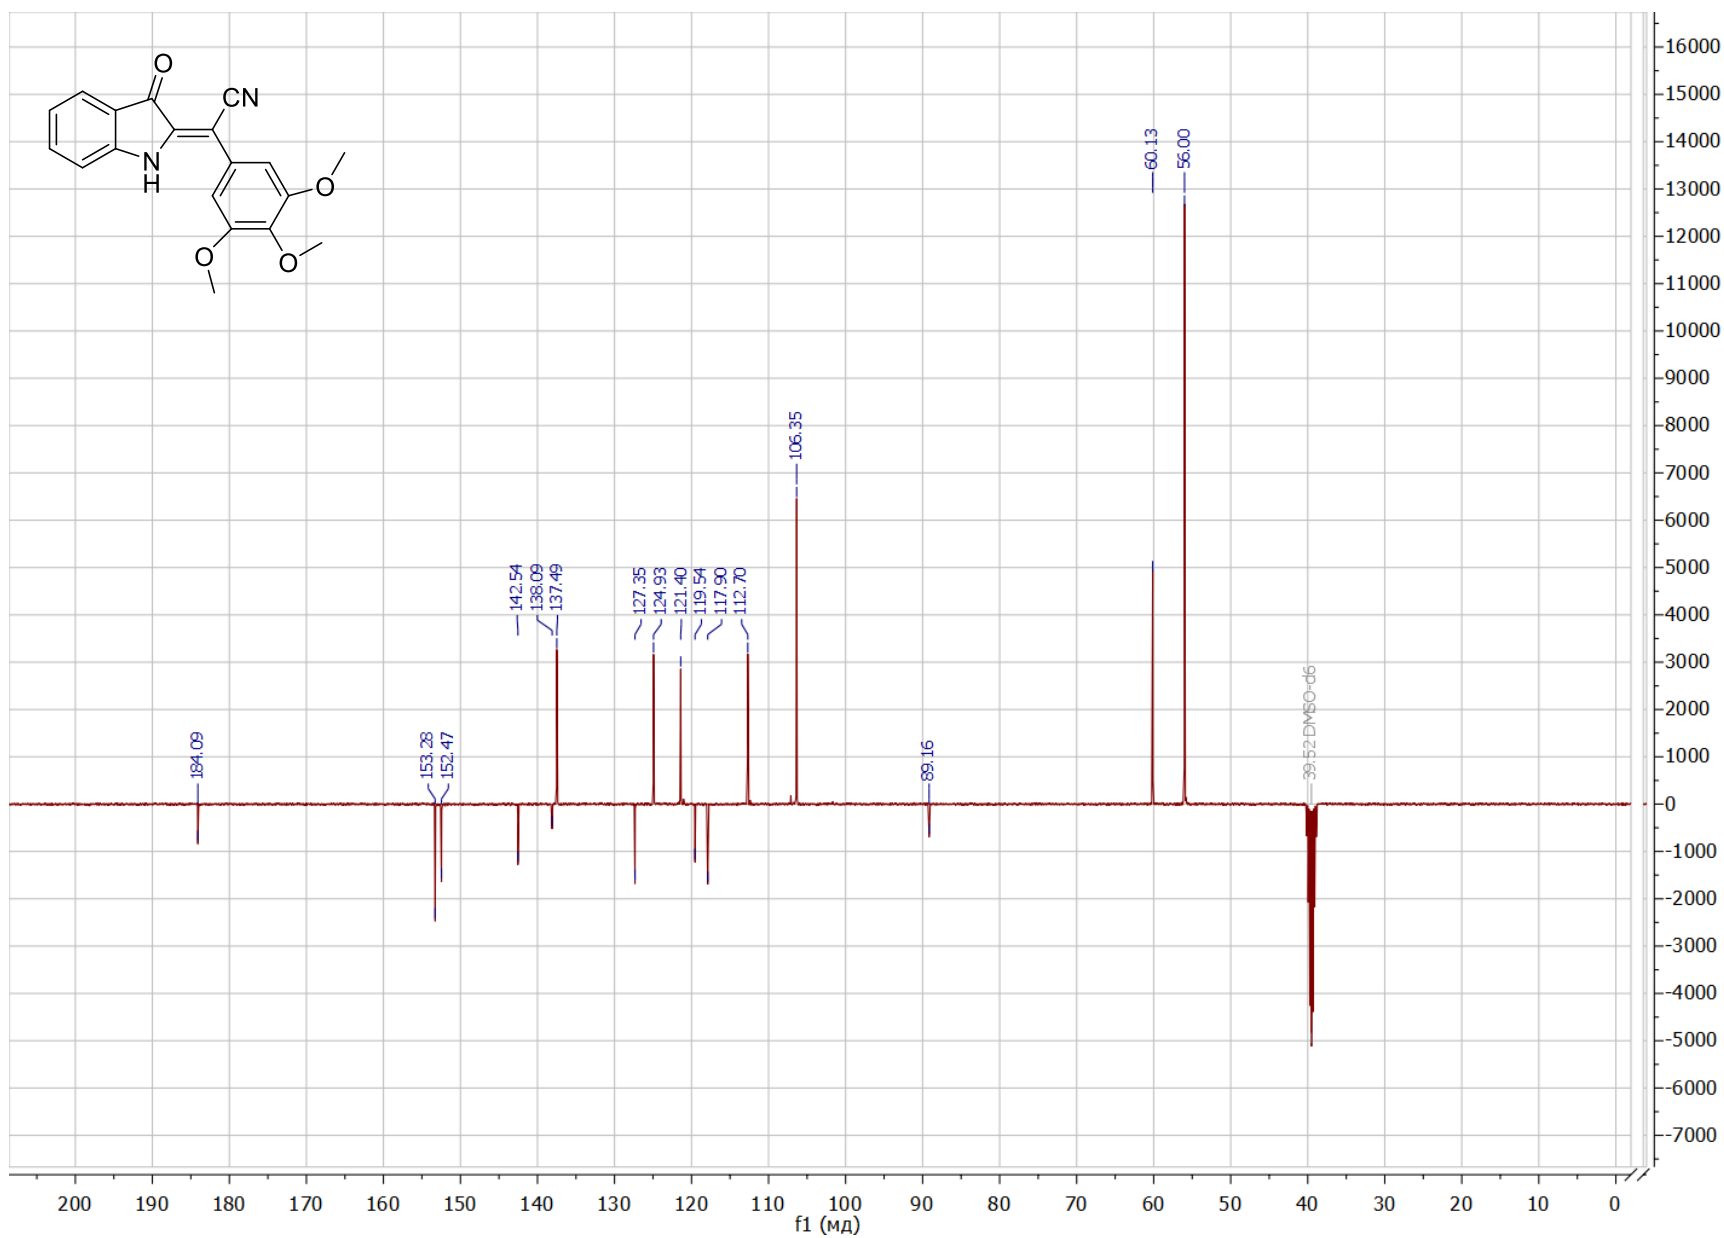

**Figure S26.**  $^{13}\text{C}$  DEPTQ NMR spectrum of **2am** in  $\text{DMSO-d}_6$  (100 MHz)

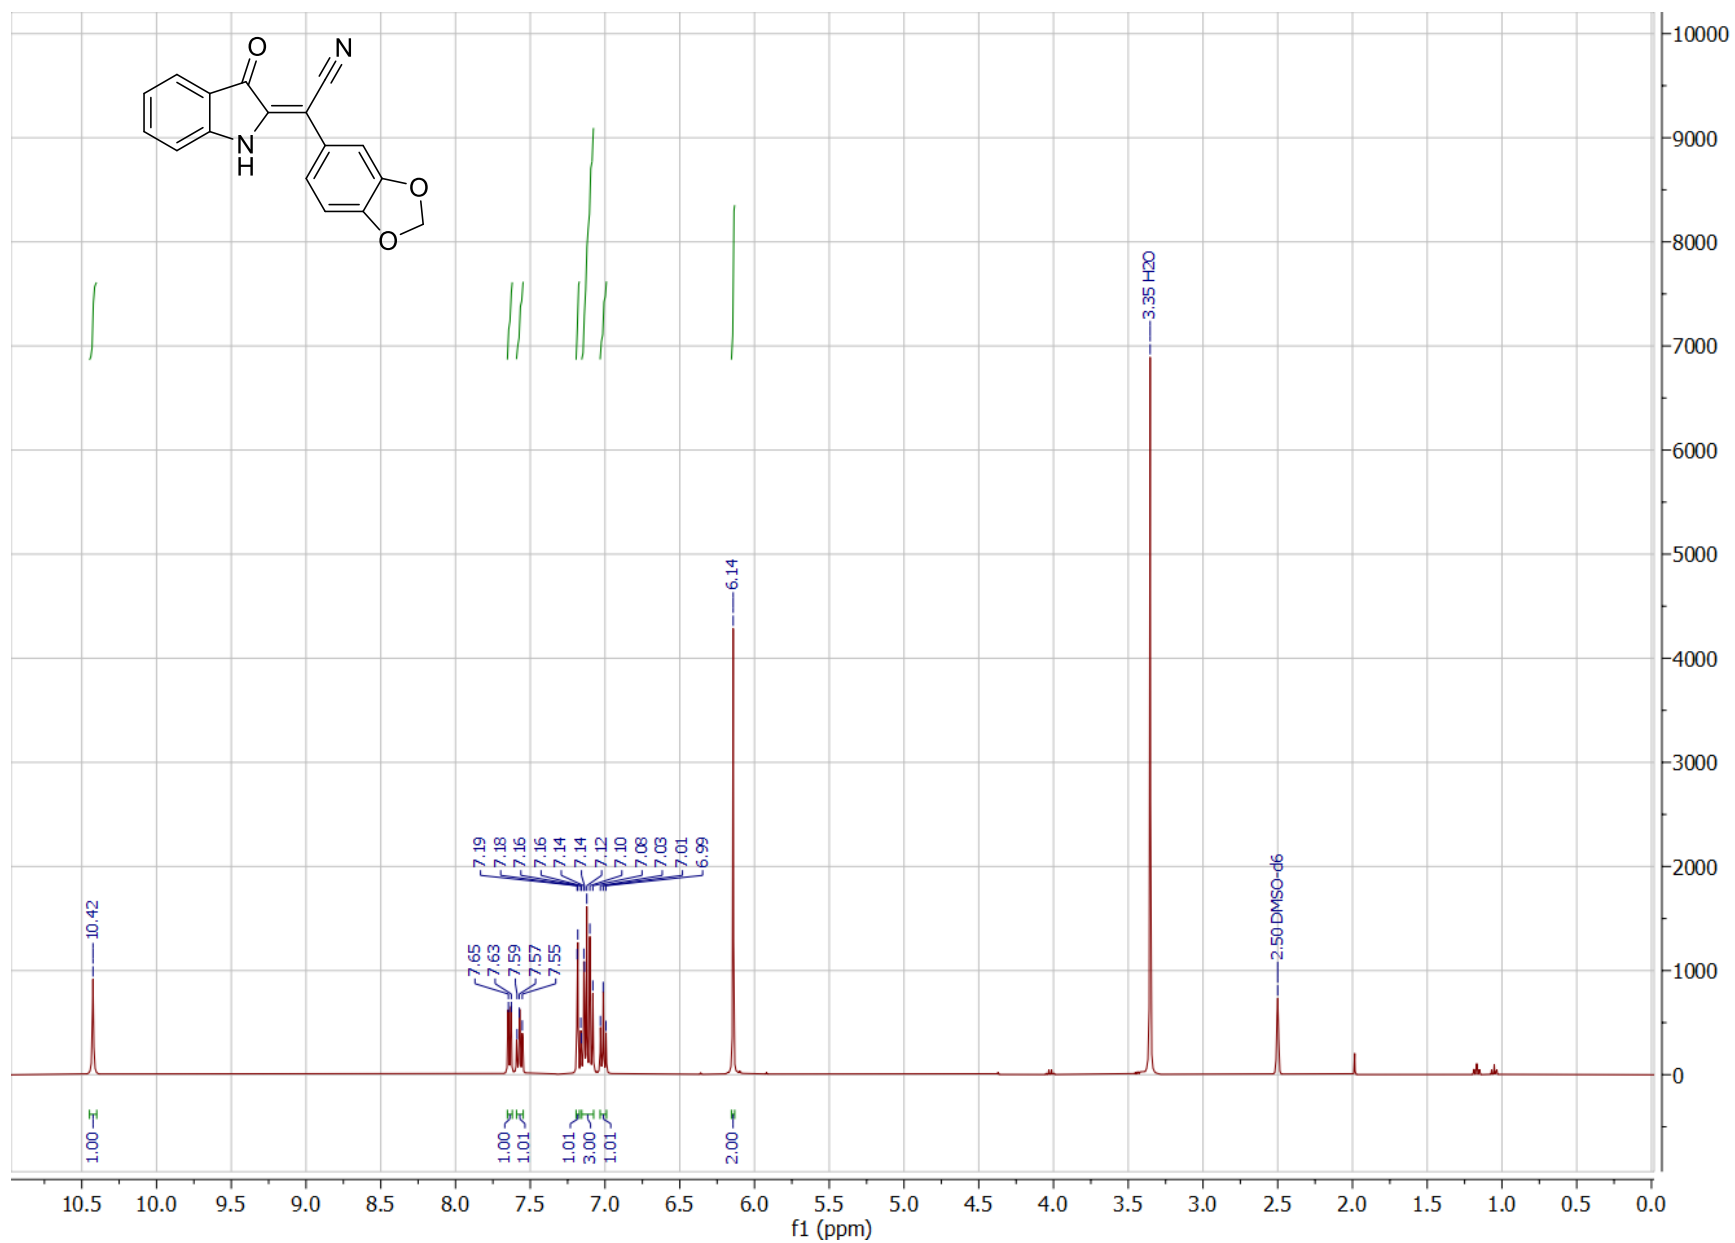

**Figure S27.** <sup>1</sup>H NMR spectrum of **2an** in DMSO-*d*<sub>6</sub> (400 MHz)

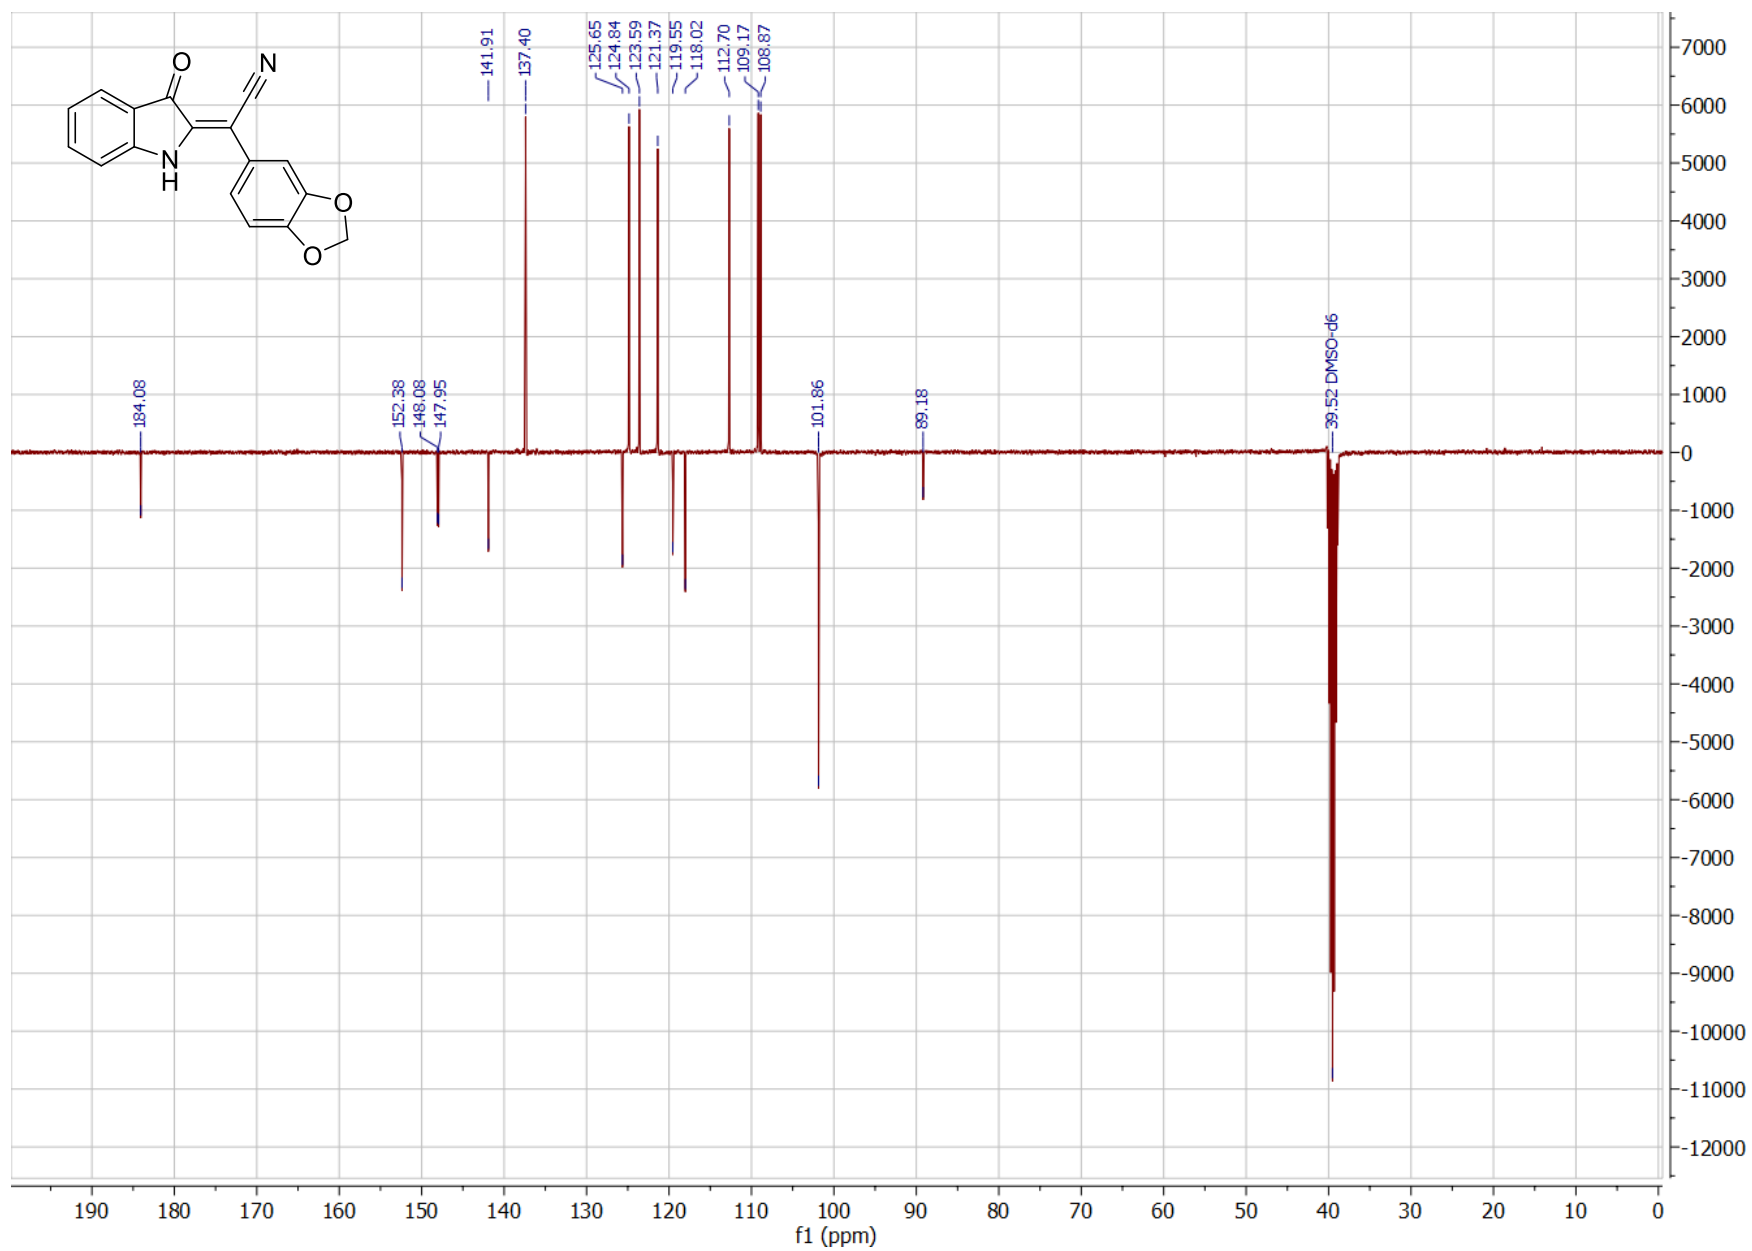

**Figure S28.**  $^{13}\text{C}$  DEPTQ NMR spectrum of **2an** in DMSO- $d_6$  (100 MHz)

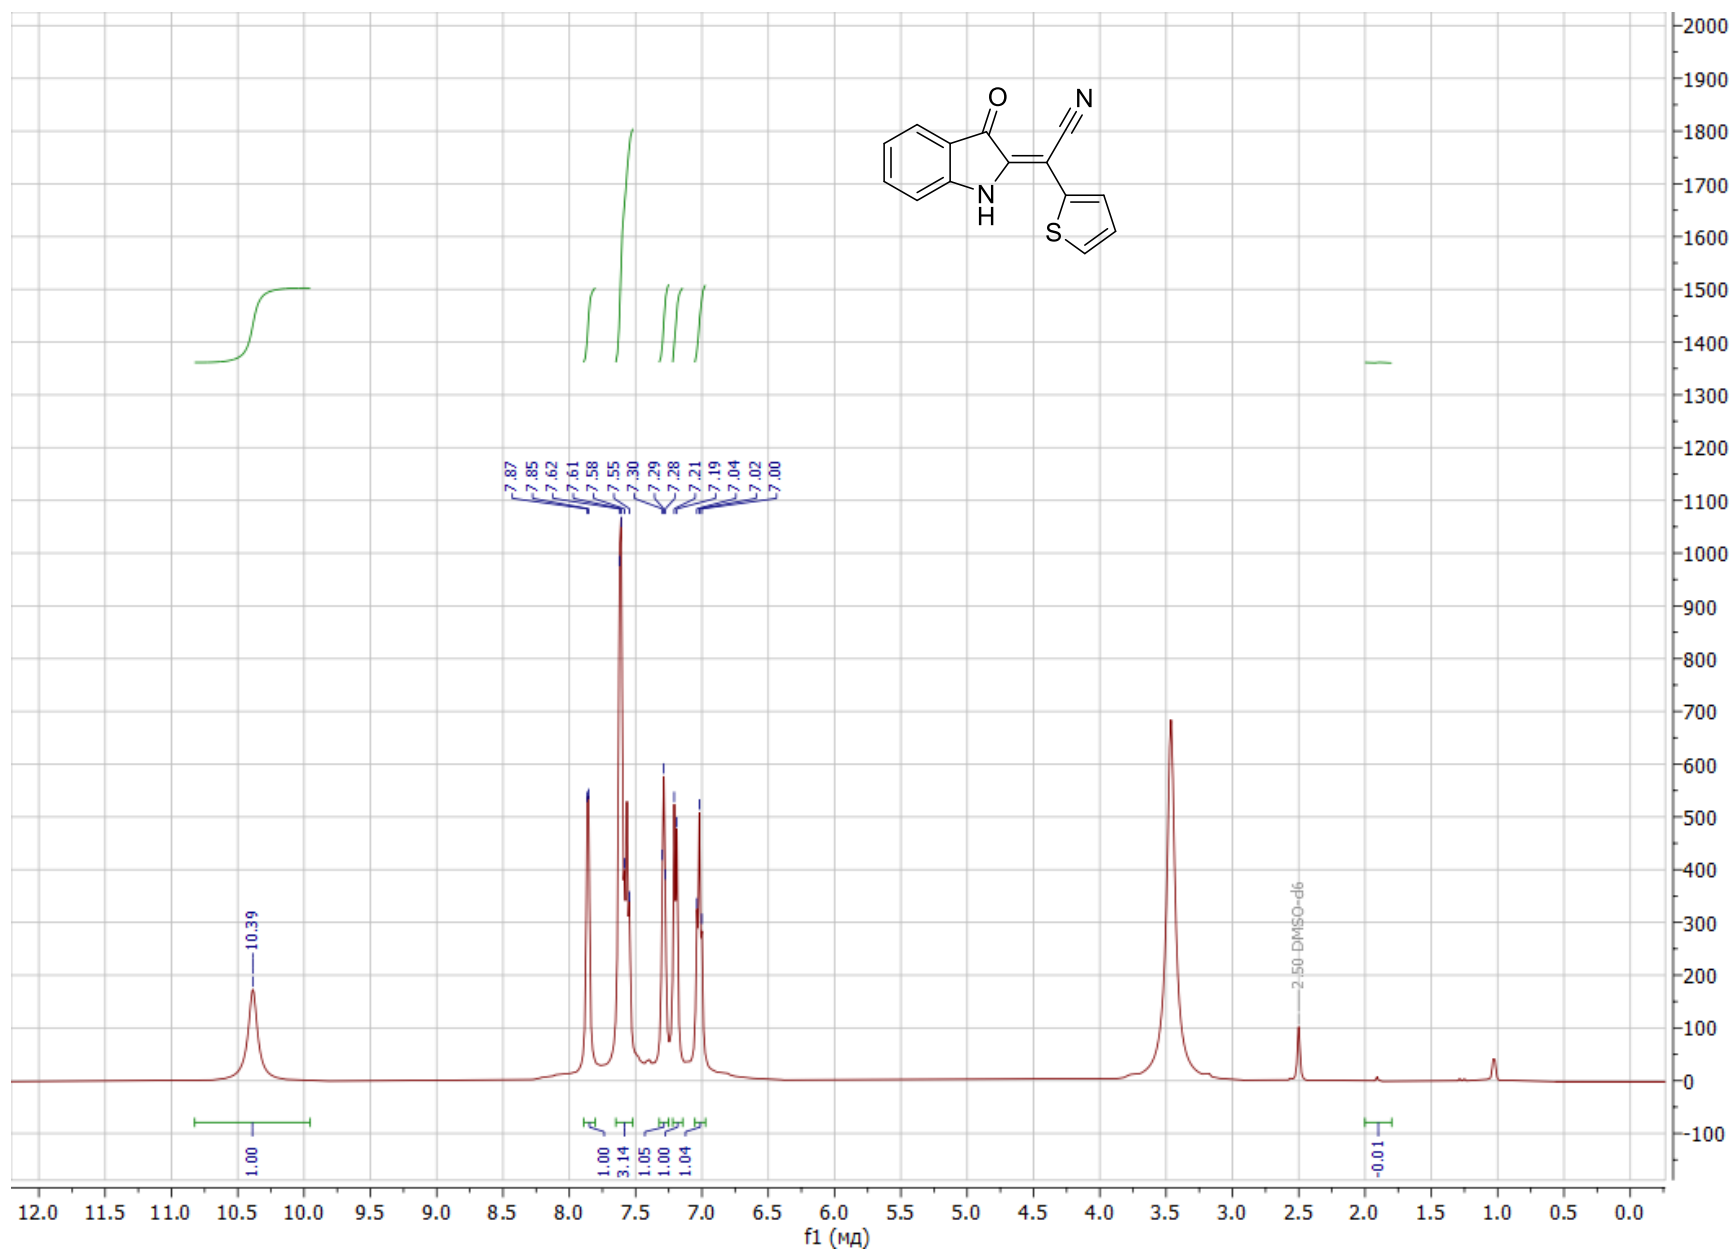

Figure S29. <sup>1</sup>H NMR spectrum of **2ao** in DMSO-*d*<sub>6</sub> (400 MHz)

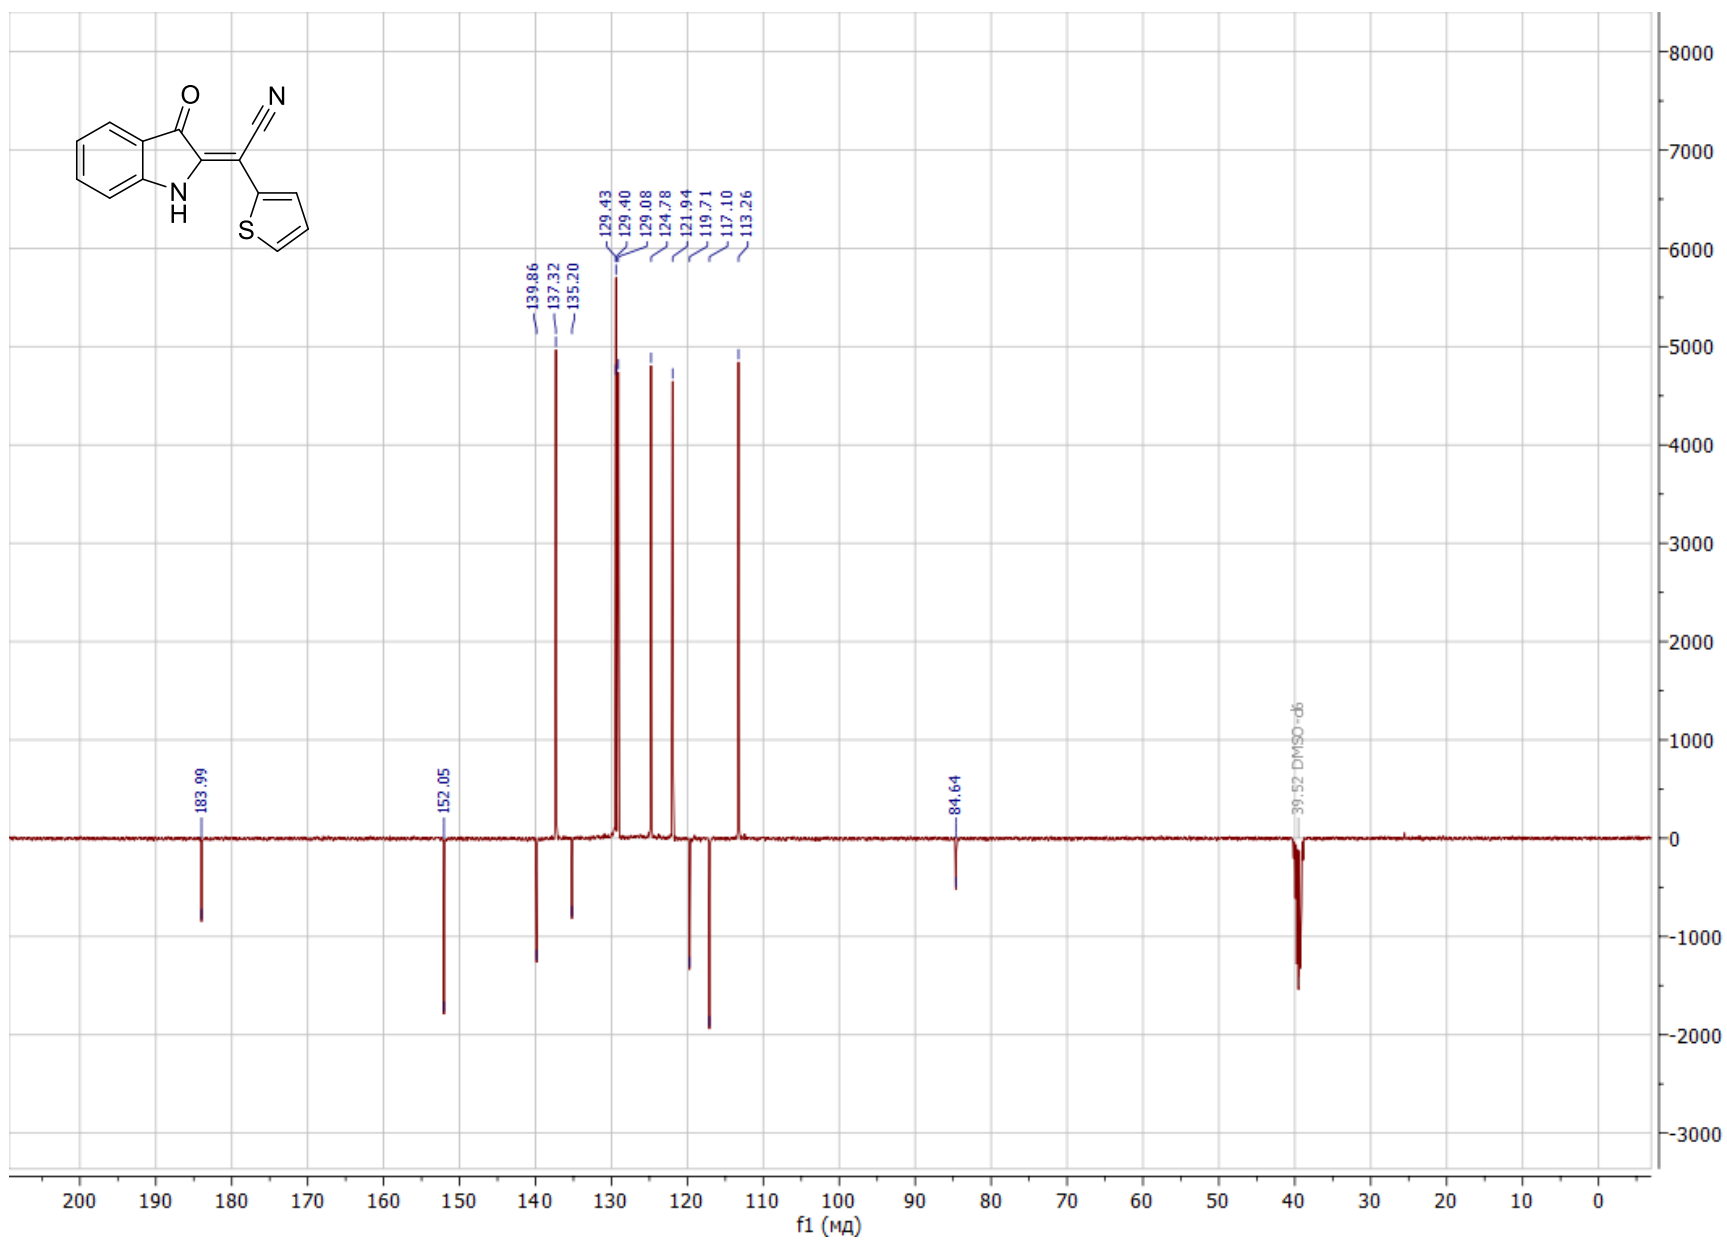

**Figure S30.**  $^{13}\text{C}$  DEPTQ NMR spectrum of **2ao** in  $\text{DMSO-}d_6$  (100 MHz)

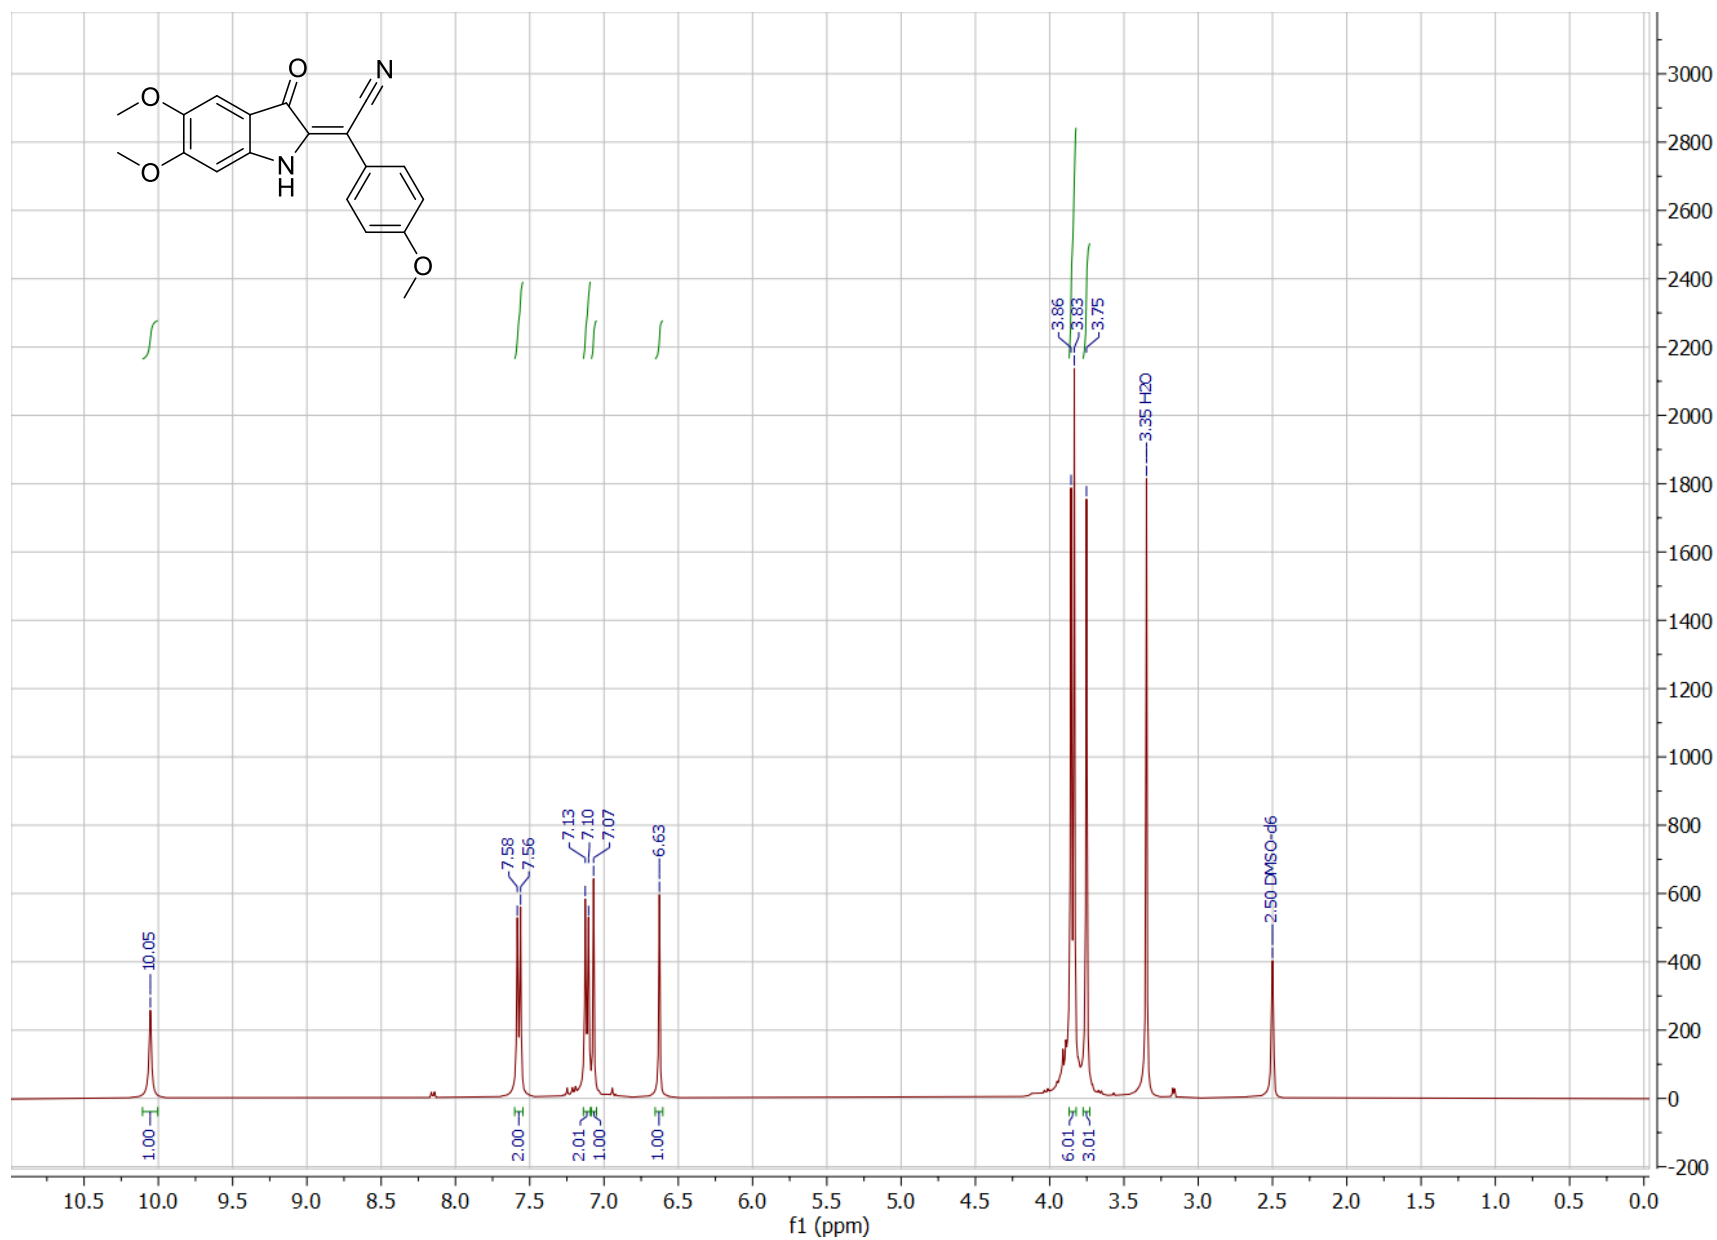

**Figure S31.** <sup>1</sup>H NMR spectrum of **2ba** in DMSO-*d*<sub>6</sub> (400 MHz)

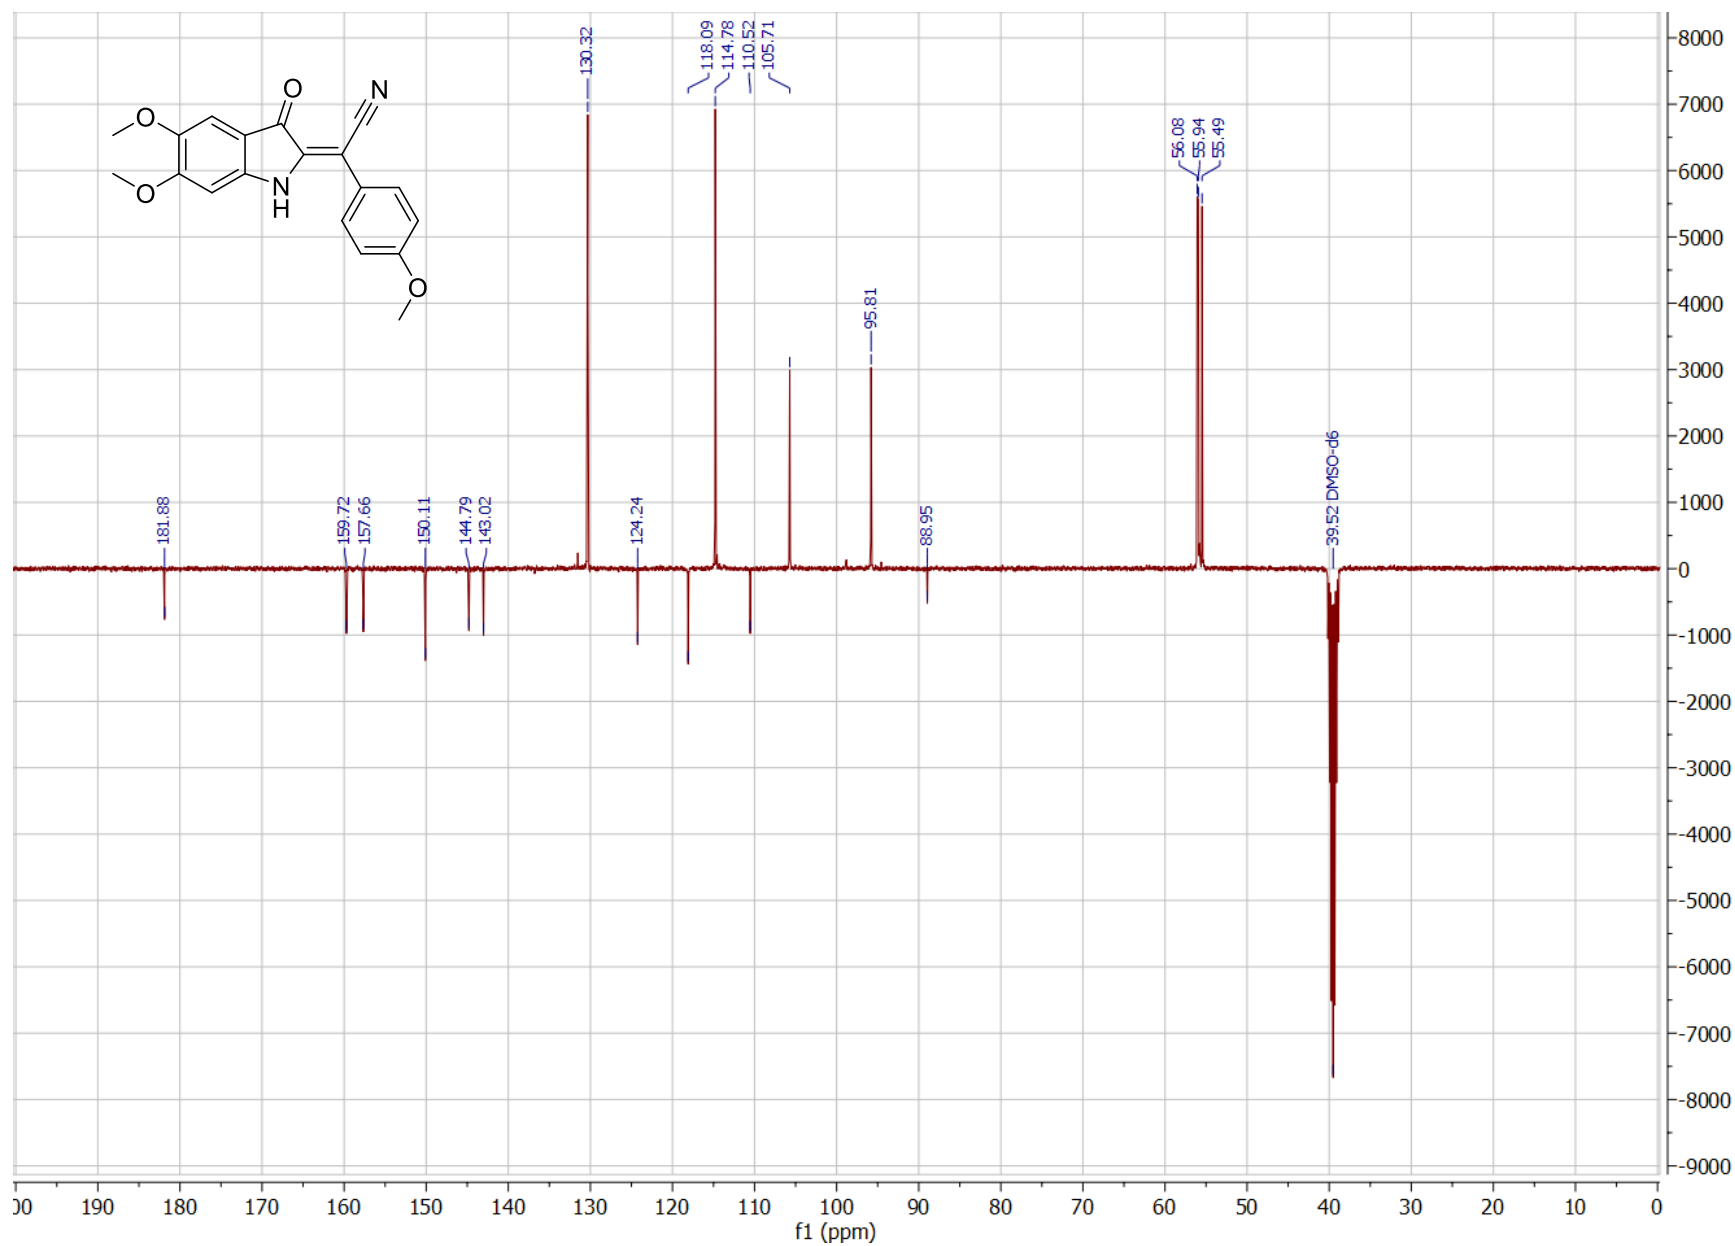

**Figure S32.**  $^{13}\text{C}$  DEPTQ NMR spectrum of **2ba** in  $\text{DMSO}-d_6$  (100 MHz)

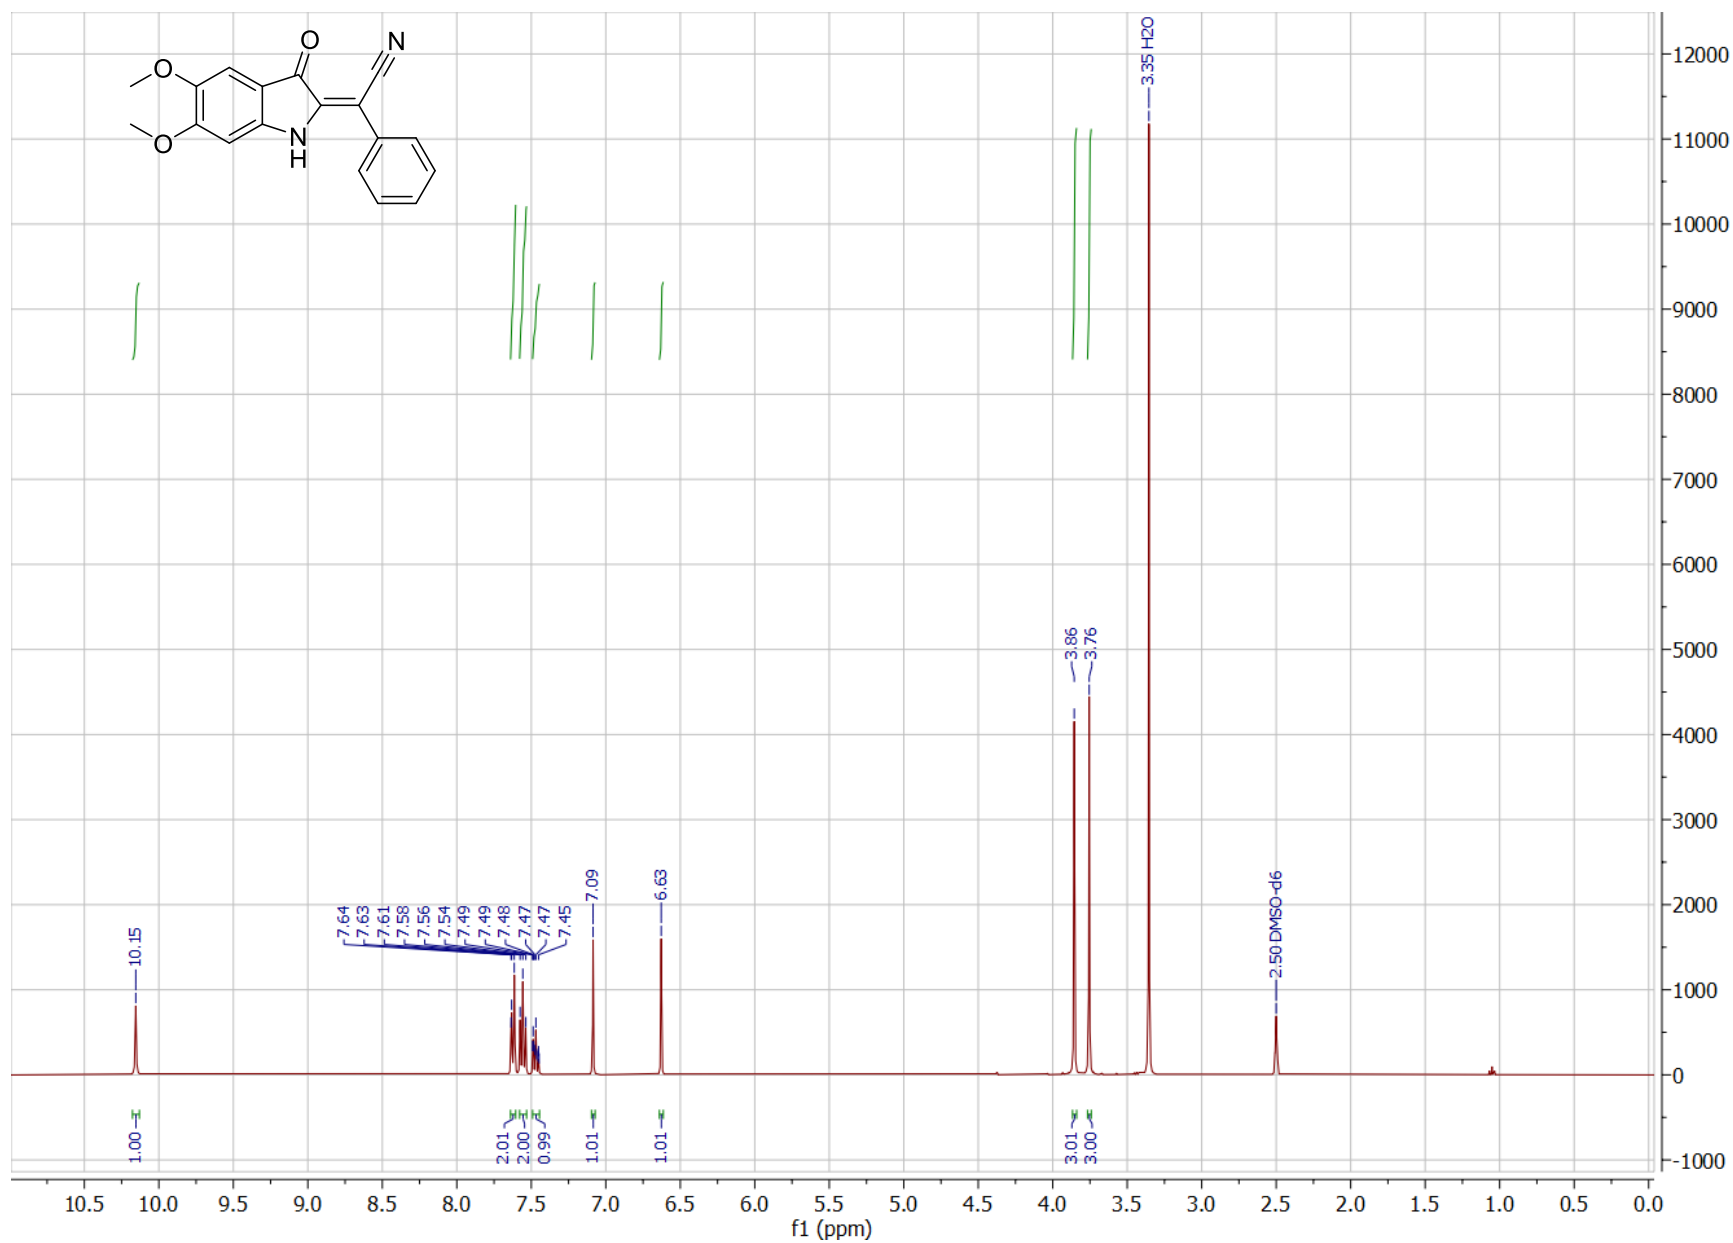

**Figure S33.** <sup>1</sup>H NMR spectrum of **2bb** in DMSO-d<sub>6</sub> (400 MHz)

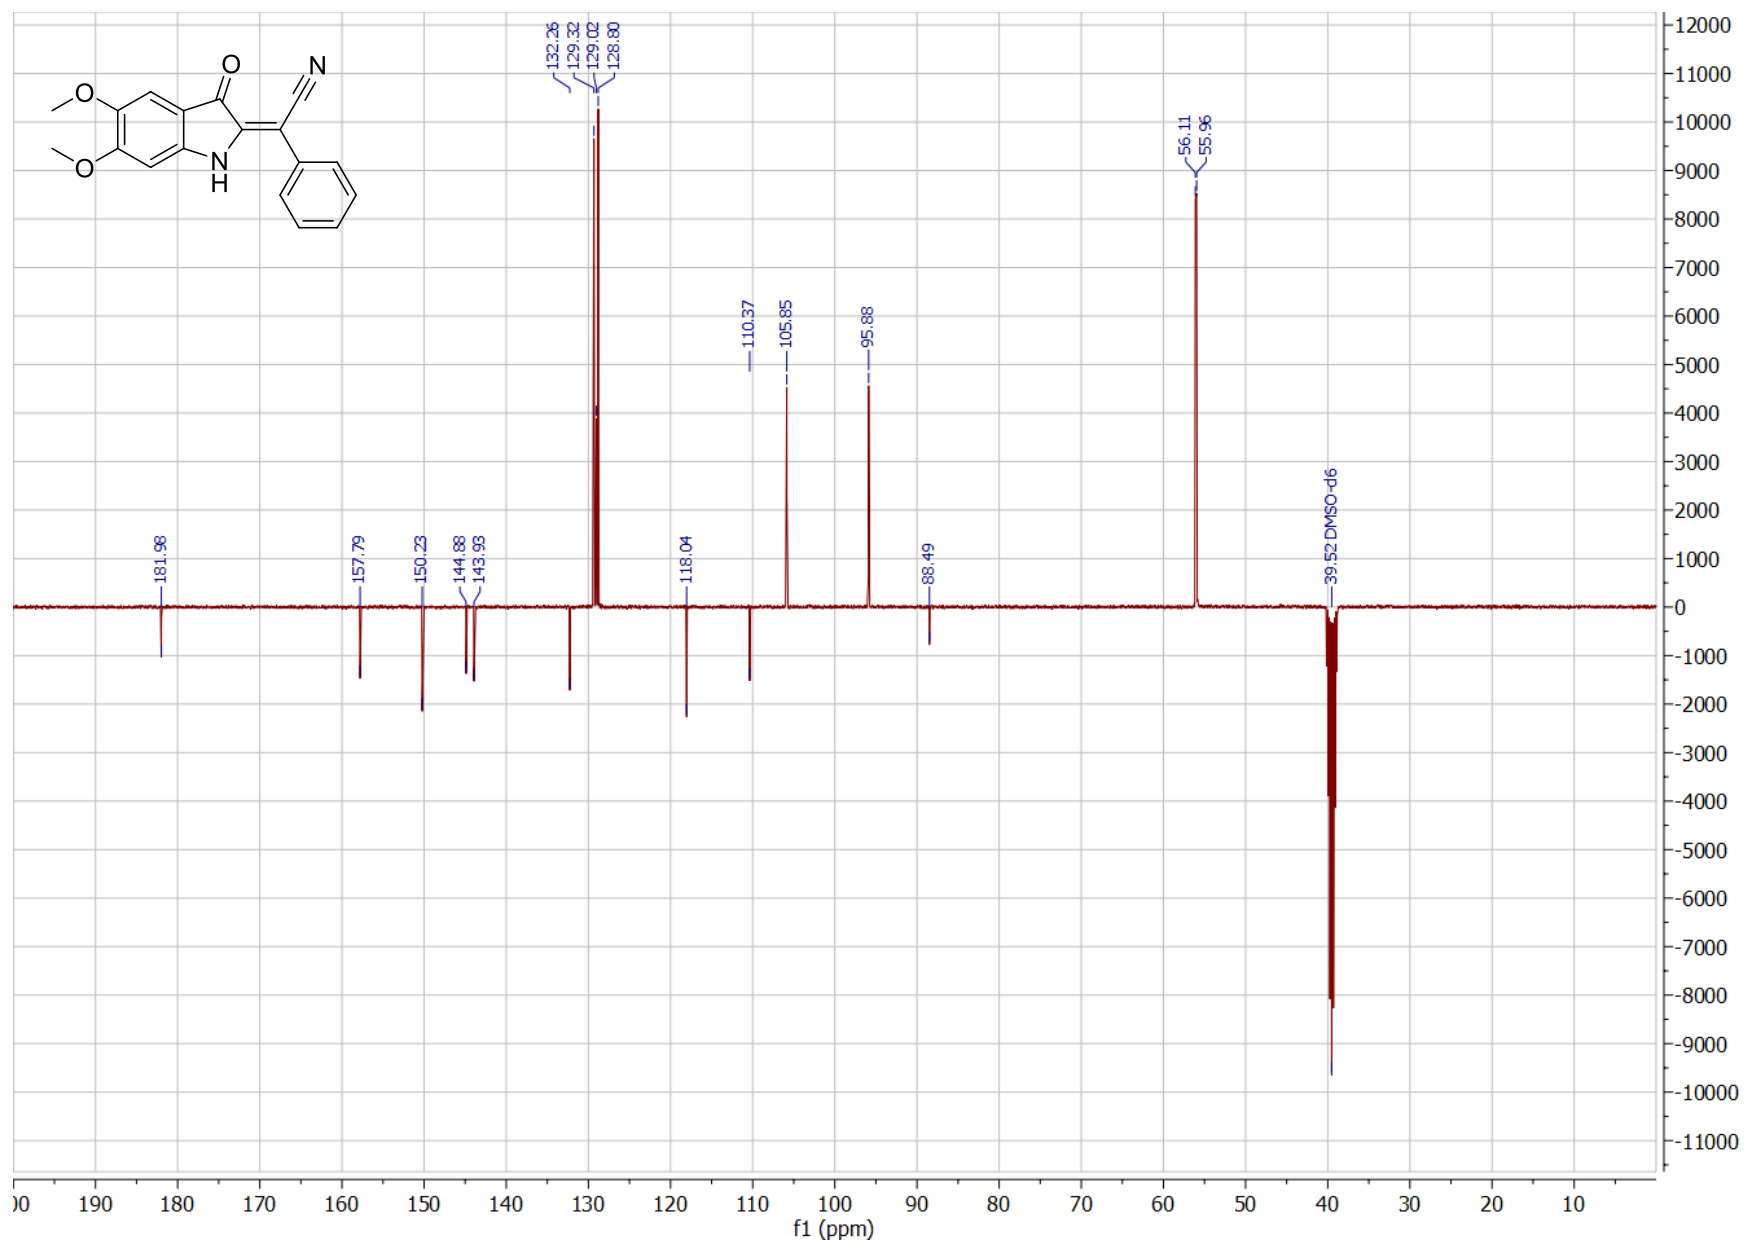

**Figure S34.** <sup>13</sup>C DEPTQ NMR spectrum of **2bb** in DMSO-*d*<sub>6</sub> (100 MHz)

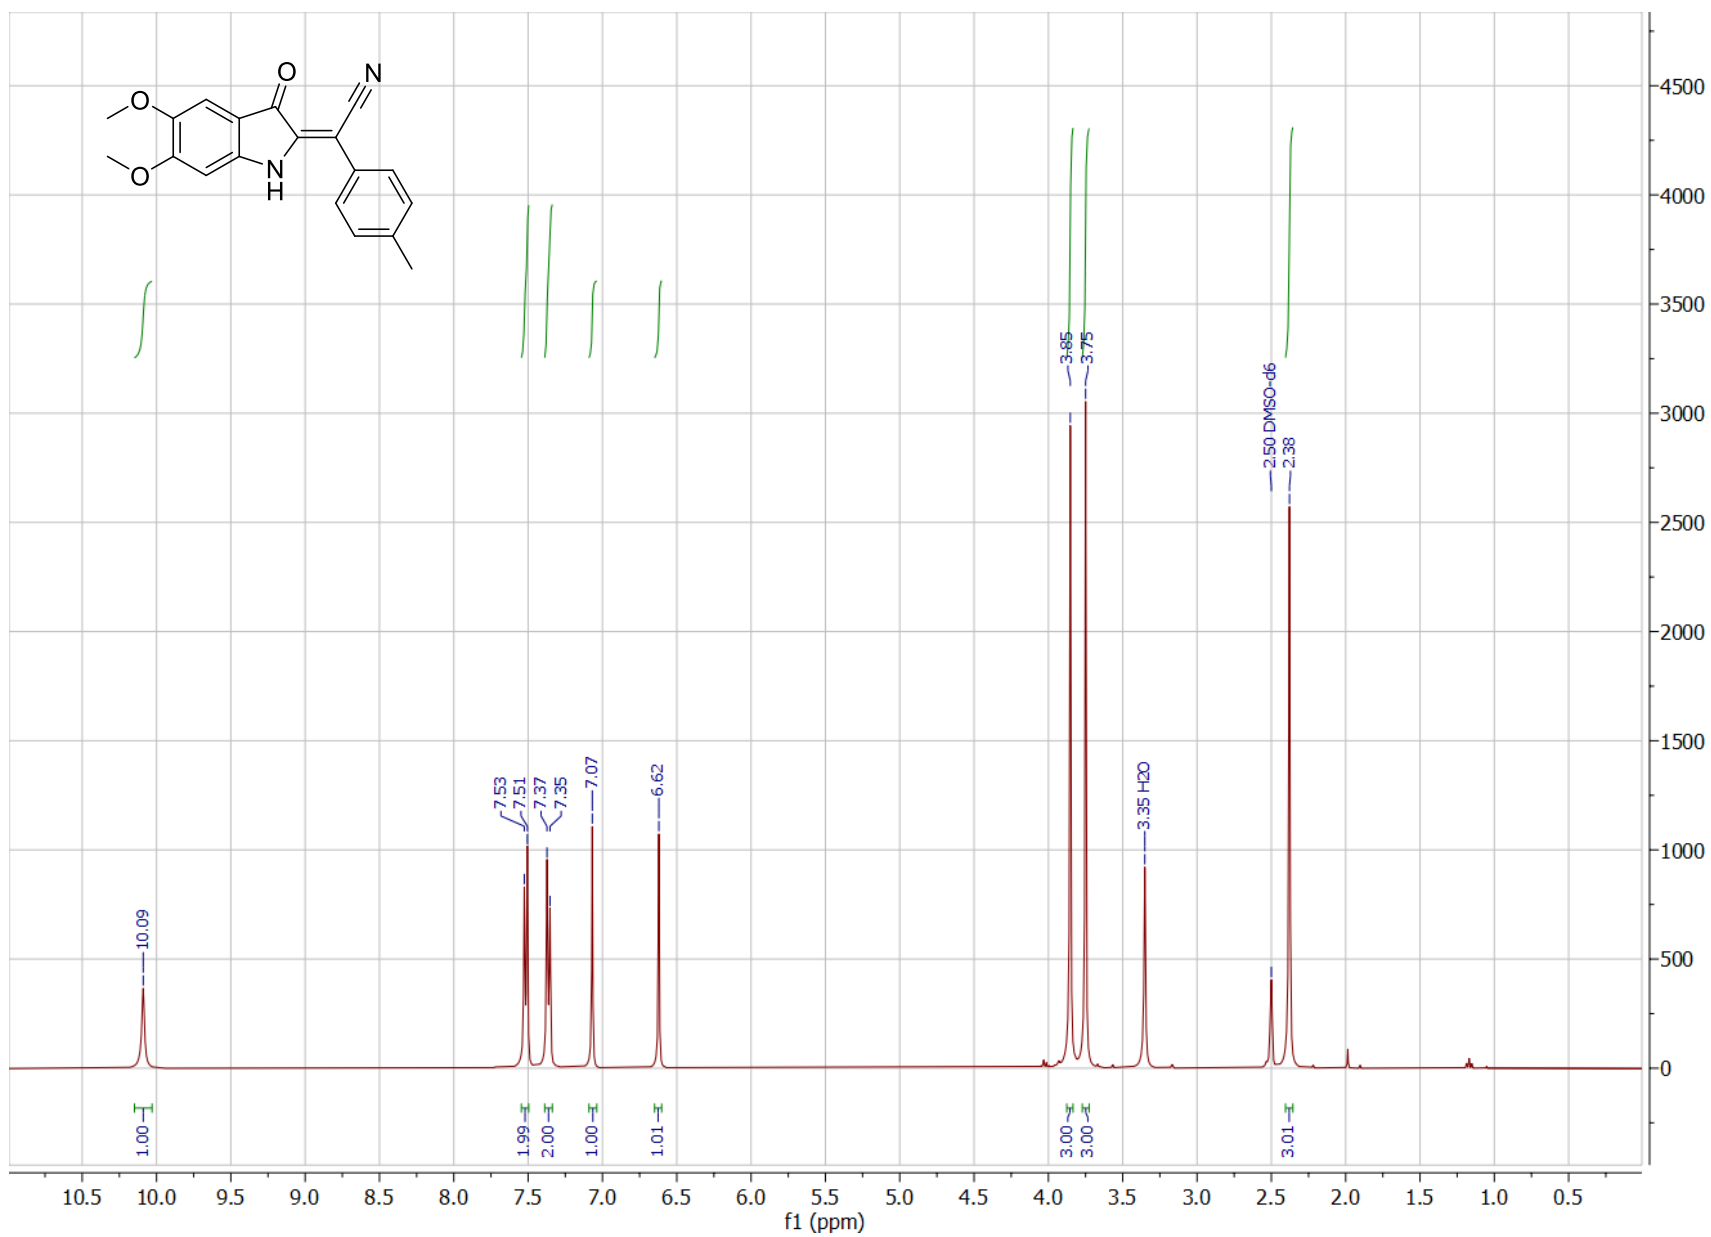

**Figure S35.** <sup>1</sup>H NMR spectrum of **2bc** in DMSO-*d*<sub>6</sub> (400 MHz)

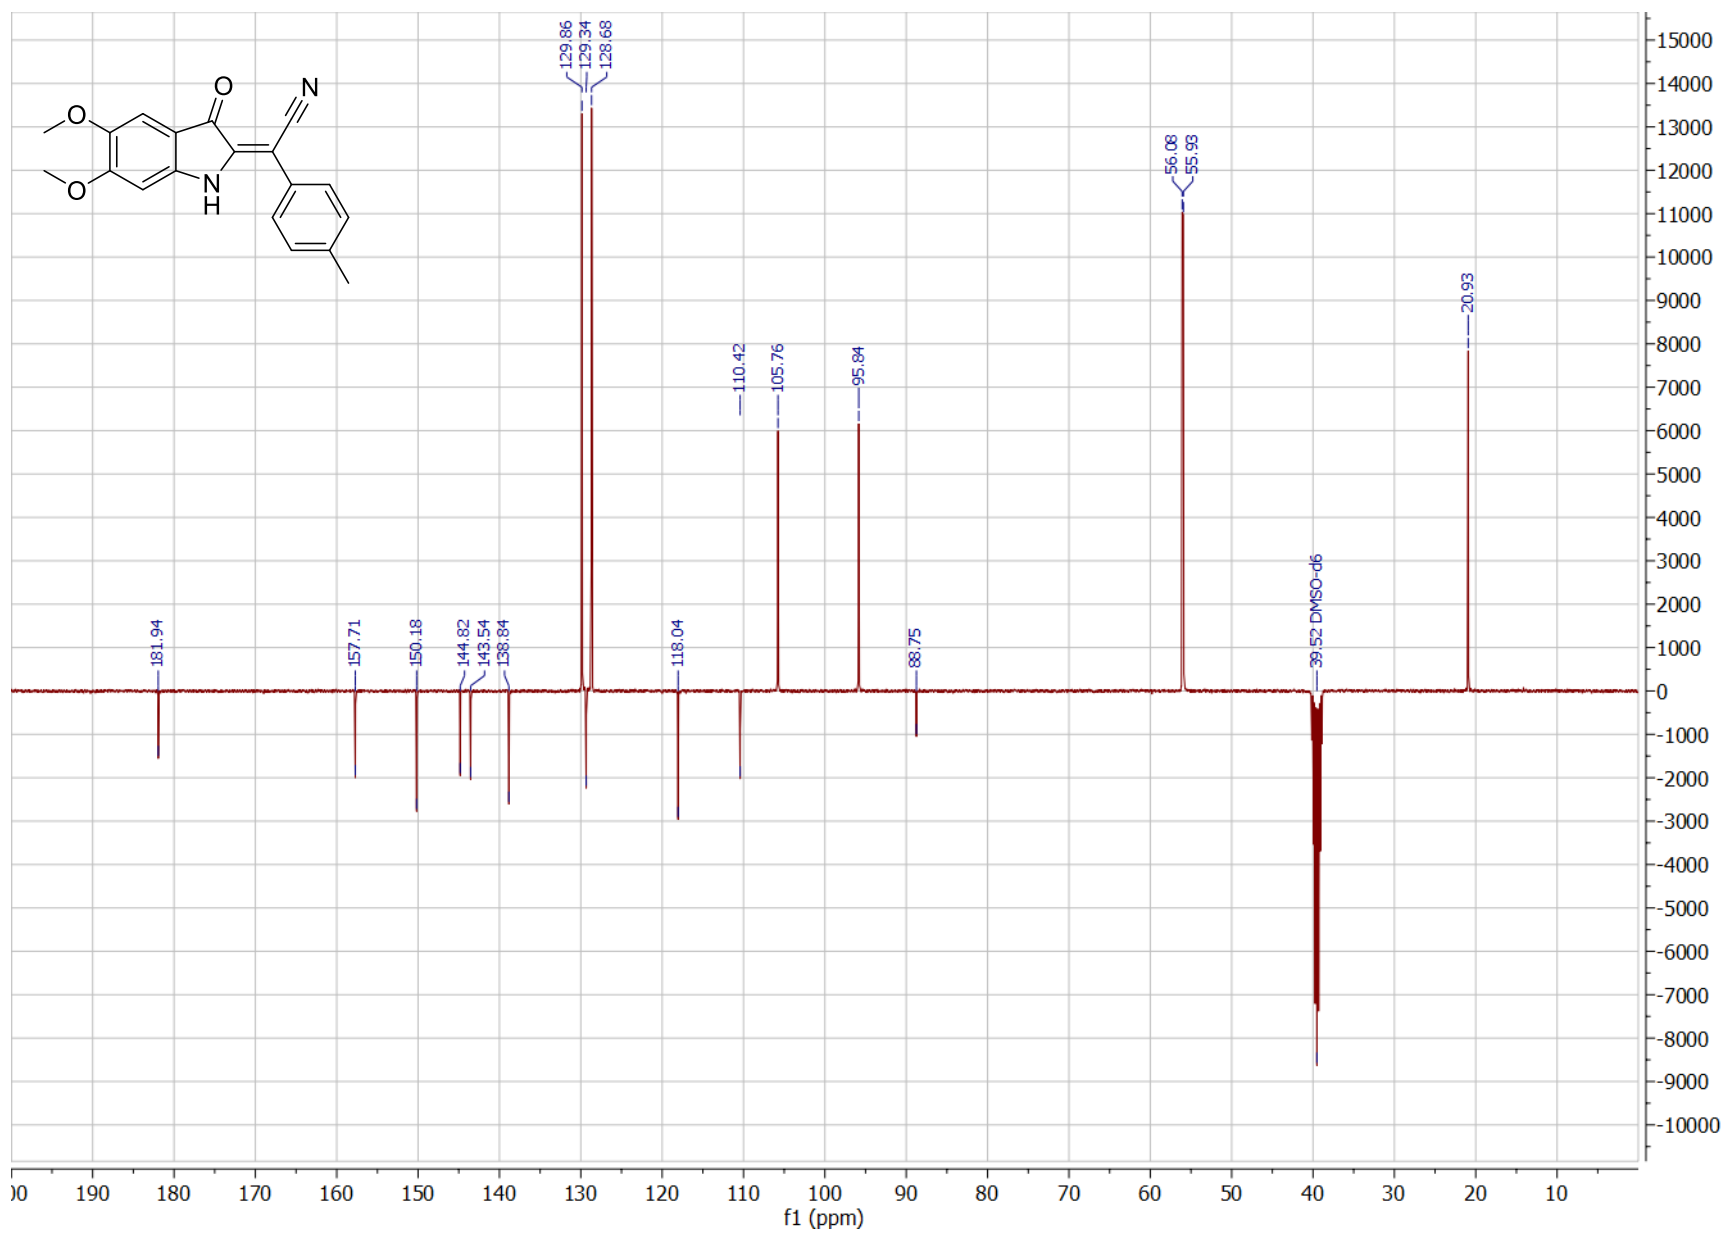

**Figure S36.**  $^{13}\text{C}$  DEPTQ NMR spectrum of **2bc** in  $\text{DMSO-}d_6$  (100 MHz)

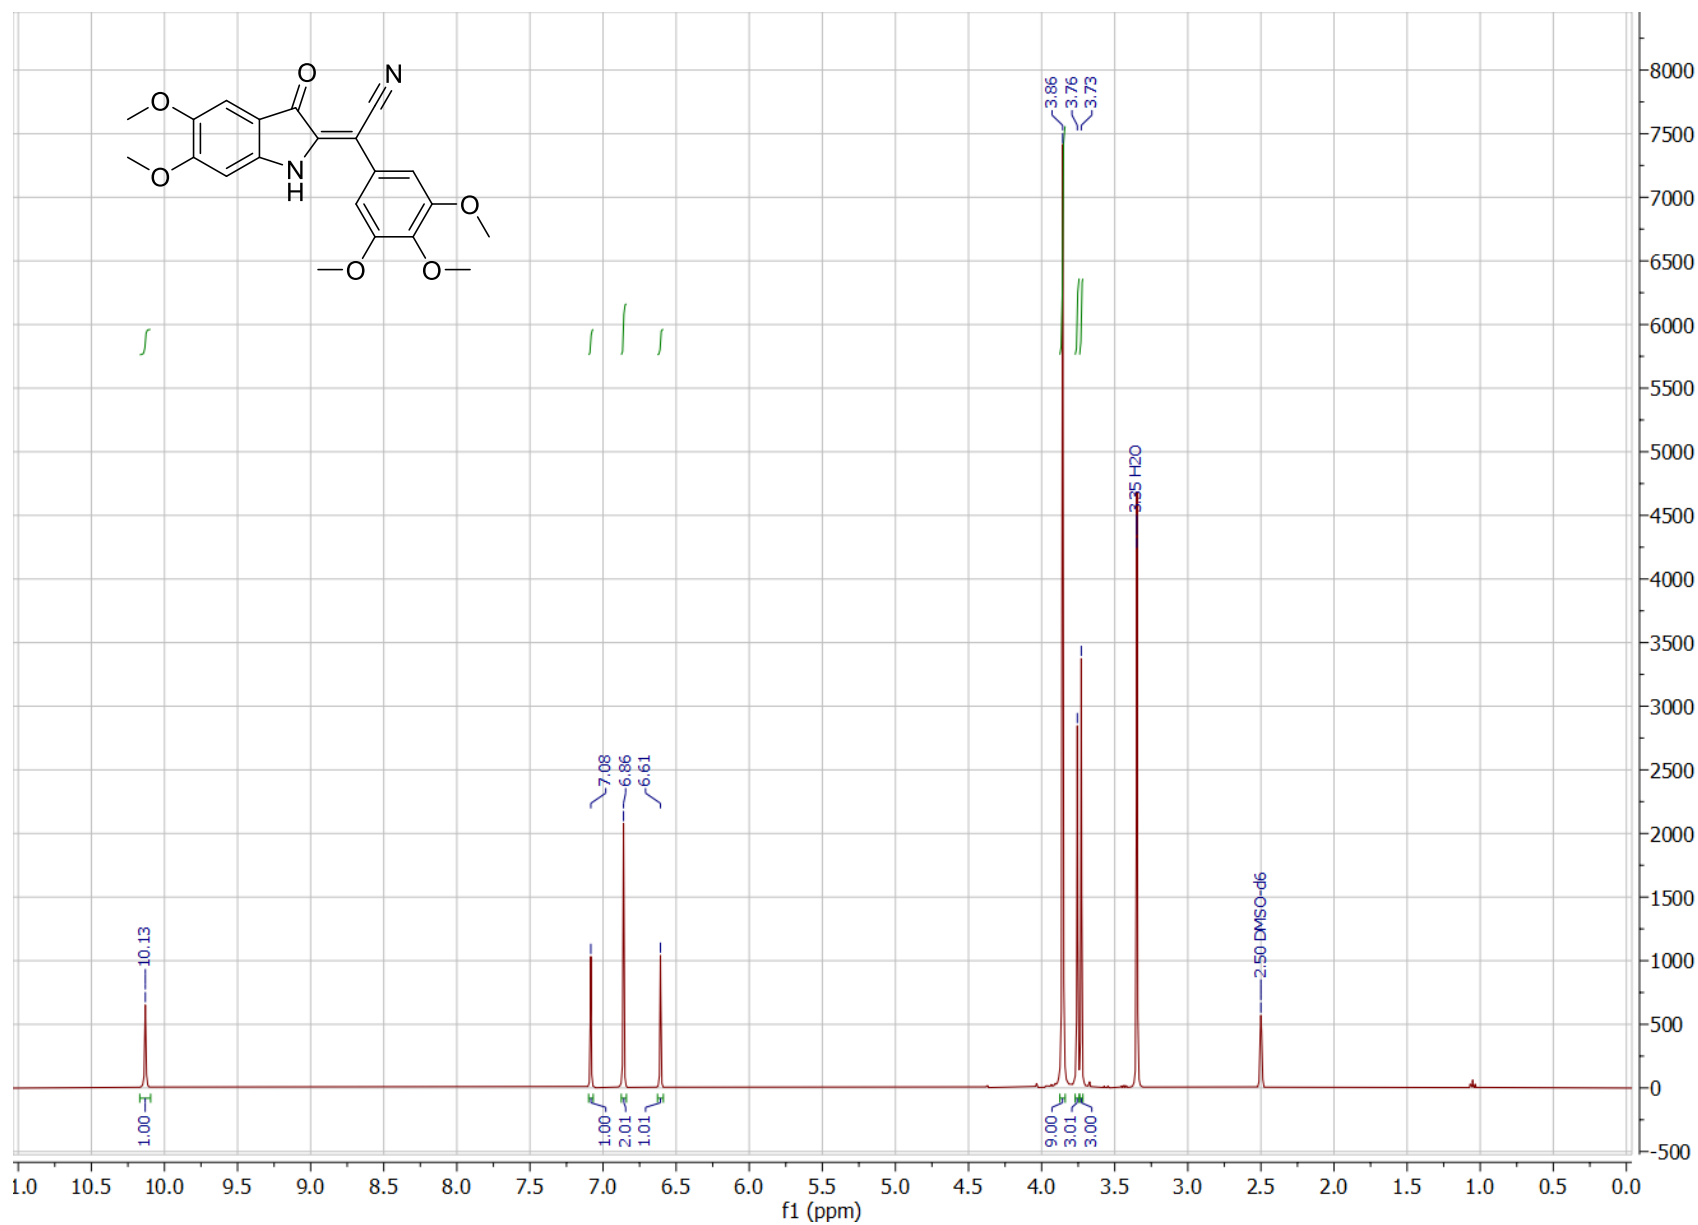

Figure S37.  $^1\text{H}$  NMR spectrum of **2bm** in  $\text{DMSO-d}_6$  (400 MHz)

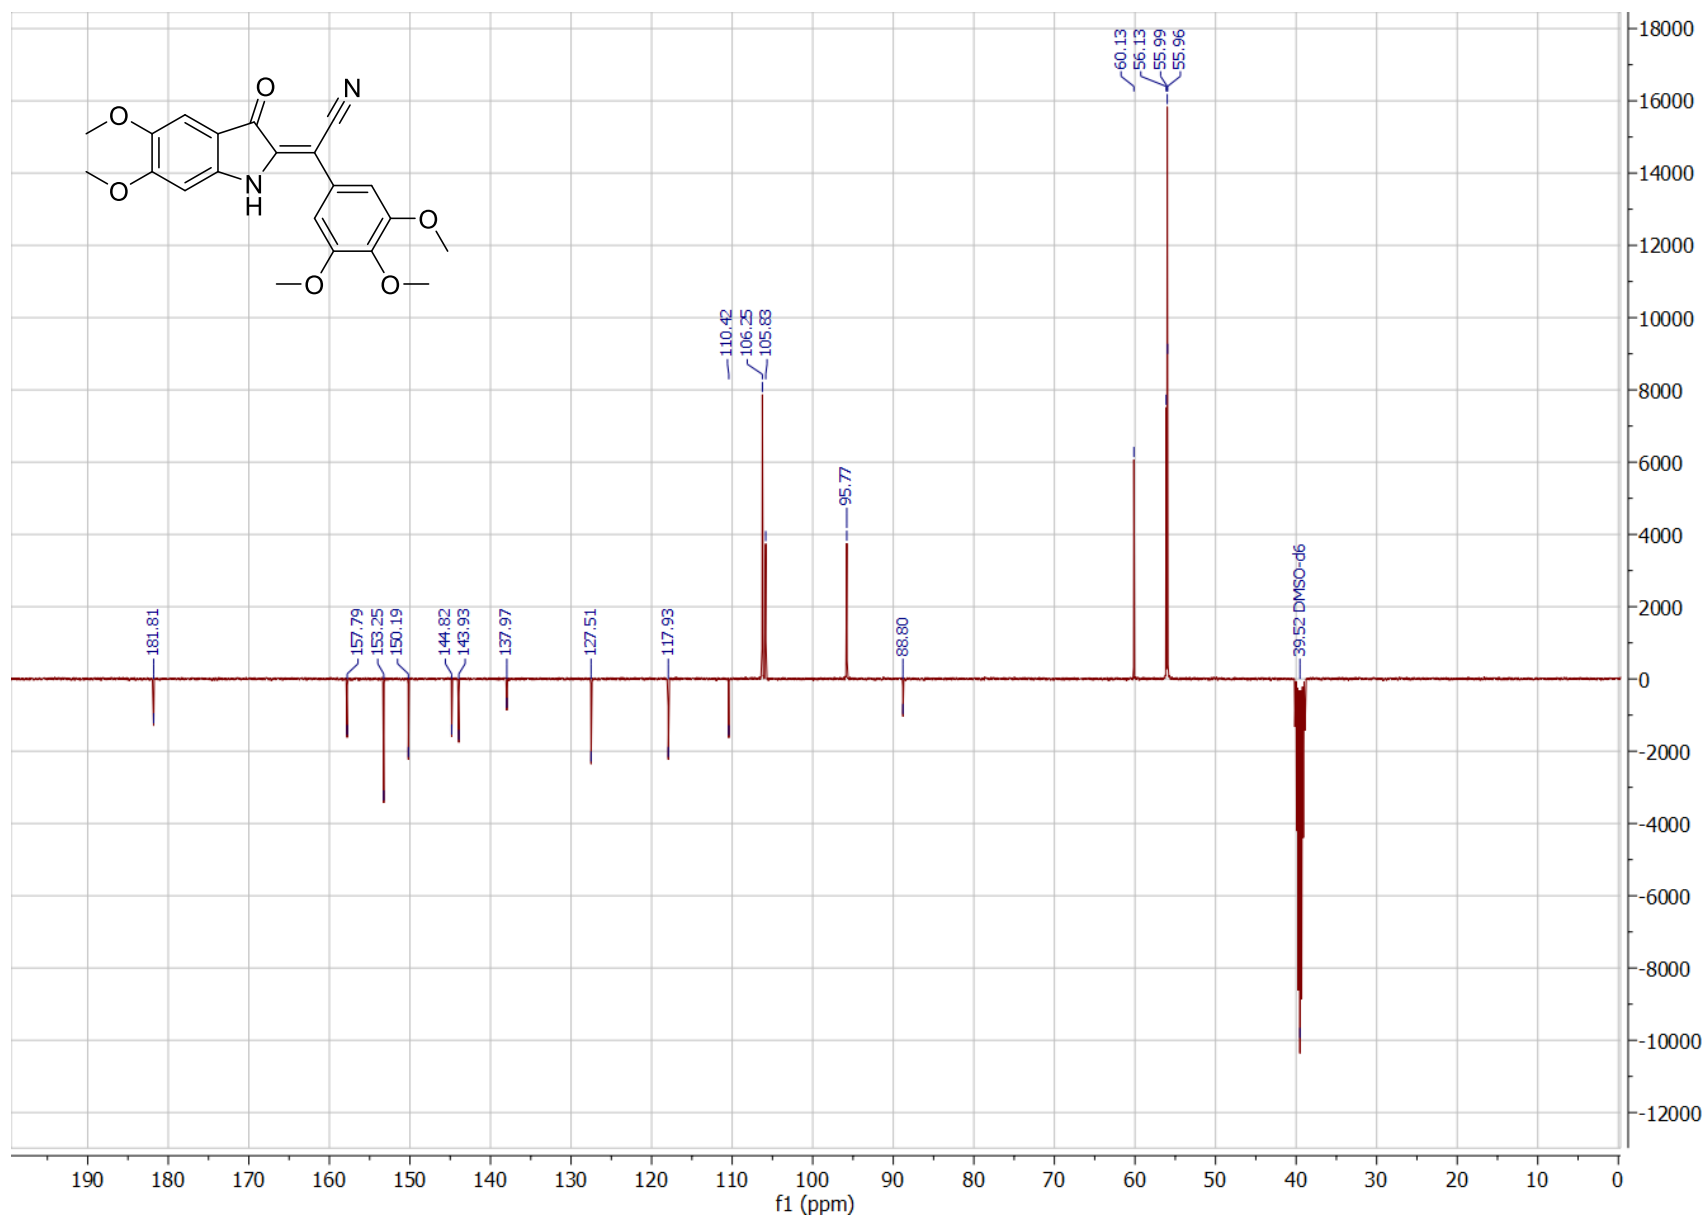

**Figure S38.**  $^{13}\text{C}$  DEPTQ NMR spectrum of **2bm** in  $\text{DMSO}-d_6$  (100 MHz)

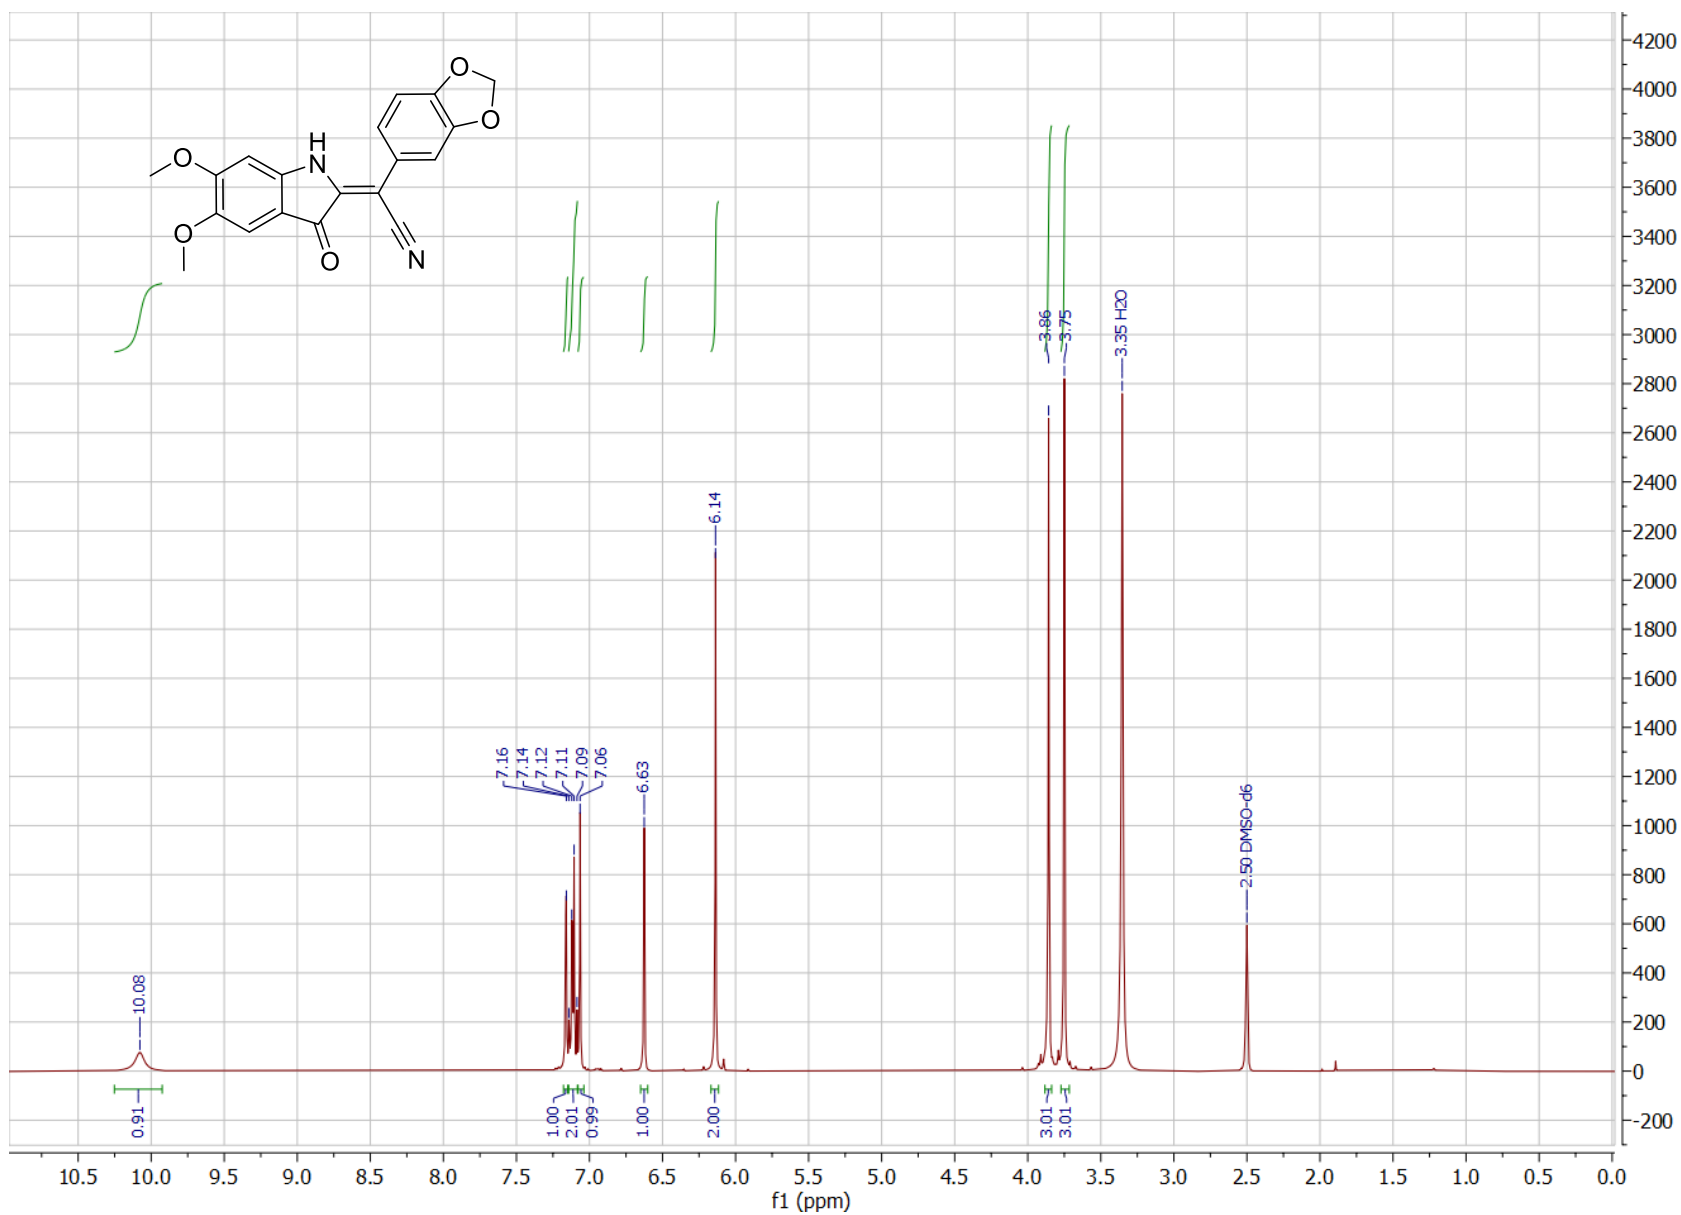

Figure S39.  $^1\text{H}$  NMR spectrum of **2bn** in  $\text{DMSO-d}_6$  (400 MHz)

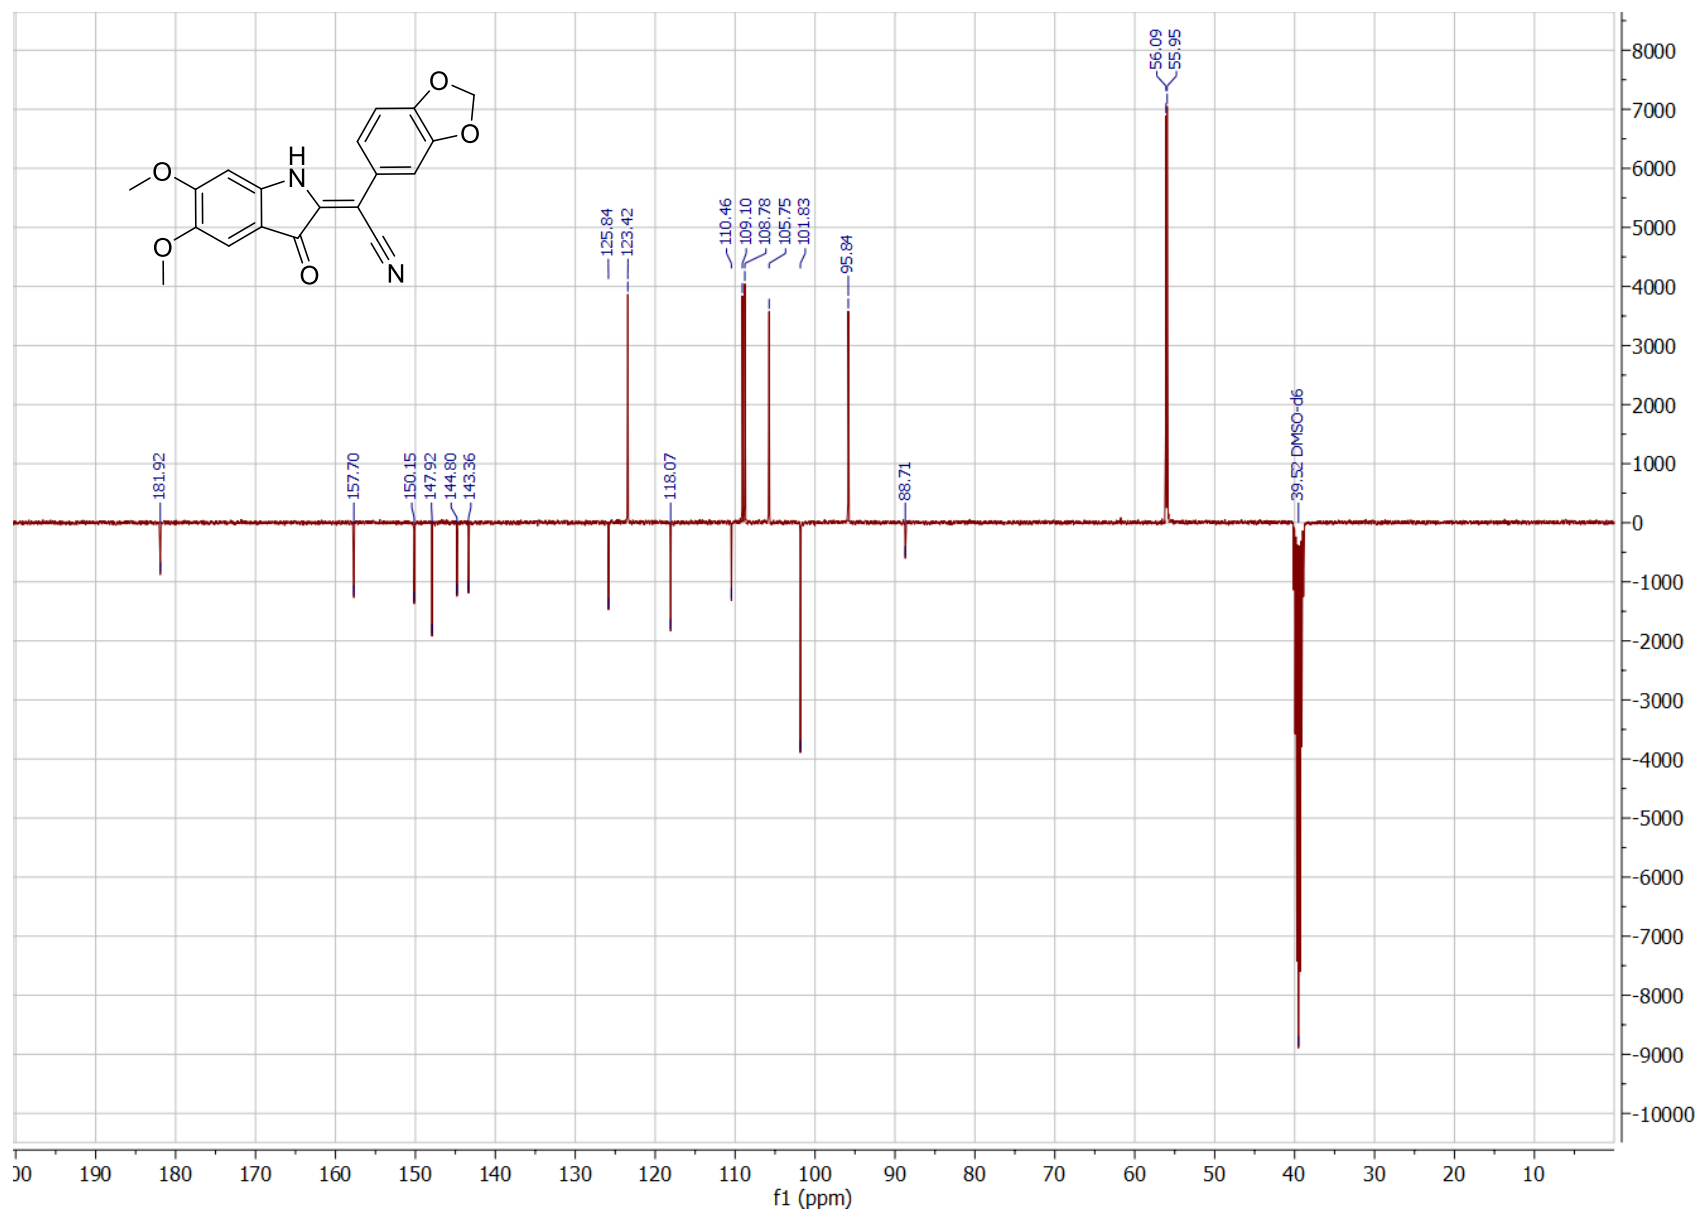

**Figure S40.**  $^{13}\text{C}$  DEPTQ NMR spectrum of **2bn** in DMSO- $d_6$  (100 MHz)

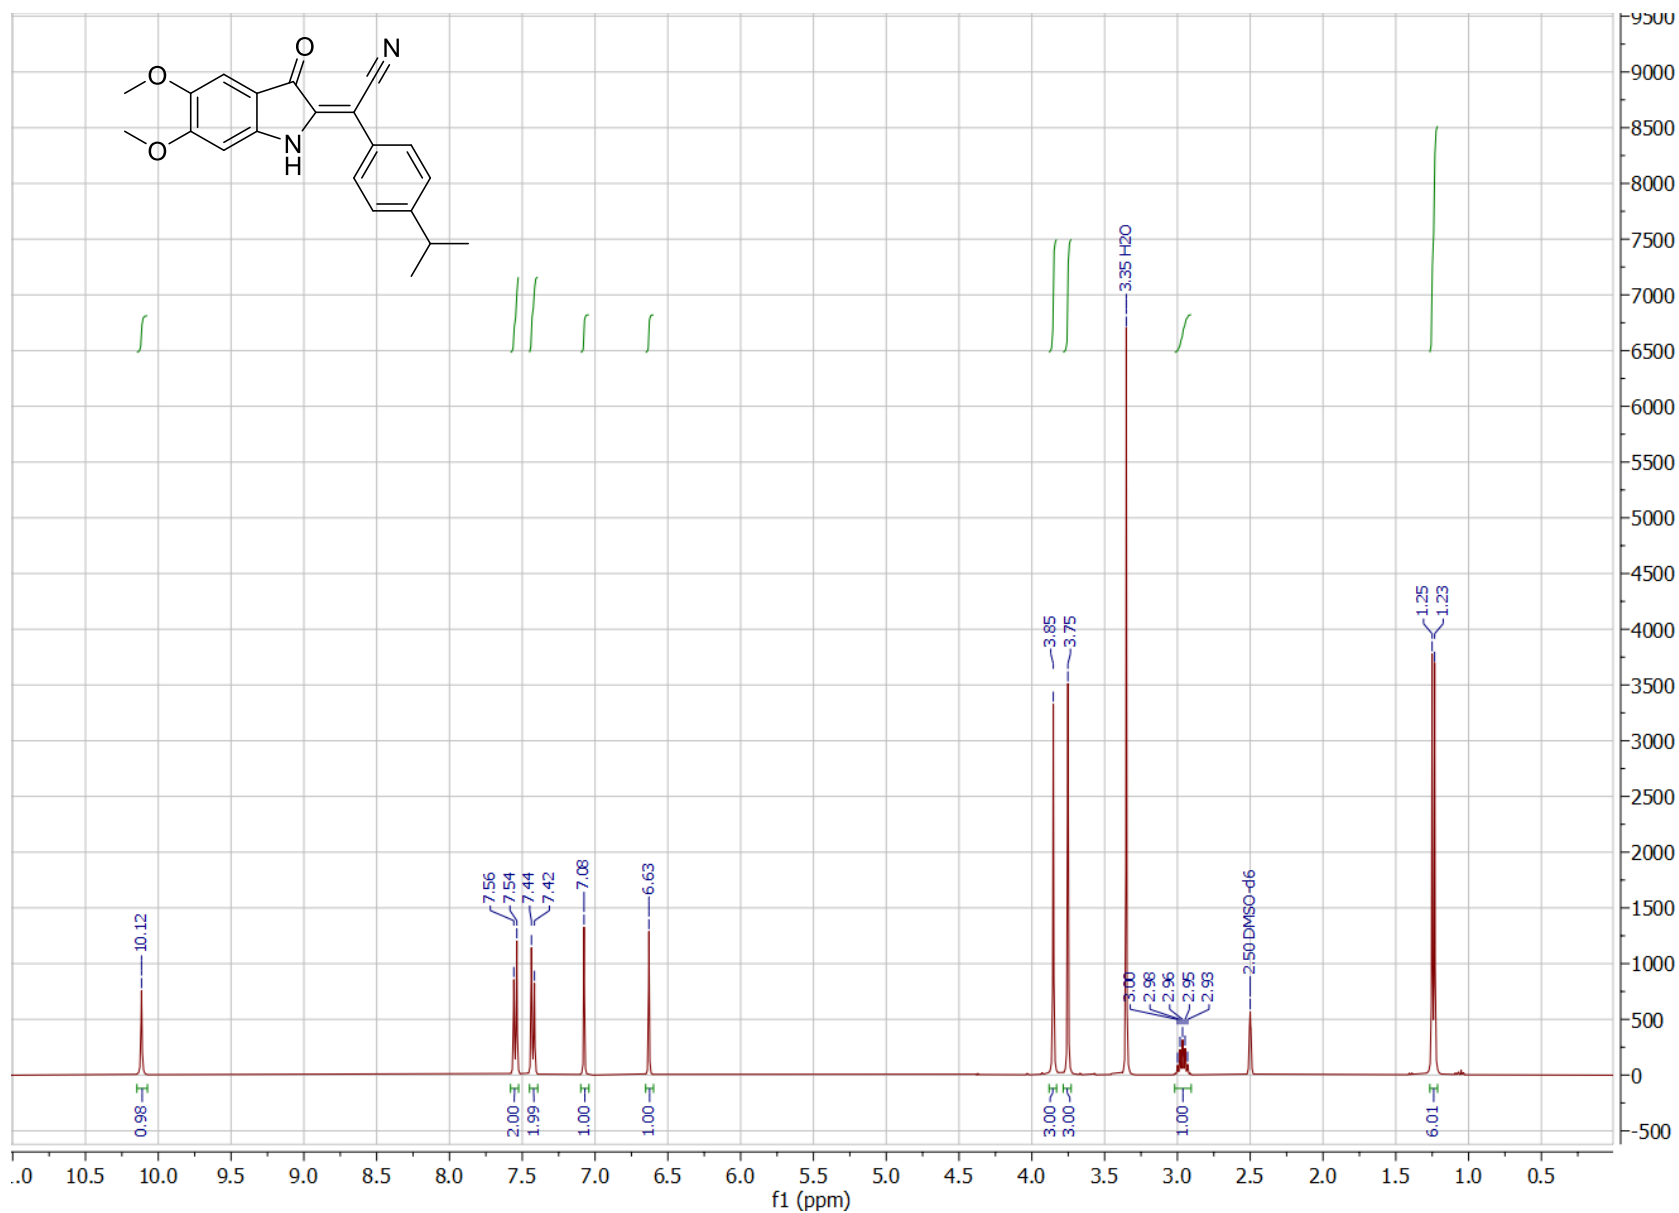

**Figure S41.** <sup>1</sup>H NMR spectrum of **2be** in DMSO-*d*<sub>6</sub> (400 MHz)

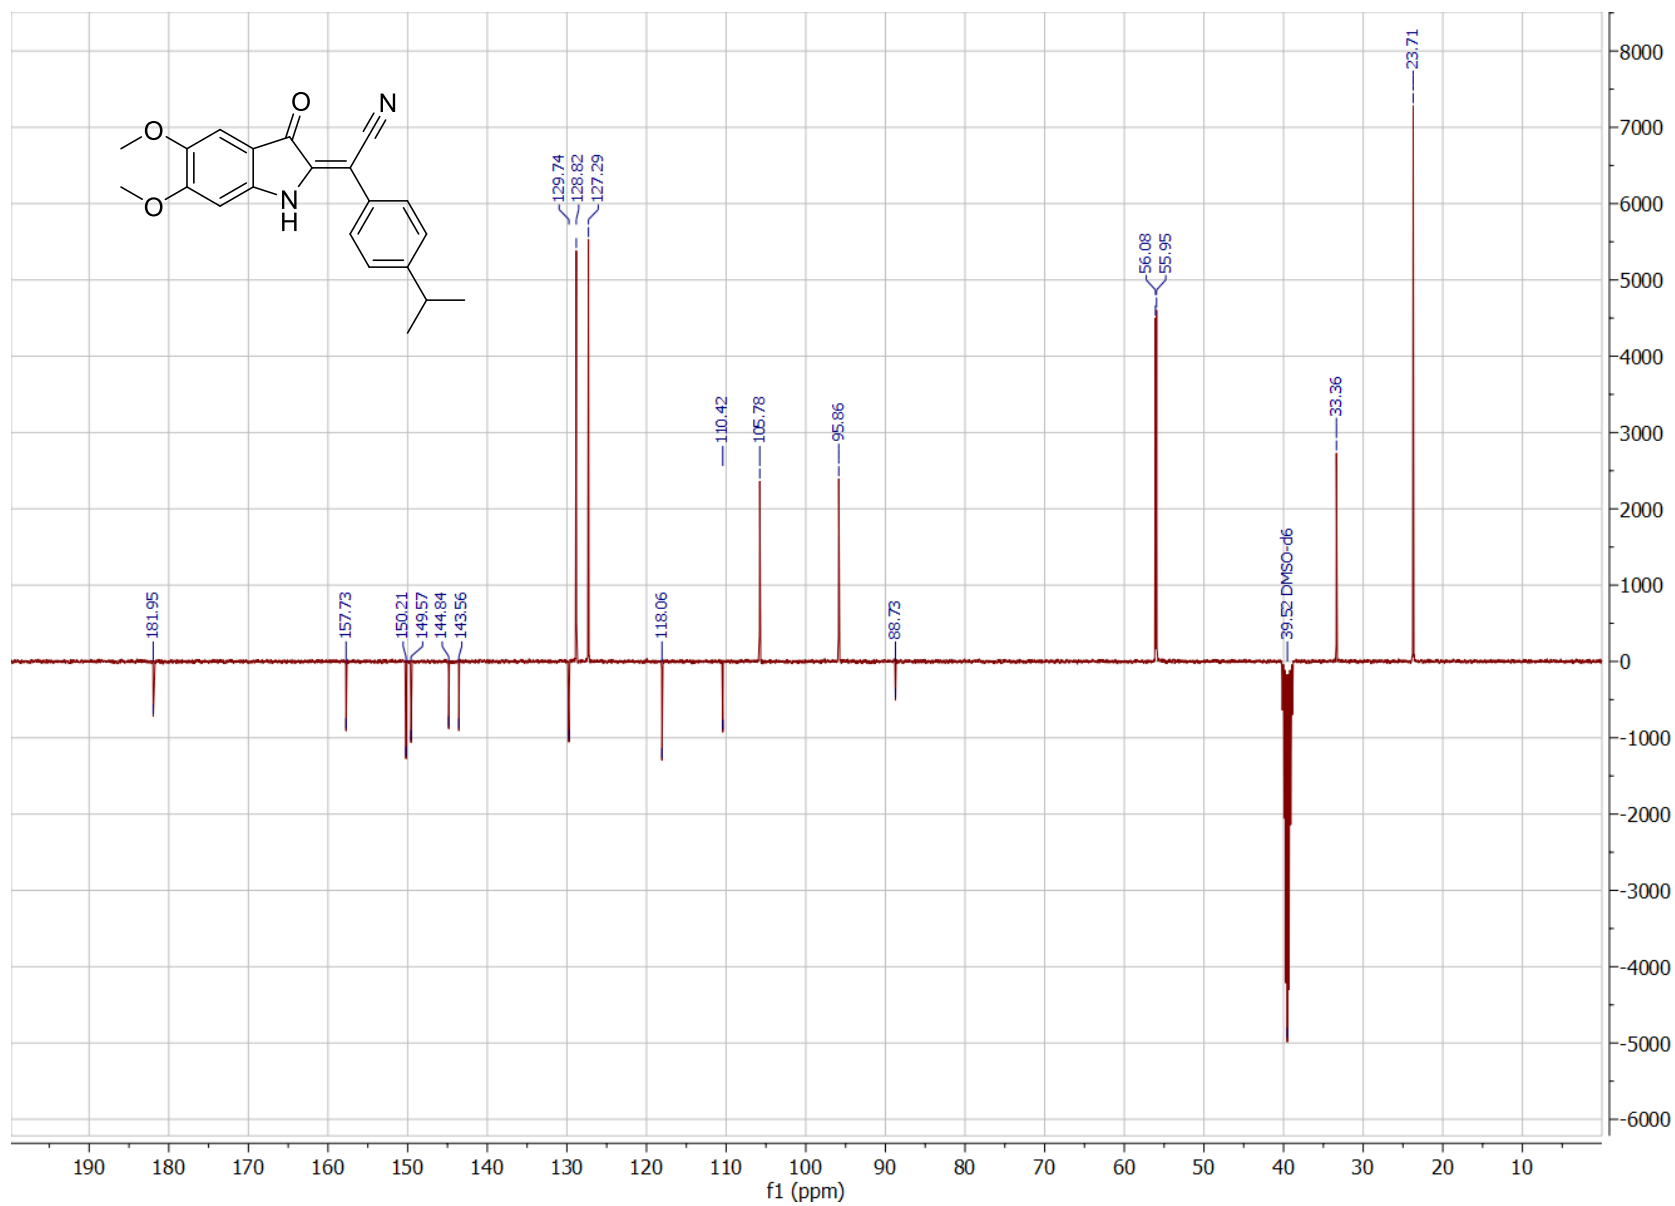

**Figure S42.** <sup>13</sup>C DEPTQ NMR spectrum of **2be** in DMSO-*d*<sub>6</sub> (100 MHz)

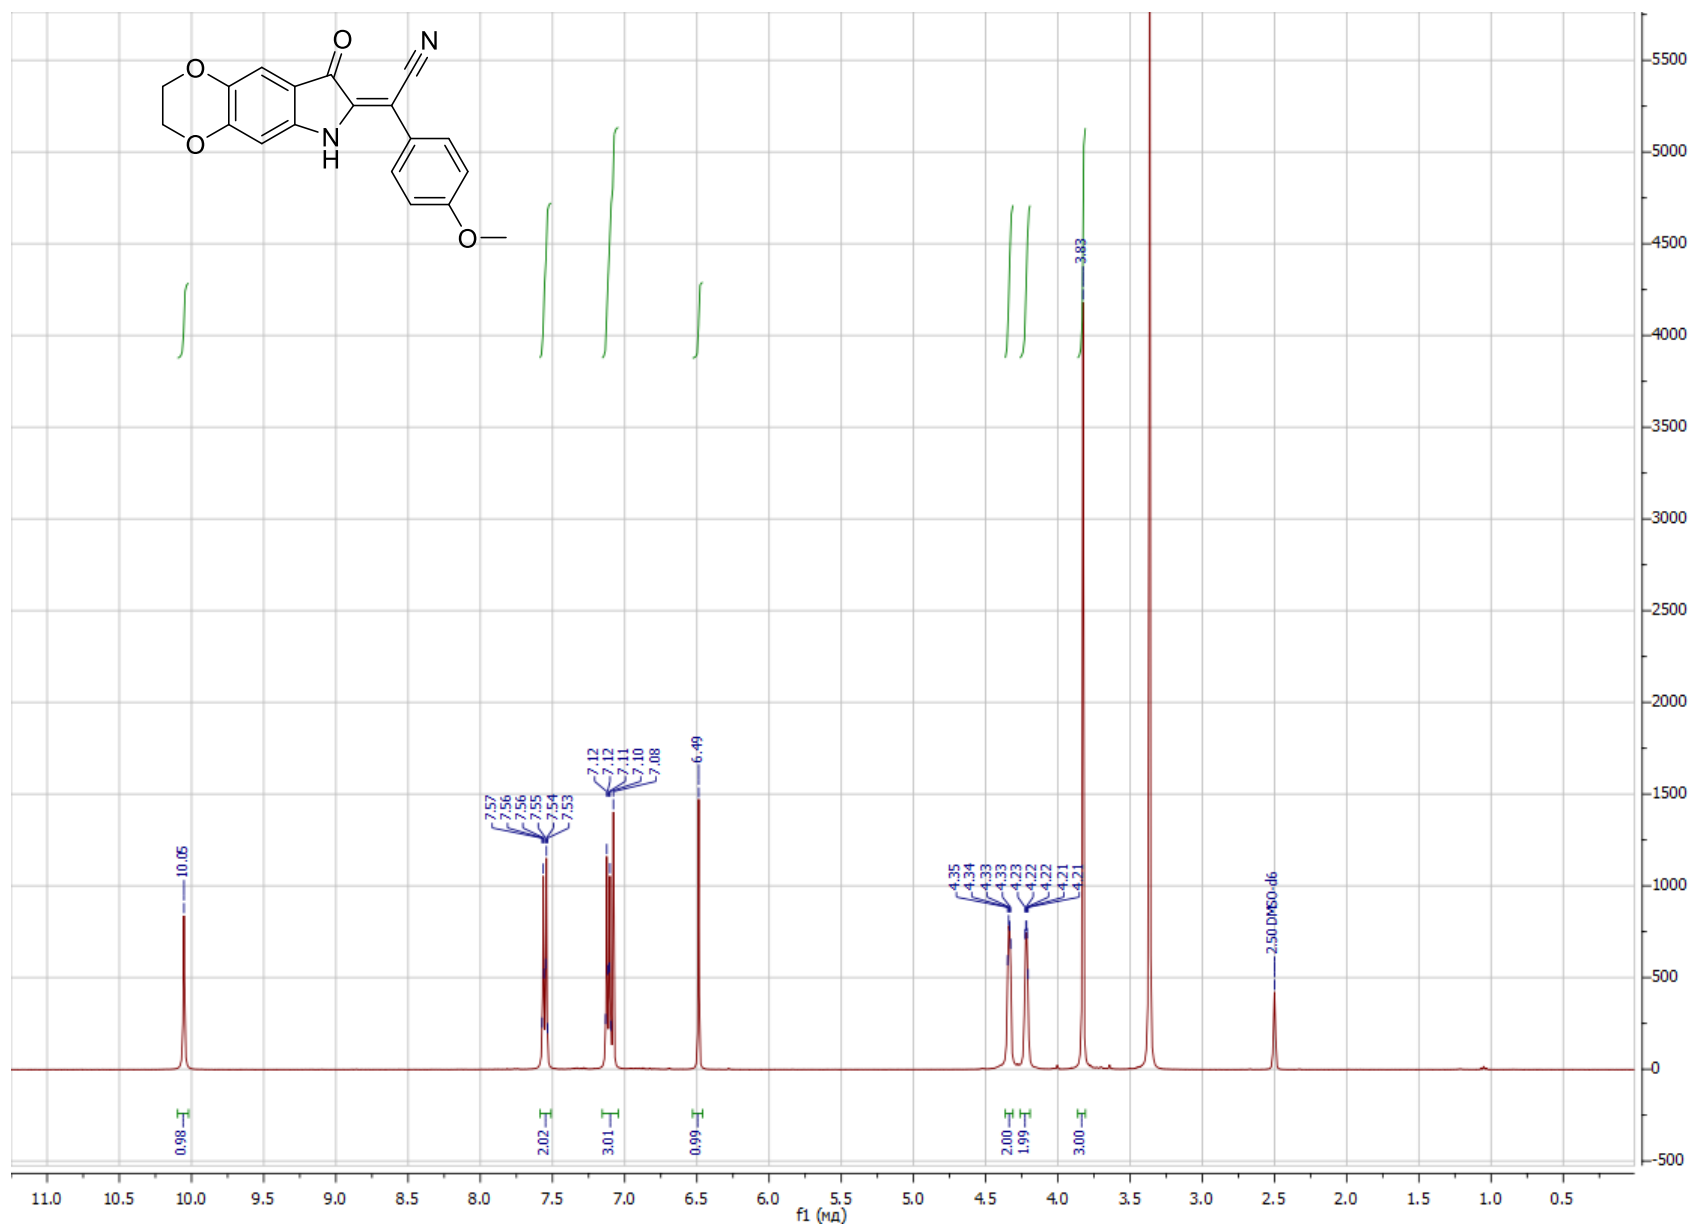

Figure S43. <sup>1</sup>H NMR spectrum of **2ca** in DMSO-*d*<sub>6</sub> (400 MHz)

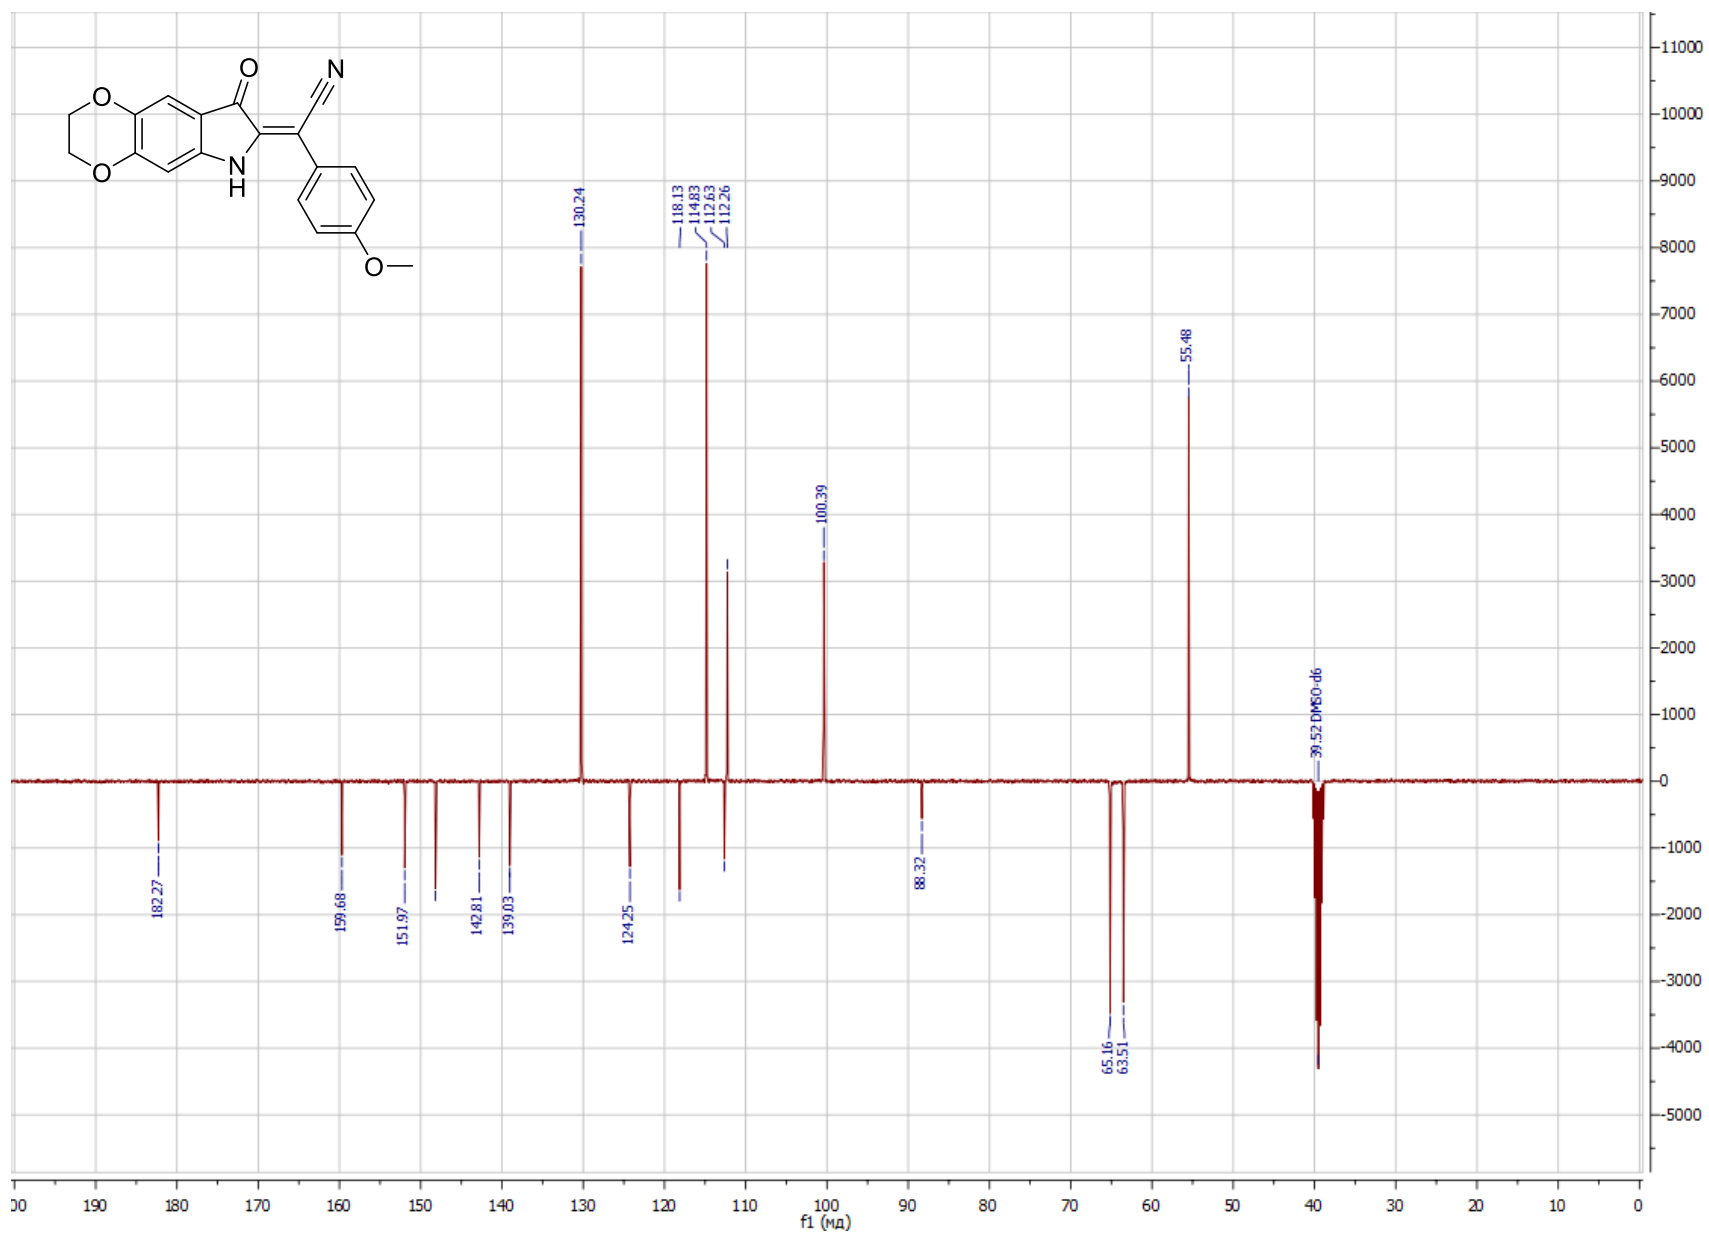

**Figure S44.**  $^{13}\text{C}$  DEPTQ NMR spectrum of **2ca** in  $\text{DMSO}-d_6$  (100 MHz)

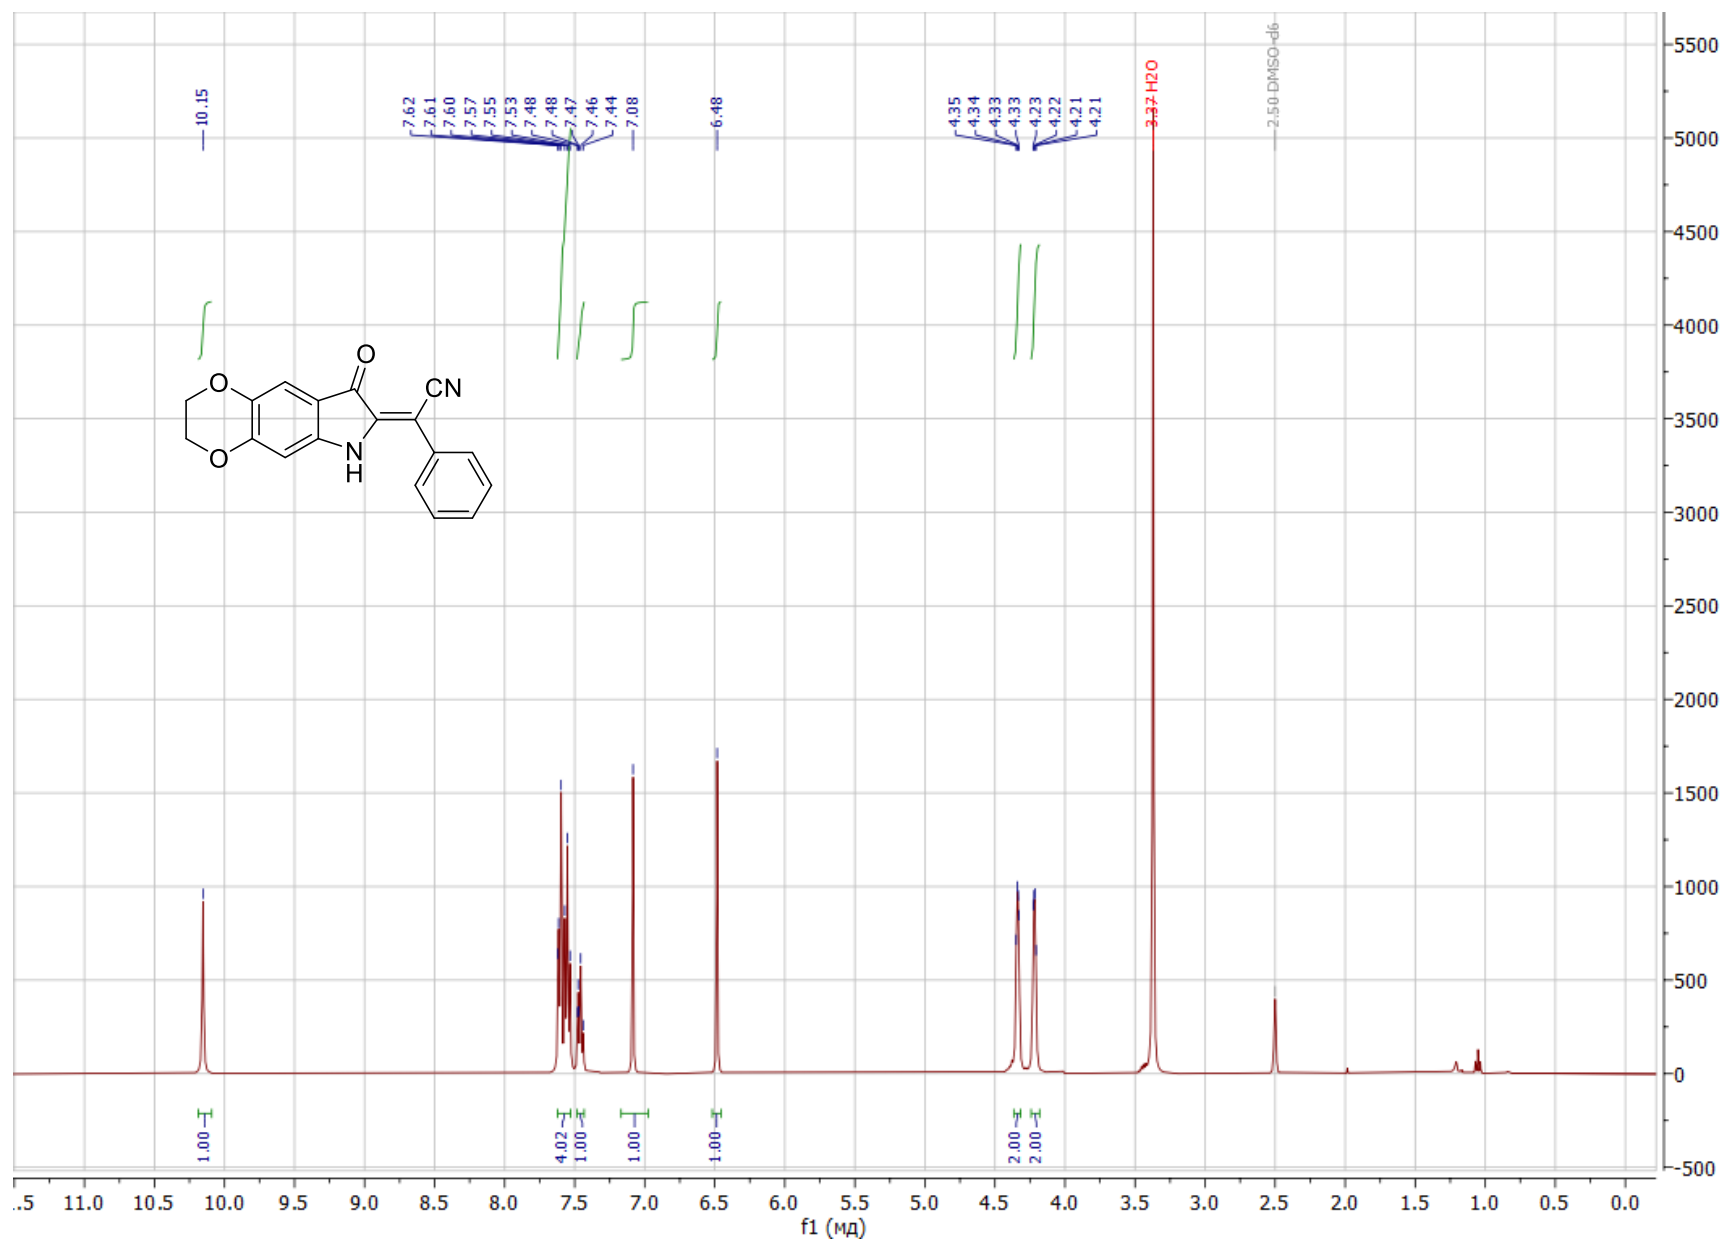

Figure S45.  $^1\text{H}$  NMR spectrum of **2cb** in  $\text{DMSO}-d_6$  (400 MHz)

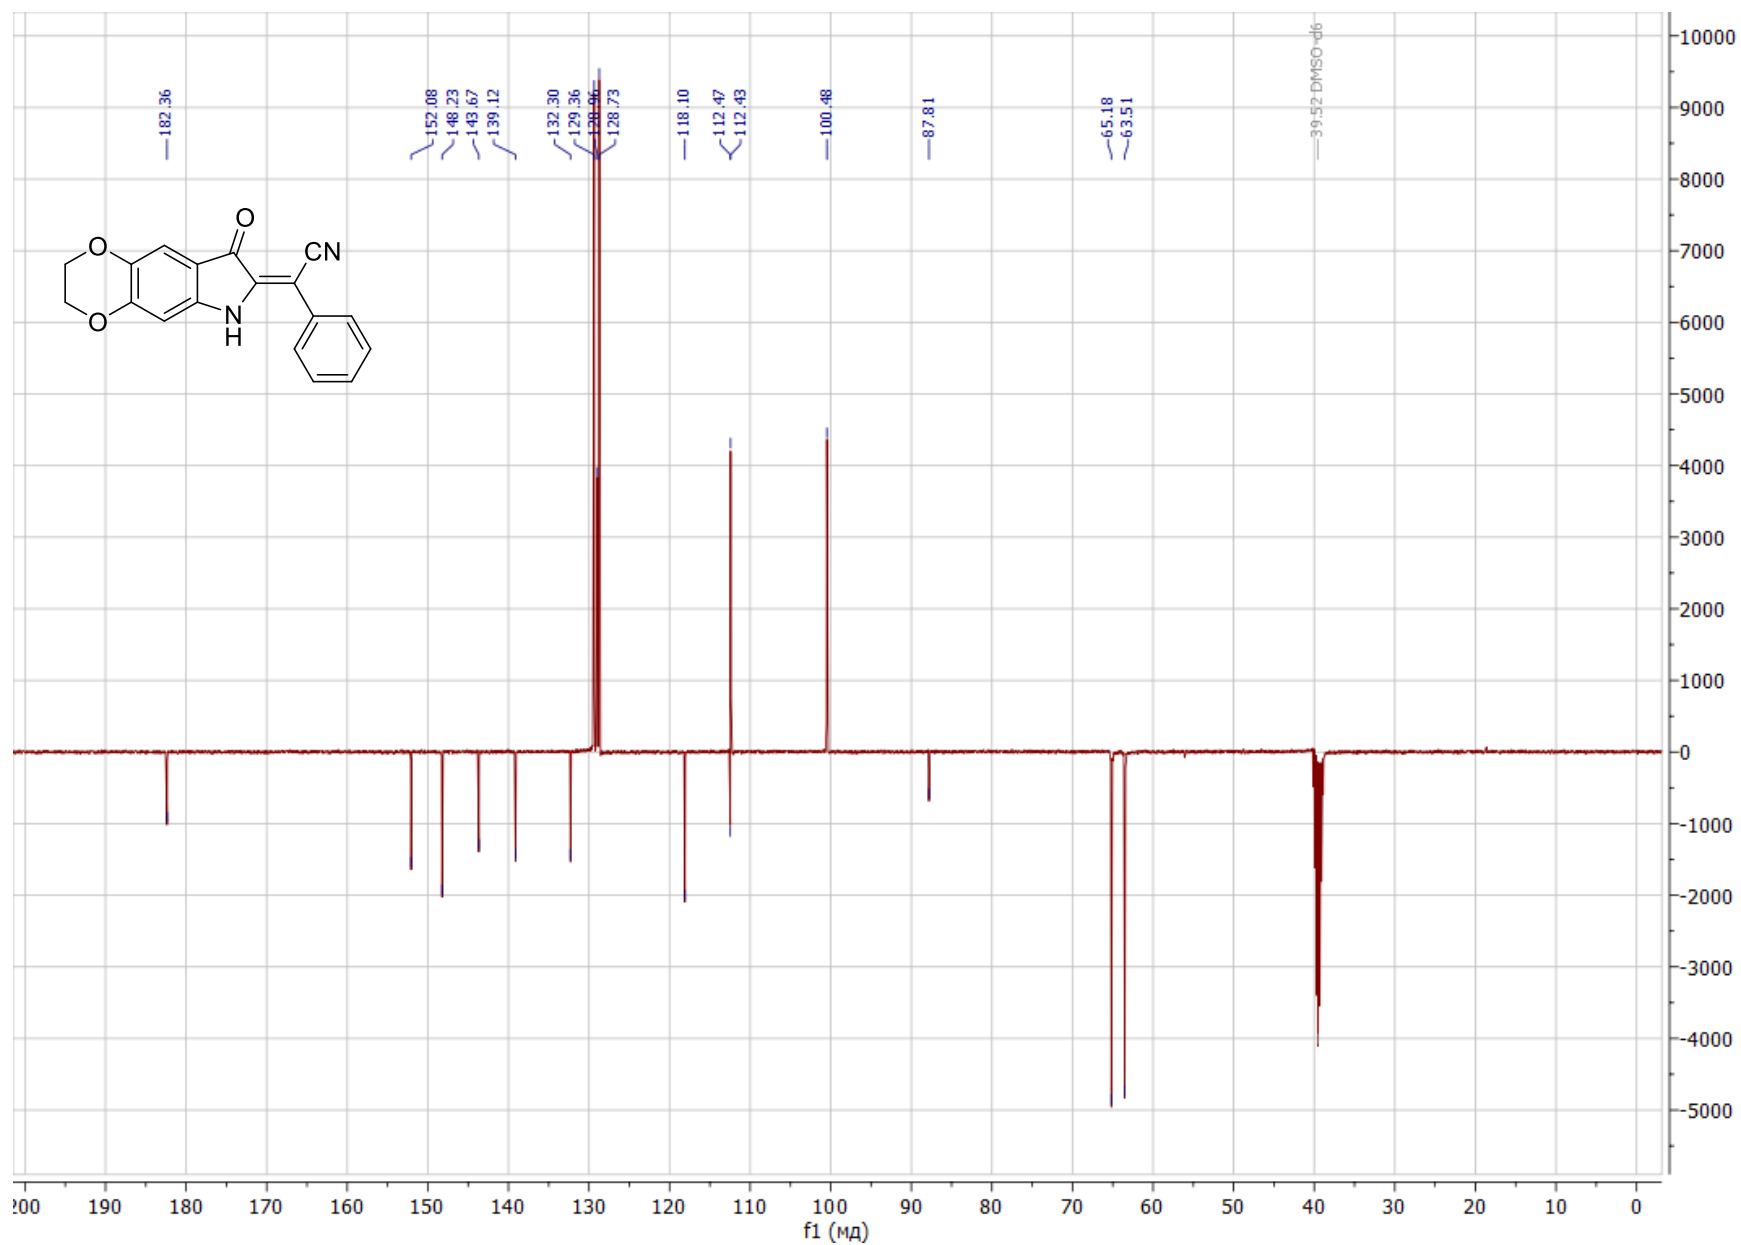

**Figure S46.**  $^{13}\text{C}$  DEPTQ NMR spectrum of **2cb** in  $\text{DMSO}-d_6$  (100 MHz)

$^1\text{H}$  and  $^{13}\text{C}$  NMR spectral charts for (*E*)-2-(1-hydroxy-3-oxoindolin-2-ylidene)-2-phenylacetonitrile (**10ab**):

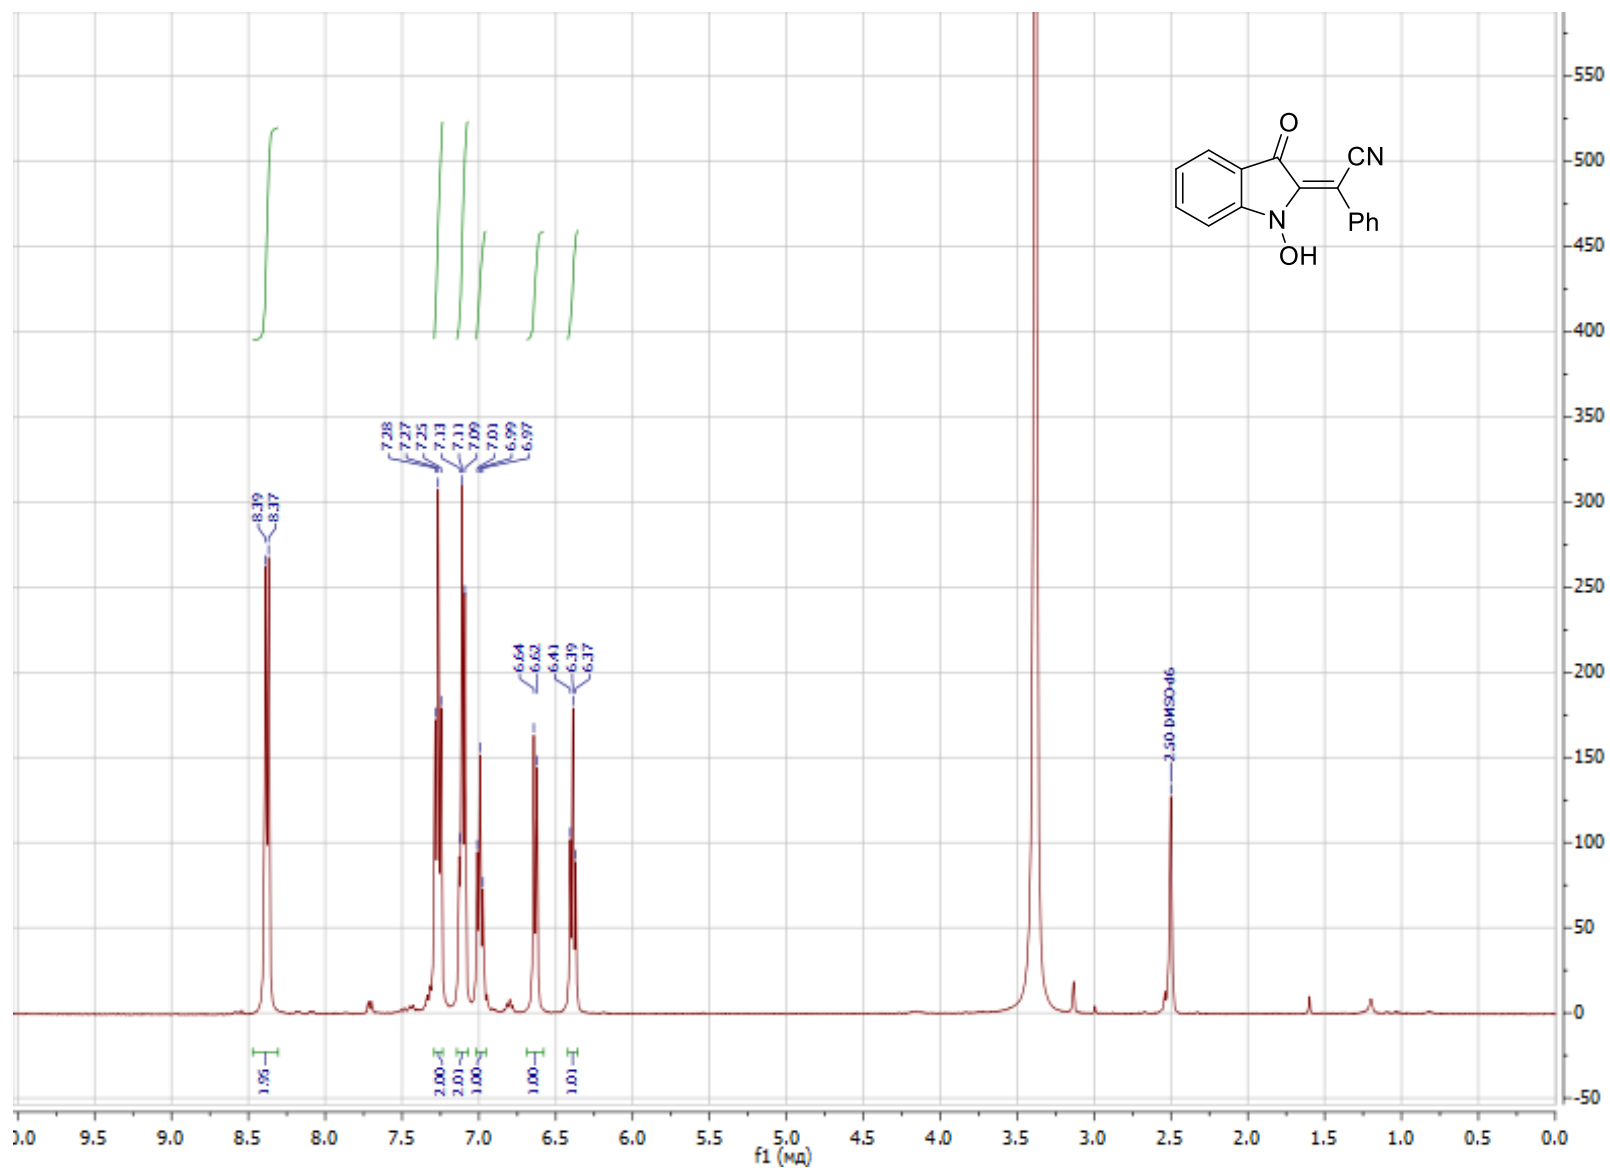

Figure S47.  $^1\text{H}$  NMR spectrum of **10ab** in  $\text{DMSO-}d_6$  (400 MHz)

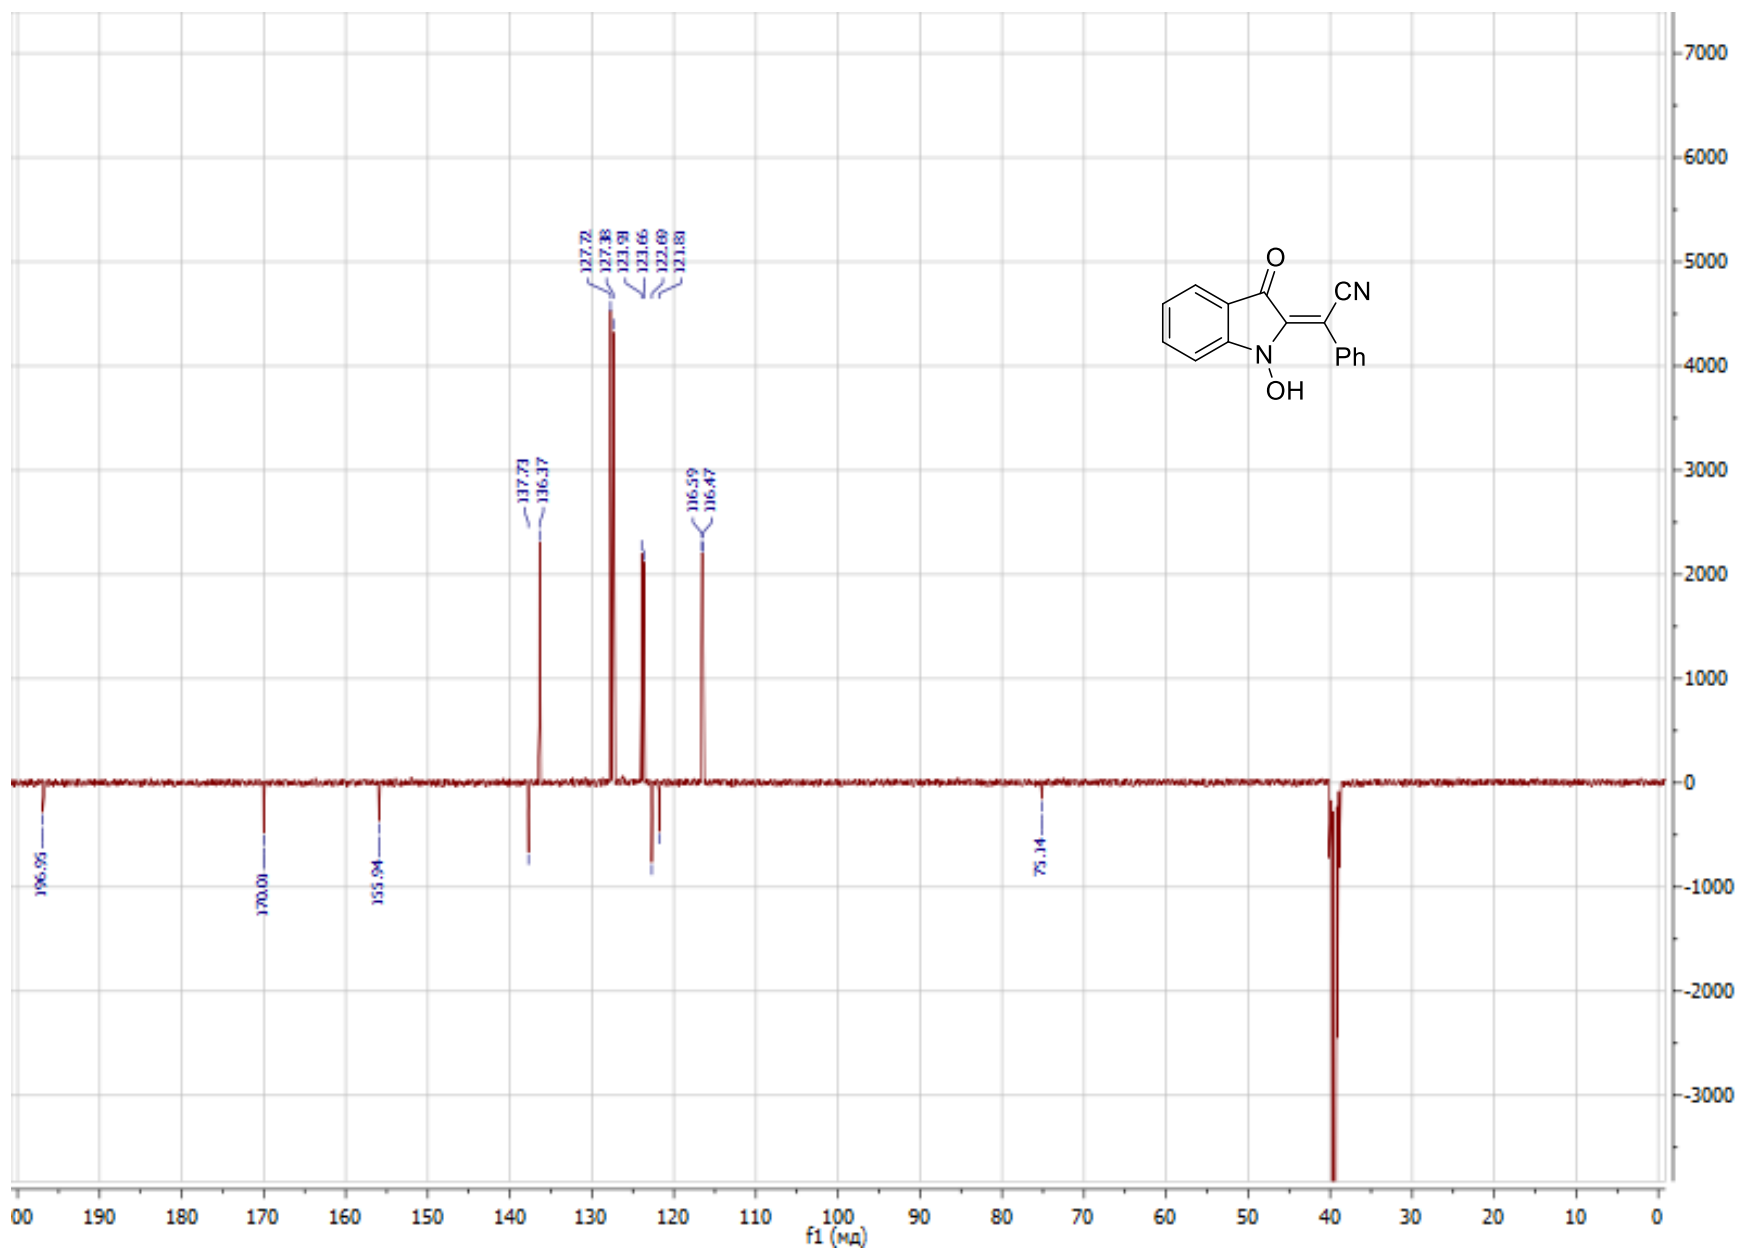

**Figure S48.**  $^{13}\text{C}$  DEPTQ NMR spectrum of 10ab in  $\text{DMSO}-d_6$  (100 MHz)

<sup>1</sup>H and <sup>13</sup>C NMR spectral charts for 4-oxo-2,4-diphenylbutanenitrile (12):

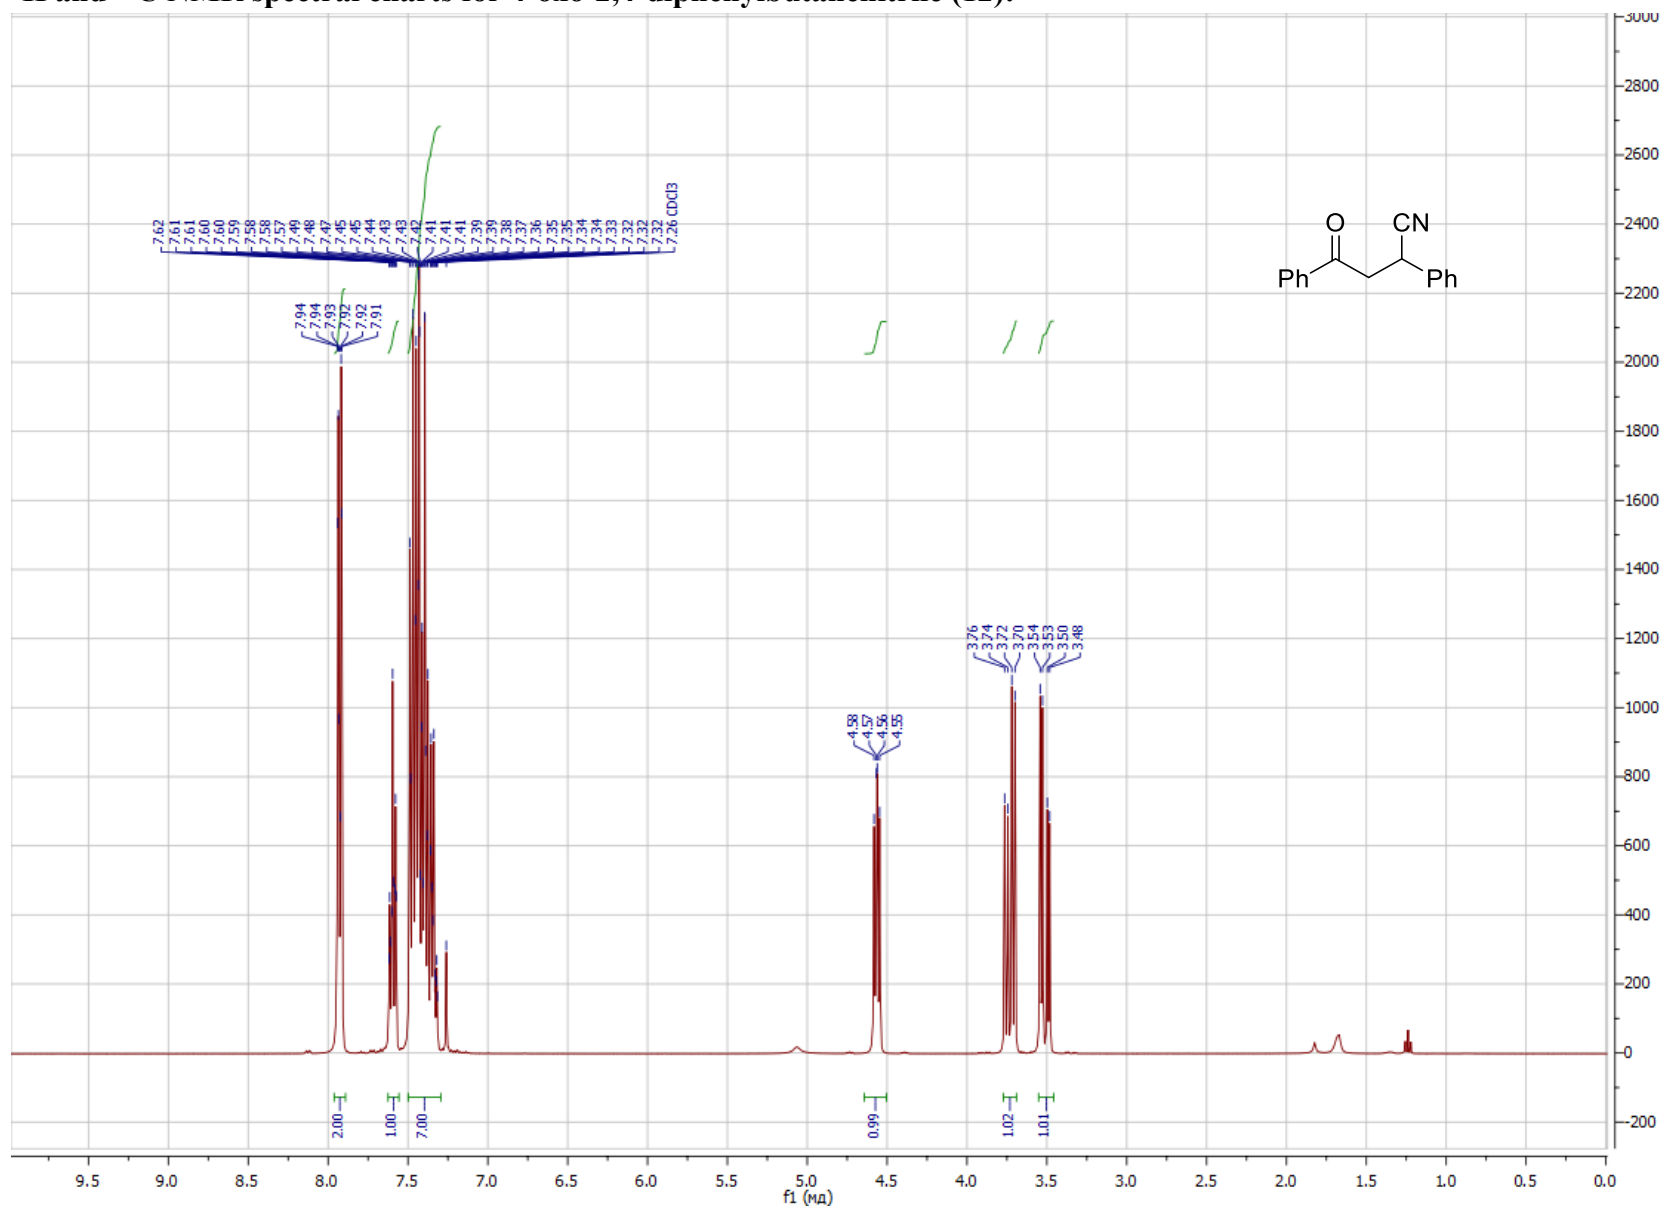

Figure S49. <sup>1</sup>H NMR spectrum of 12 in DMSO-*d*<sub>6</sub> (400 MHz)

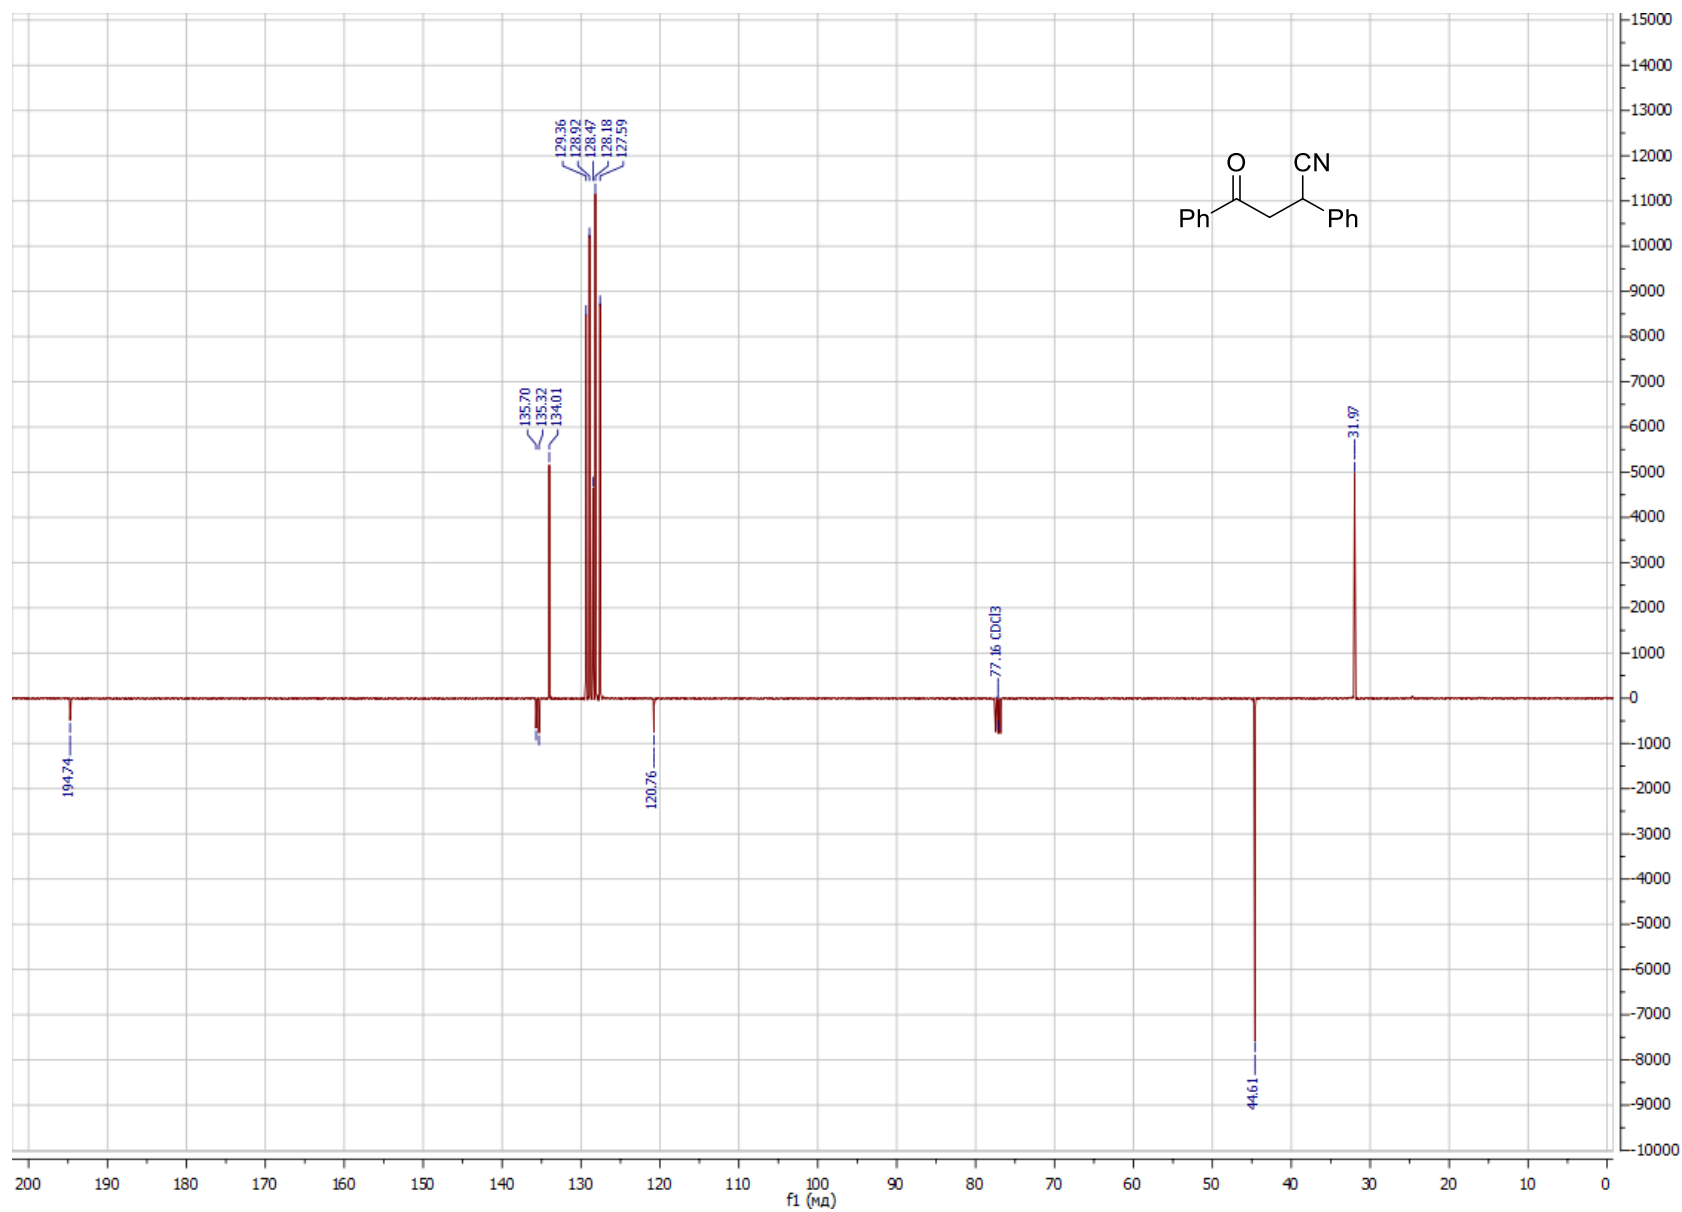

**Figure S50.**  $^{13}\text{C}$  DEPTQ NMR spectrum of 12 in  $\text{DMSO-}d_6$  (100 MHz)

$^1\text{H}$  and  $^{13}\text{C}$  NMR spectral charts for 5*b*-hydroxy-5*b*,10-dihydrobenzo[4',5']thieno[2',3':3,4]cyclopenta[1,2-*b*]indole-11-carbonitrile (2*ap*):

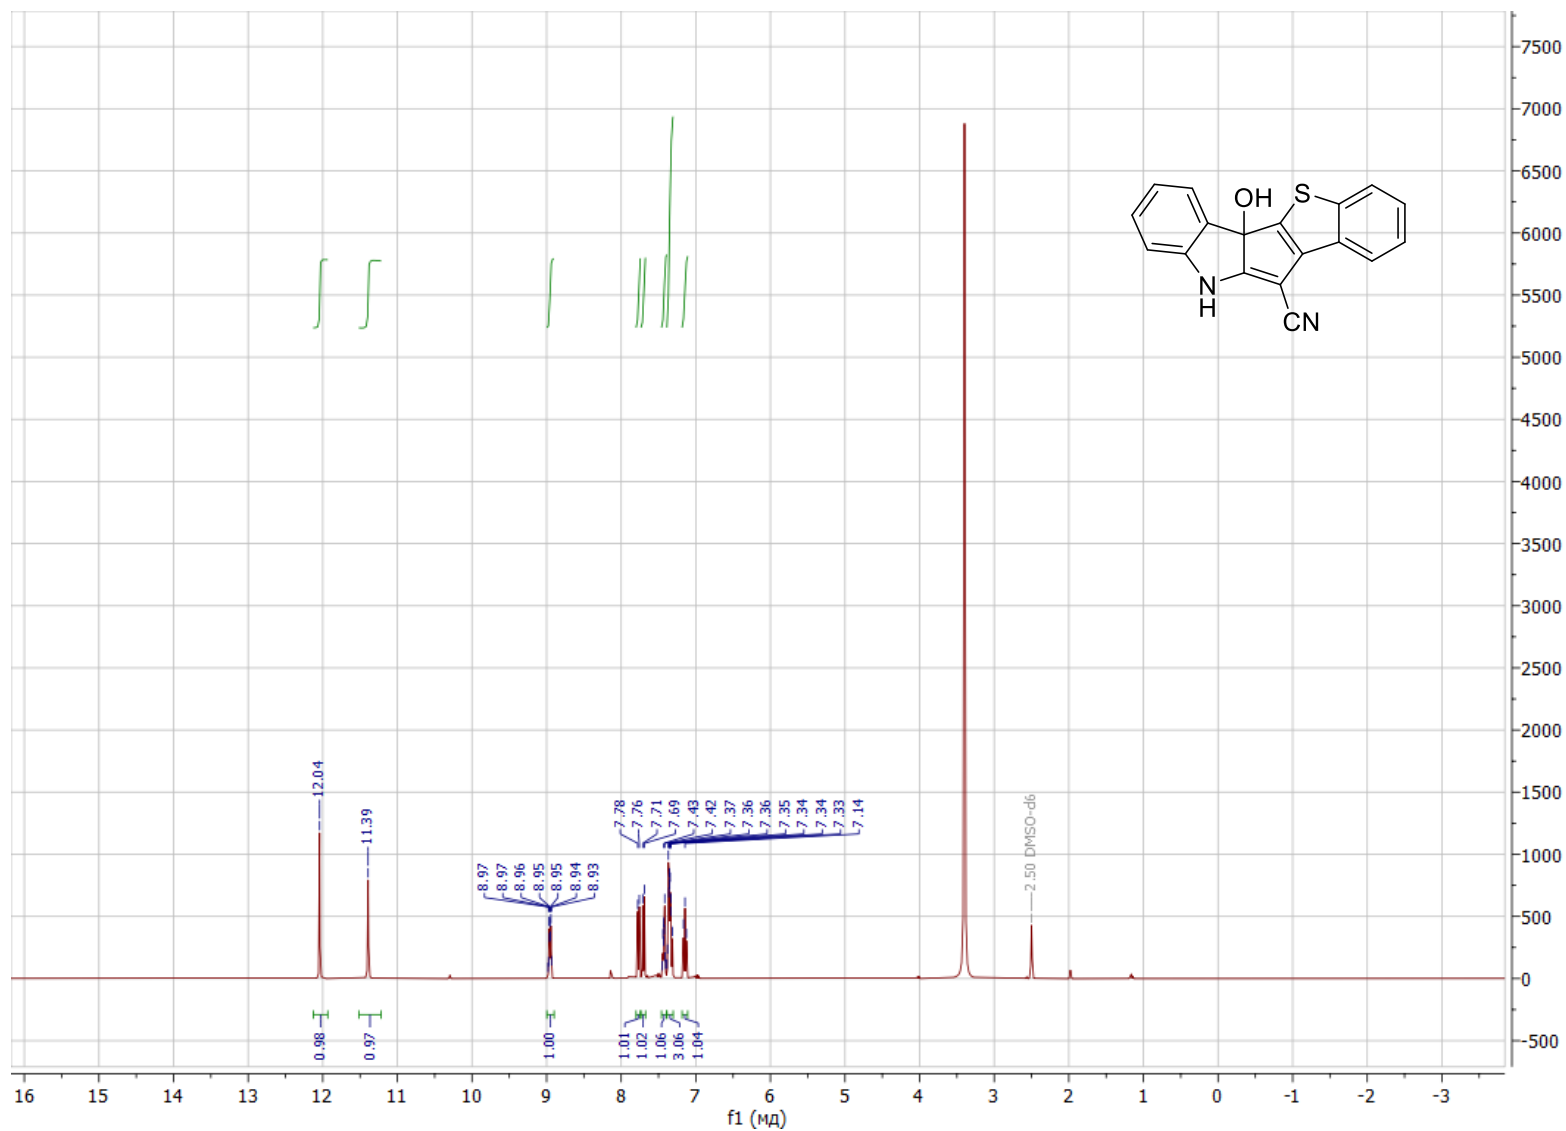

Figure S51.  $^1\text{H}$  NMR spectrum of 2*ap* in DMSO- $d_6$  (400 MHz)

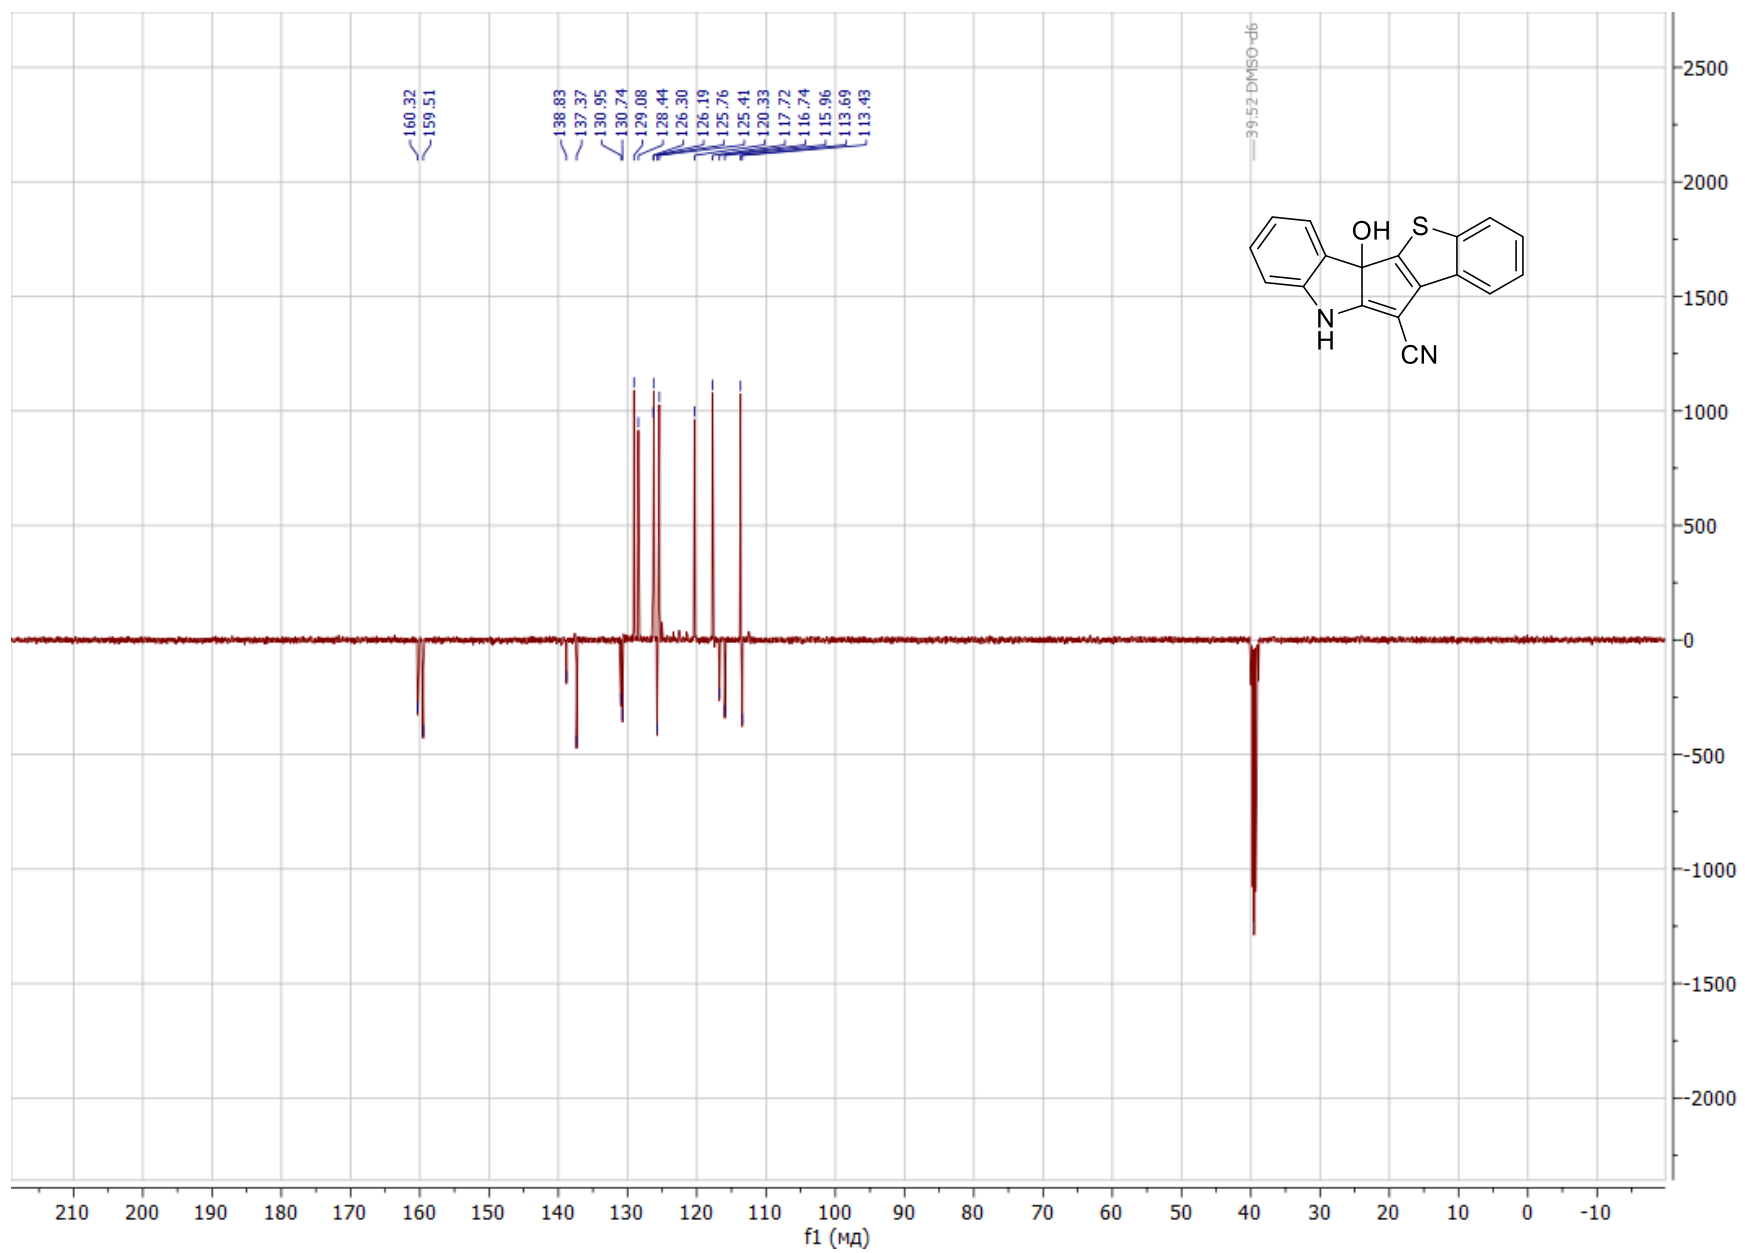

**Figure S52.**  $^{13}\text{C}$  DEPTQ NMR spectrum of 2ap in DMSO- $d_6$  (100 MHz)

## HRMS spectral charts

### HRMS spectral charts for (E)-2-aryl-2-(3-oxoindolin-2-ylidene)acetonitriles (**2aa-2cb**)

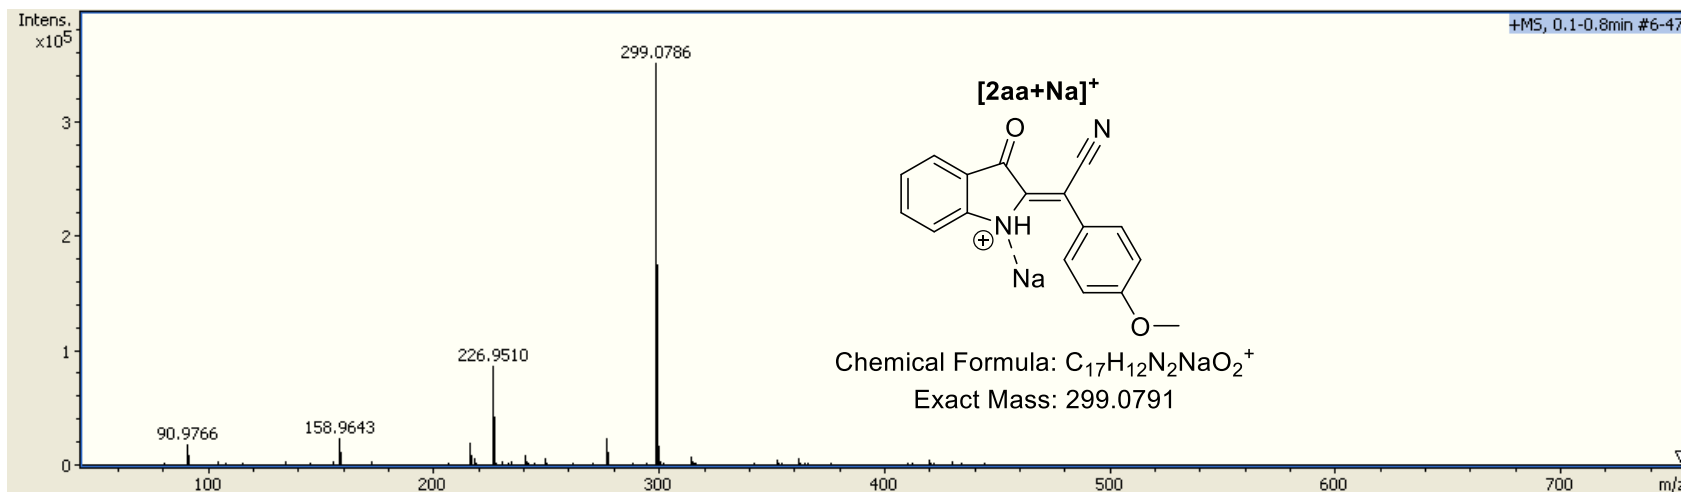

Figure S53. HRMS spectral chart for **2aa**

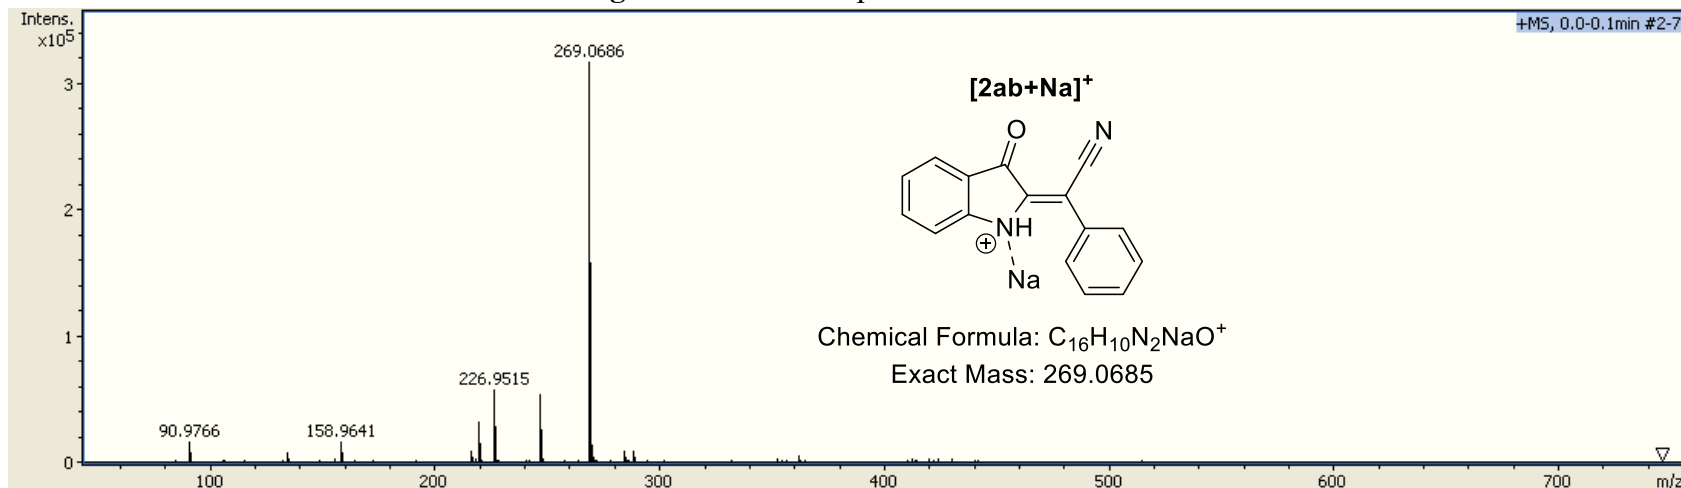

Figure S54. HRMS spectral chart for **2ab**

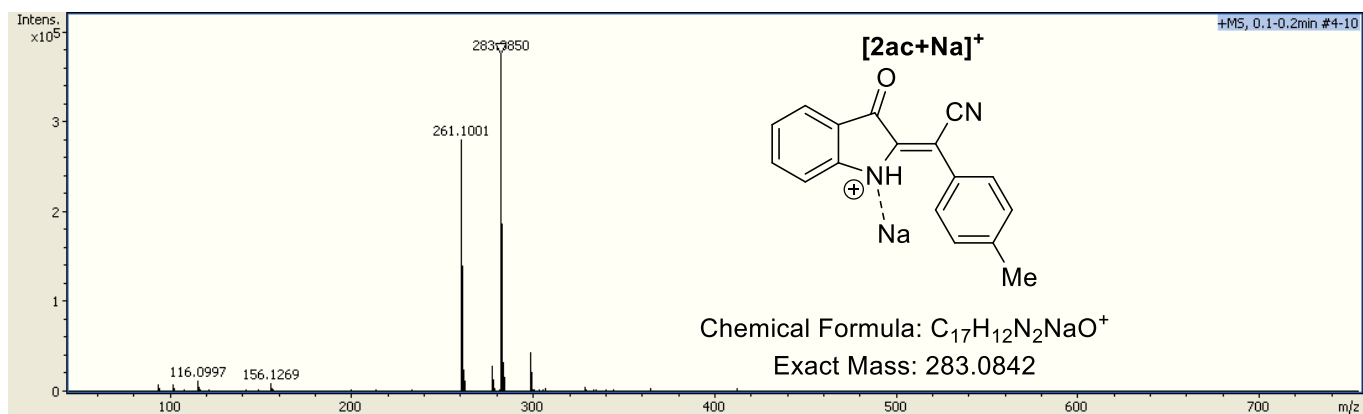

Figure S55. HRMS spectral chart for **2ac**

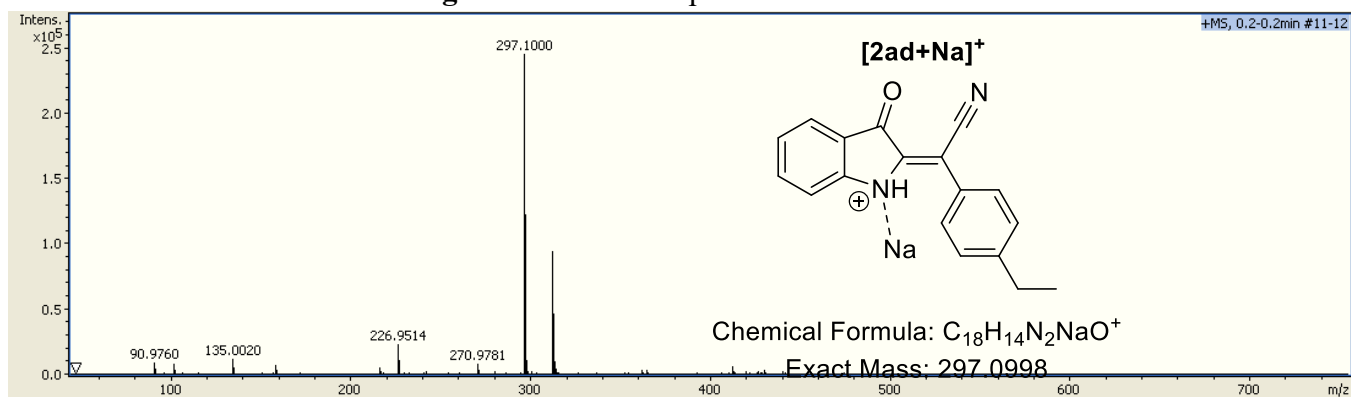

Figure S56. HRMS spectral chart for **2ad**

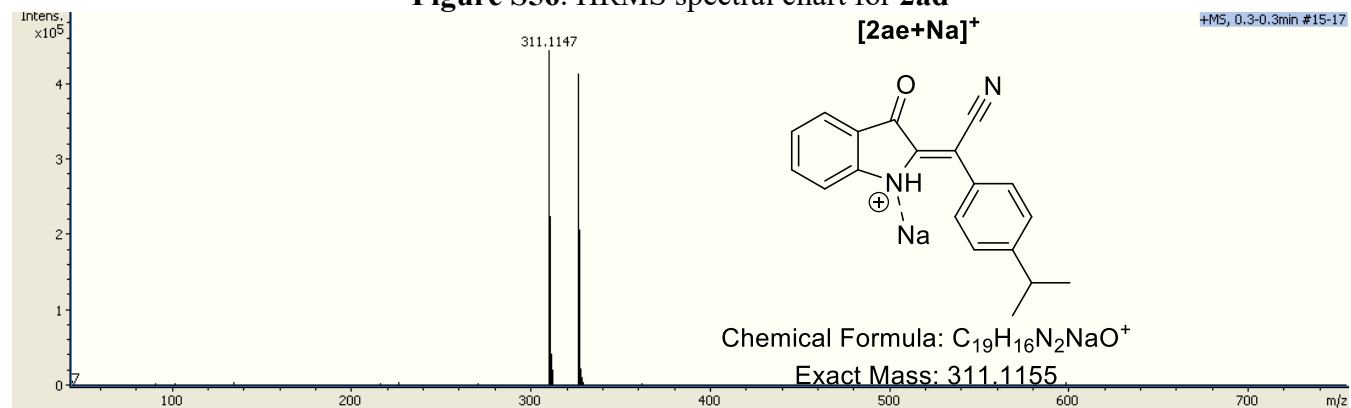

Figure S57. HRMS spectral chart for **2ae**

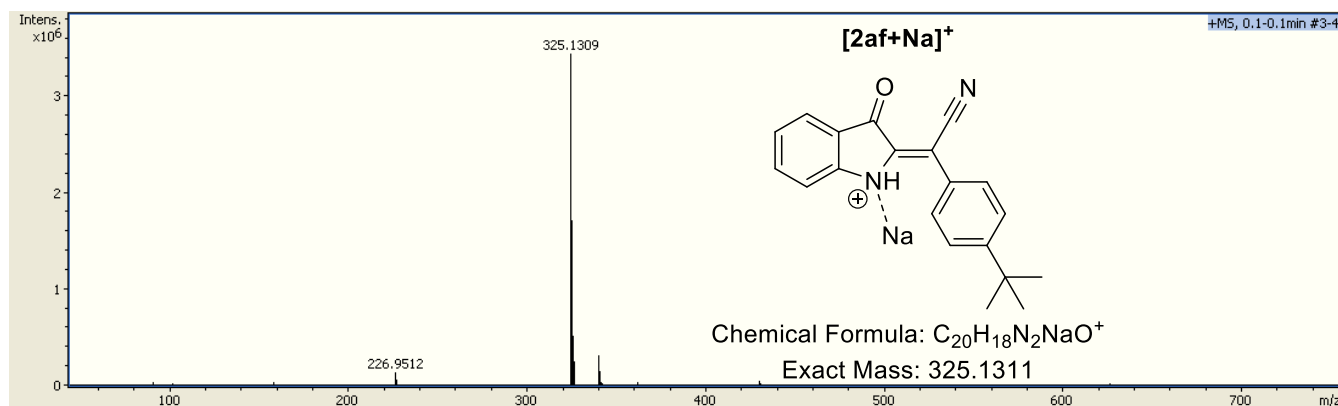

Figure S58. HRMS spectral chart for **2af**

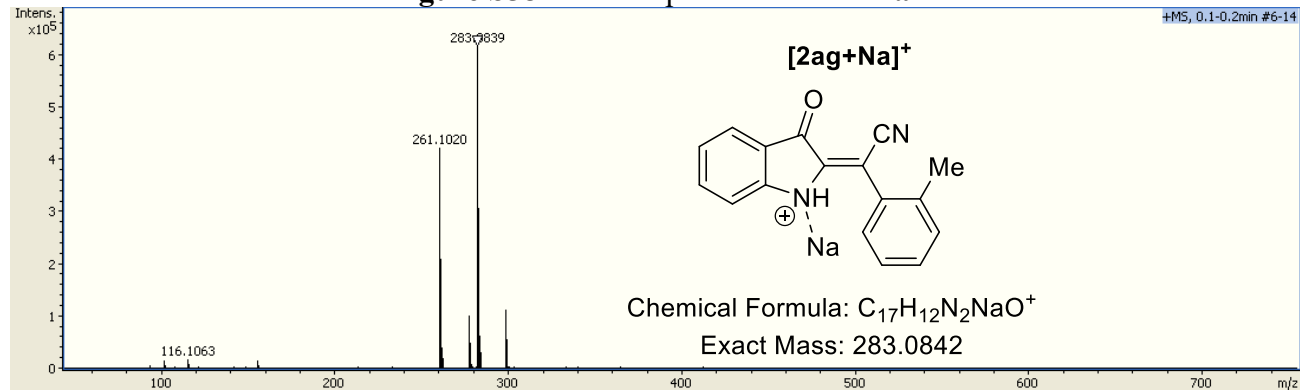

Figure S59. HRMS spectral chart for **2ag**

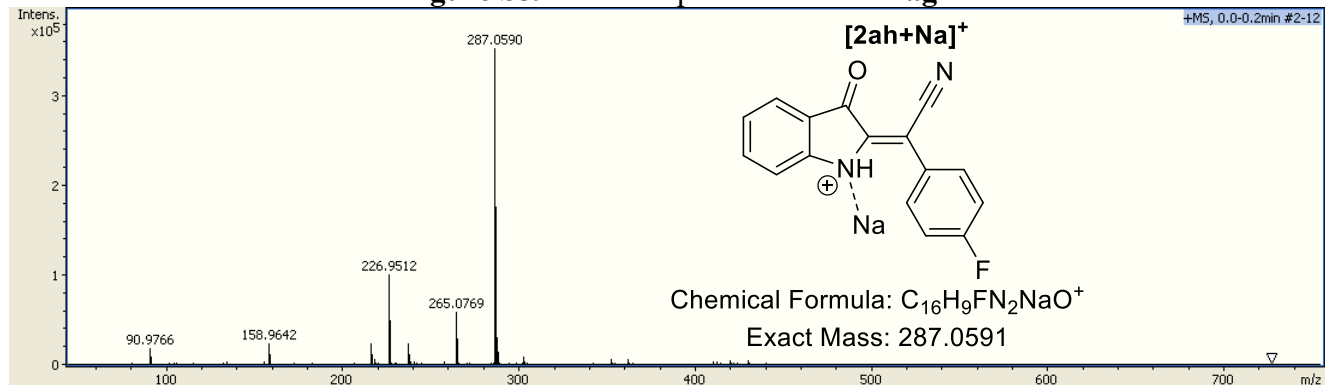

Figure S60. HRMS spectral chart for **2ah**

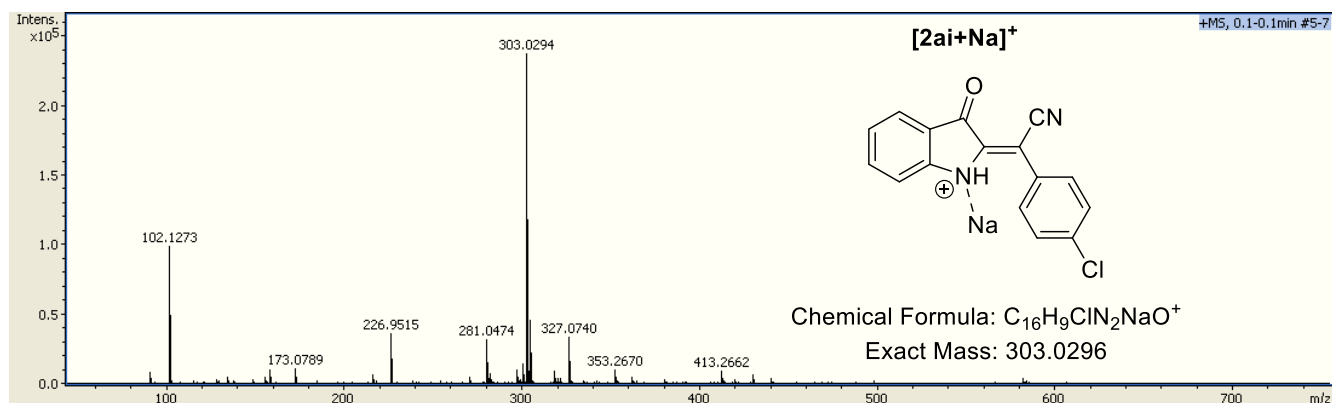

Figure S61. HRMS spectral chart for **2ai**

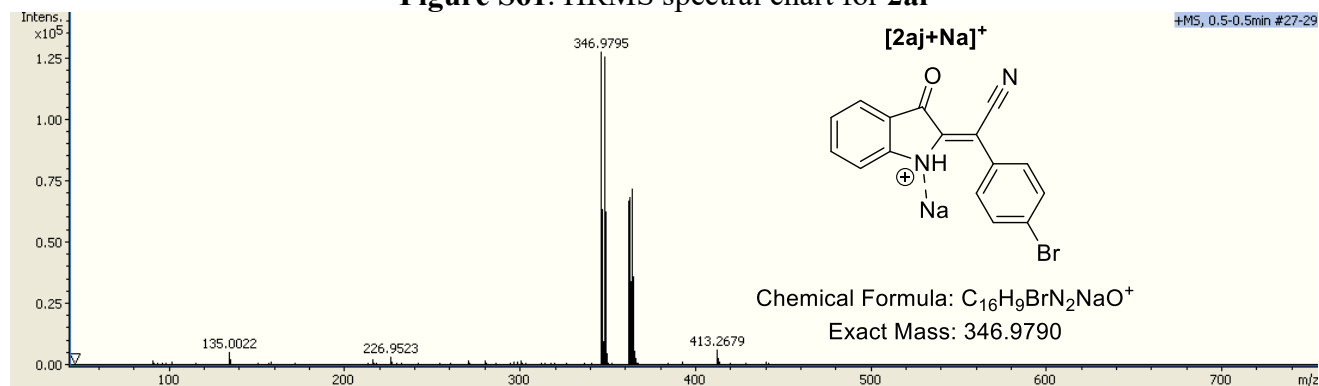

Figure S62. HRMS spectral chart for **2aj**

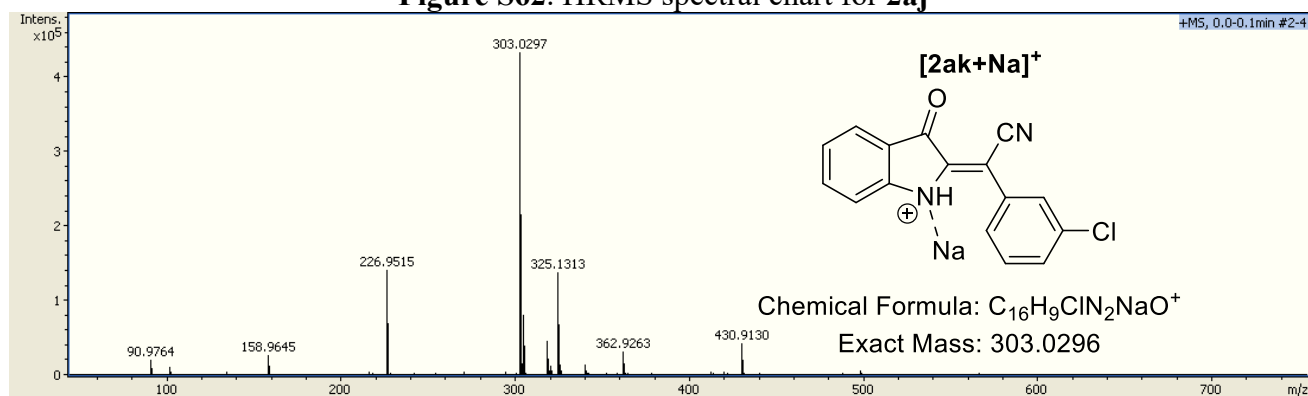

Figure S63. HRMS spectral chart for **2ak**

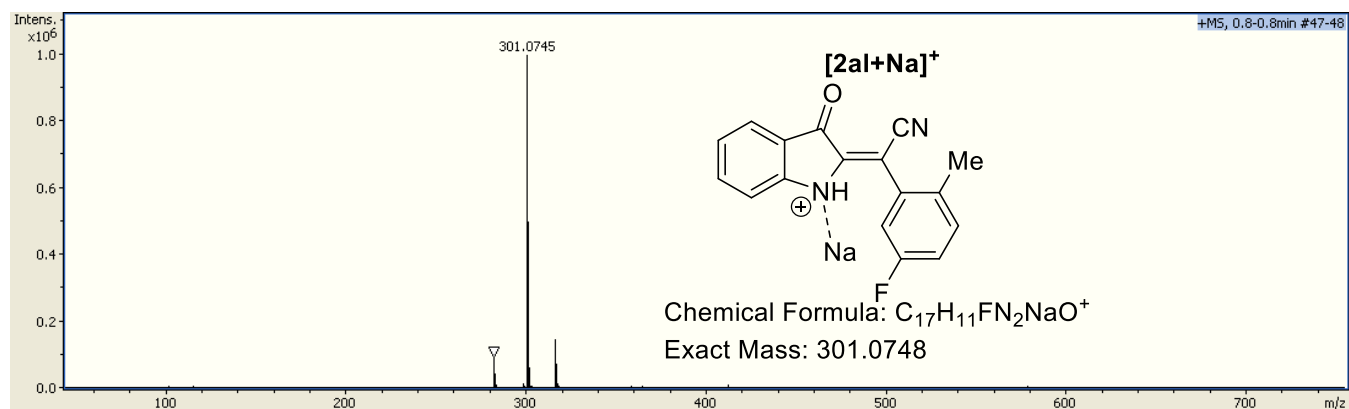

Figure S64. HRMS spectral chart for **2aI**

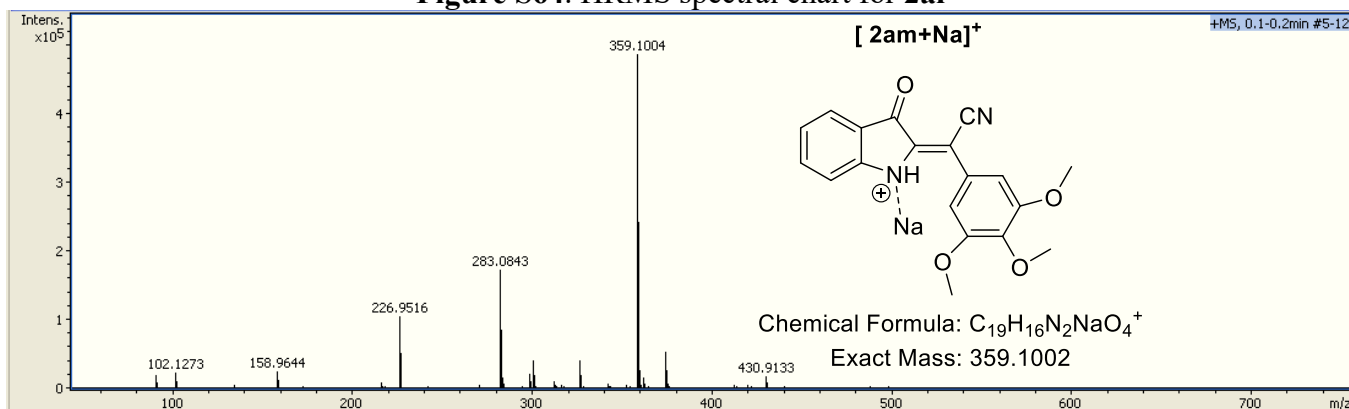

Figure S65. HRMS spectral chart for **2aM**

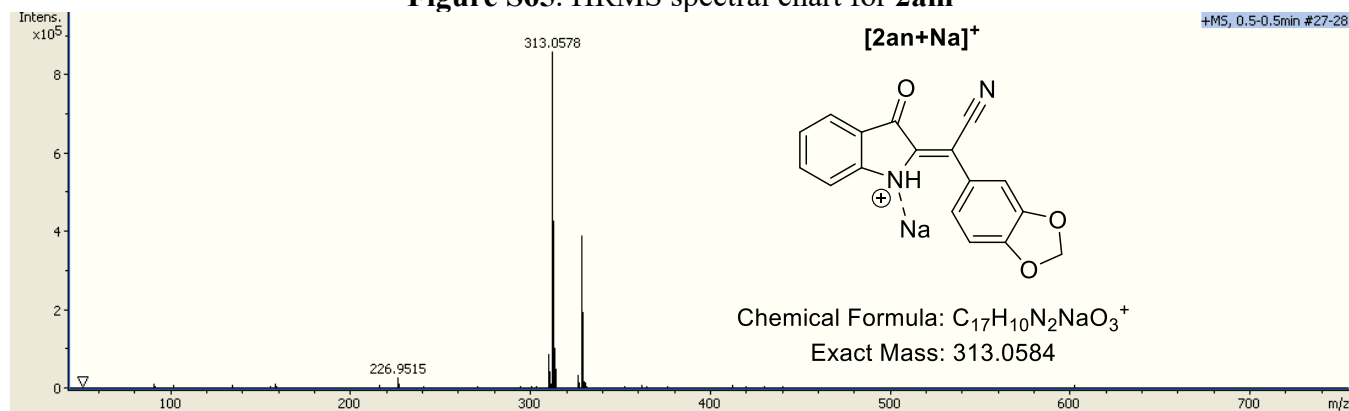

Figure S66. HRMS spectral chart for **2aN**

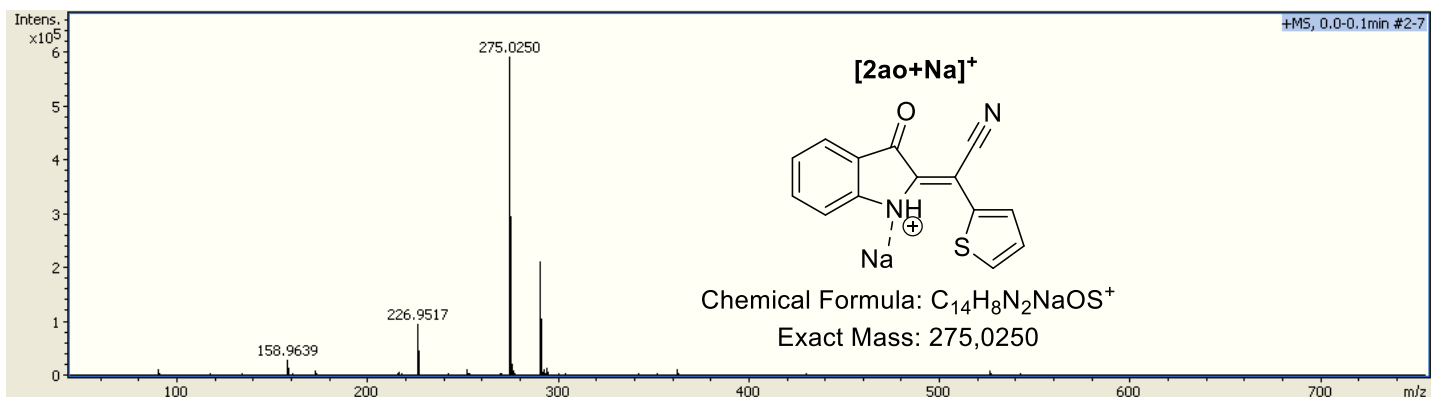

**Figure S67.** HRMS spectral chart for **2ao**

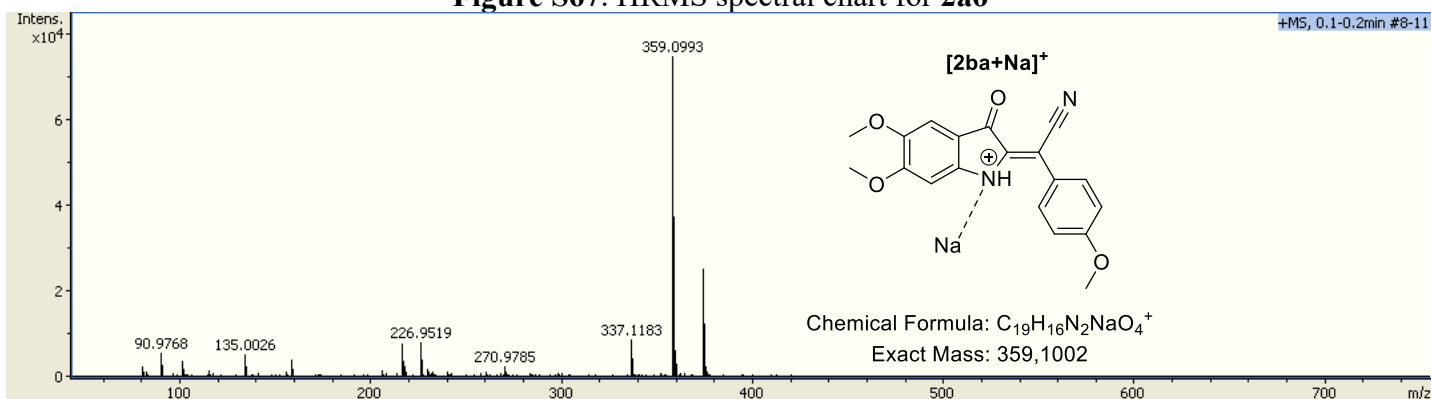

**Figure S68.** HRMS spectral chart for **2ba**

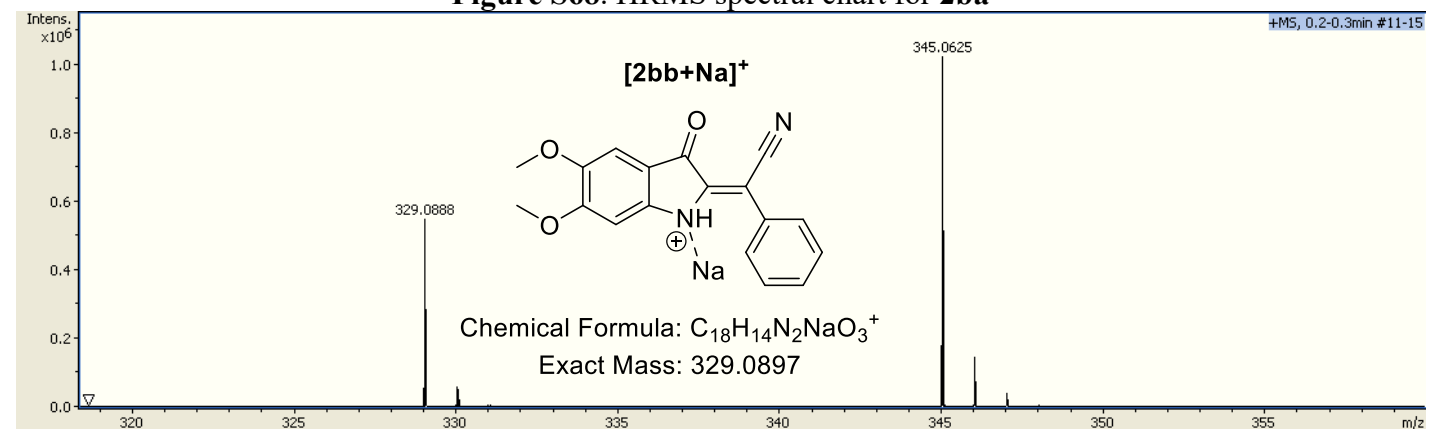

**Figure S69.** HRMS spectral chart for **2bb**

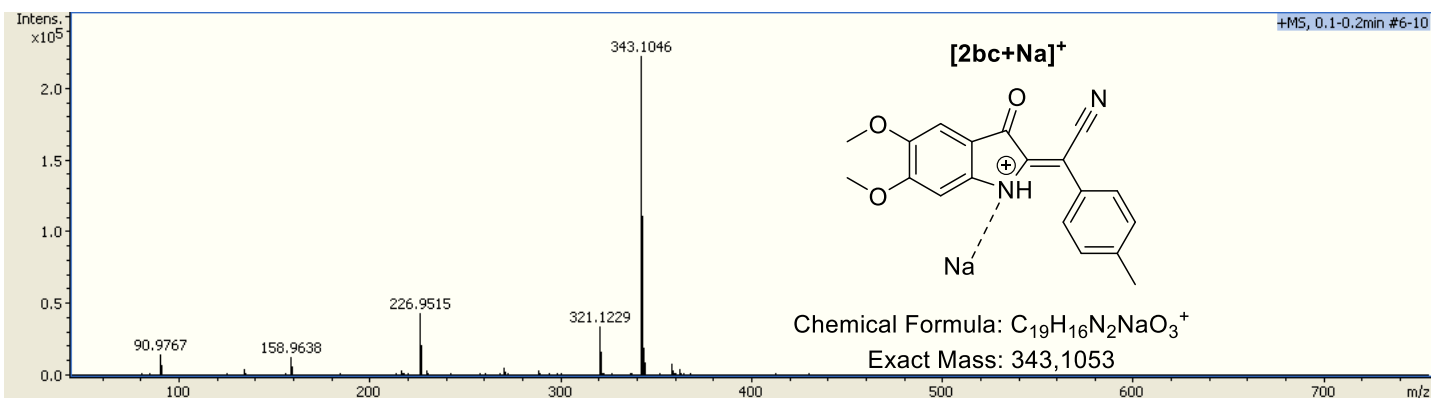

Figure S70. HRMS spectral chart for **2bc**

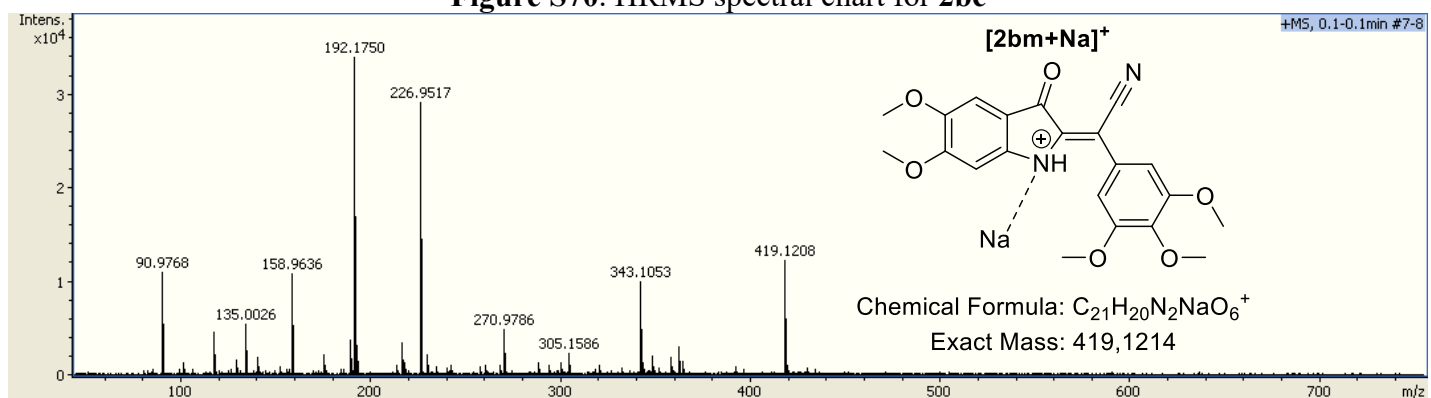

Figure S71. HRMS spectral chart for **2bm**

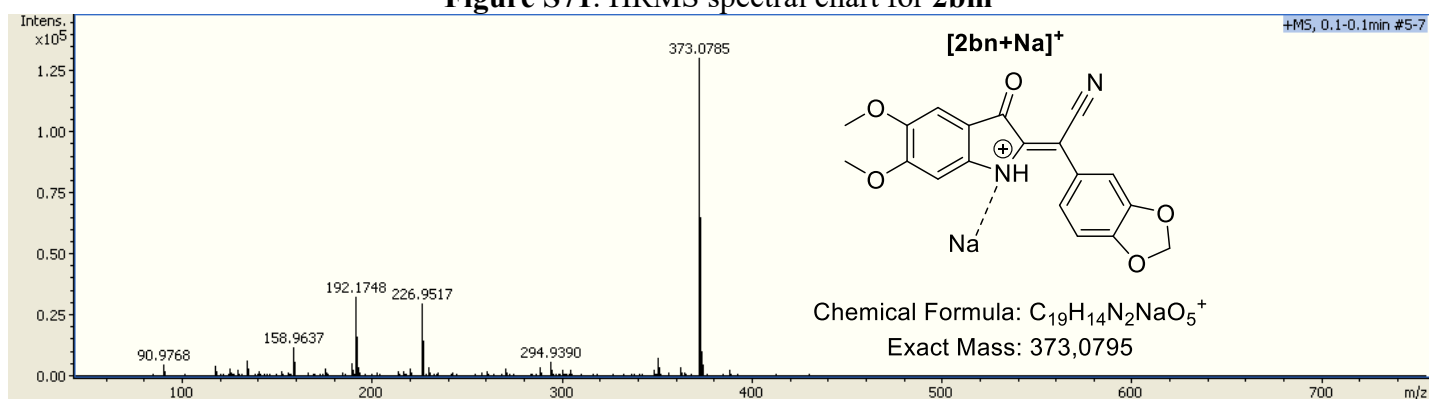

Figure S72. HRMS spectral chart for **2bn**

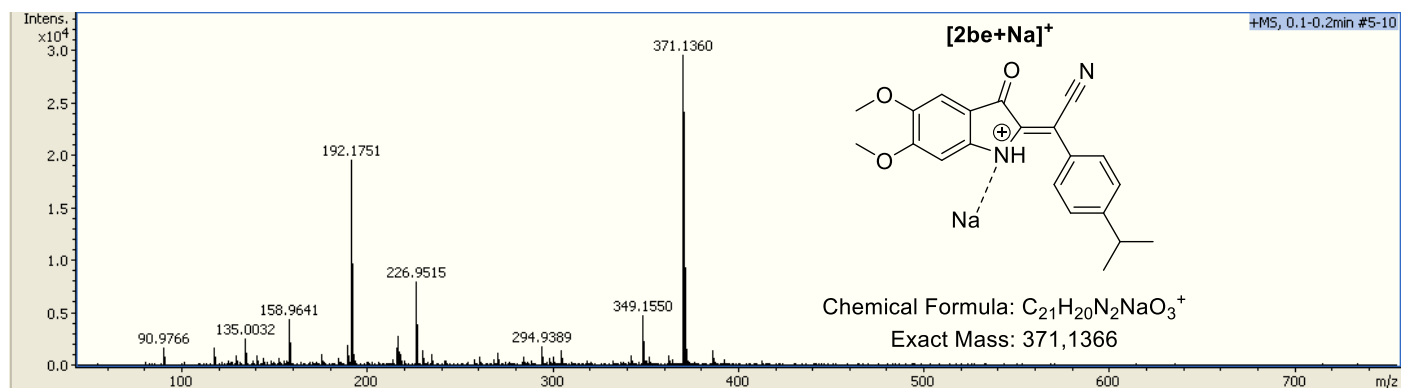

Figure S73. HRMS spectral chart for **2be**

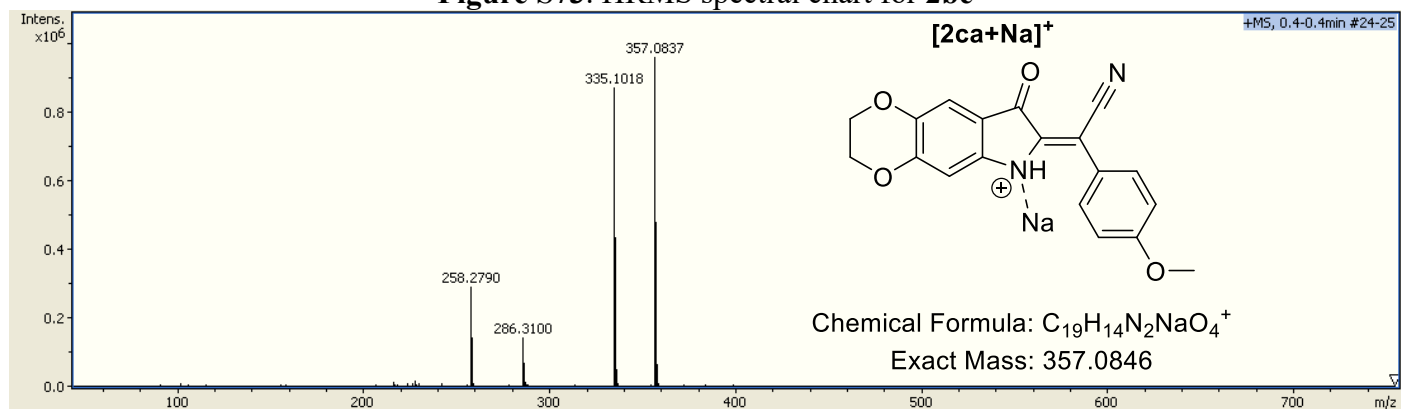

Figure S74. HRMS spectral chart for **2ca**

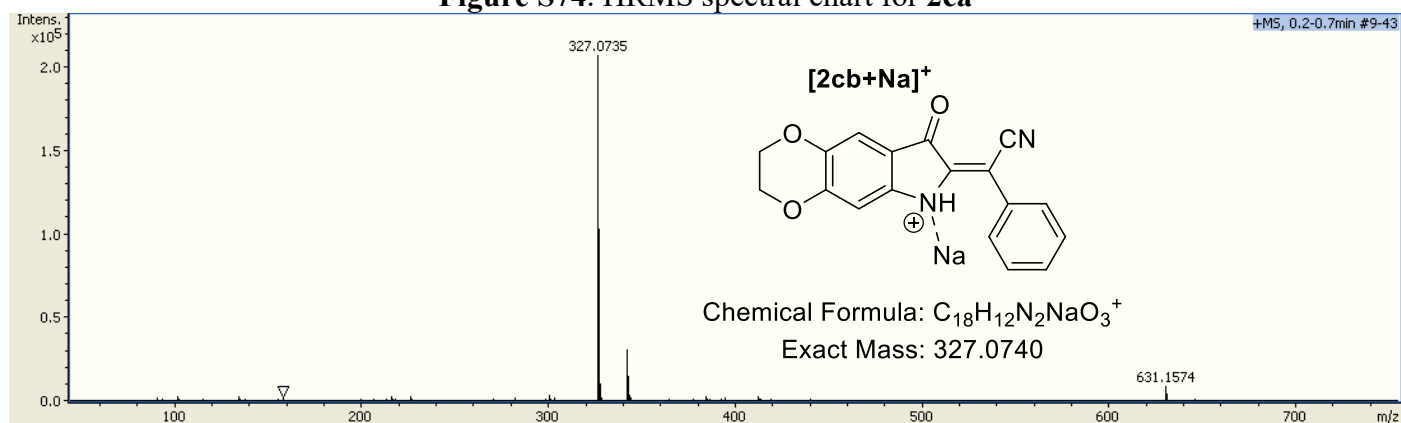

Figure S75. HRMS spectral chart for **2cb**

HRMS spectral charts for (*E*)-2-(1-hydroxy-3-oxoindolin-2-ylidene)-2-phenylacetonitrile (**10ab**):

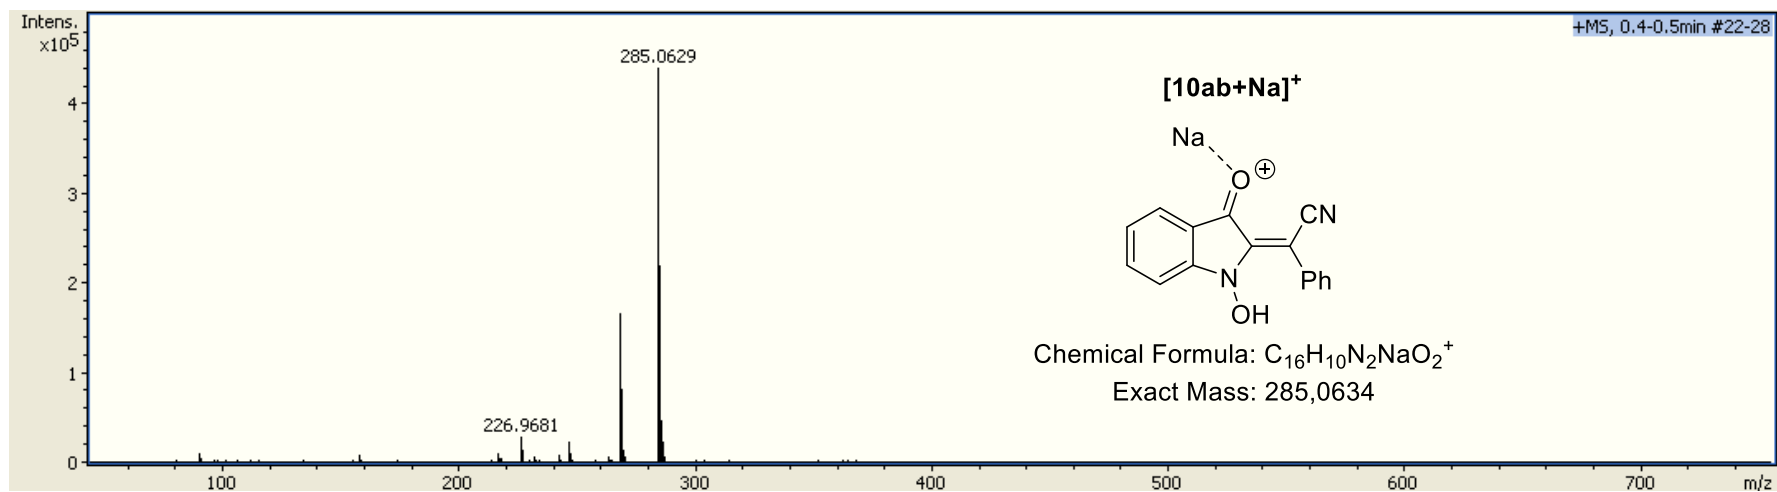

Figure S76. HRMS spectral chart for **2ab**

HRMS spectral charts for 4-oxo-2,4-diphenylbutanenitrile (12):

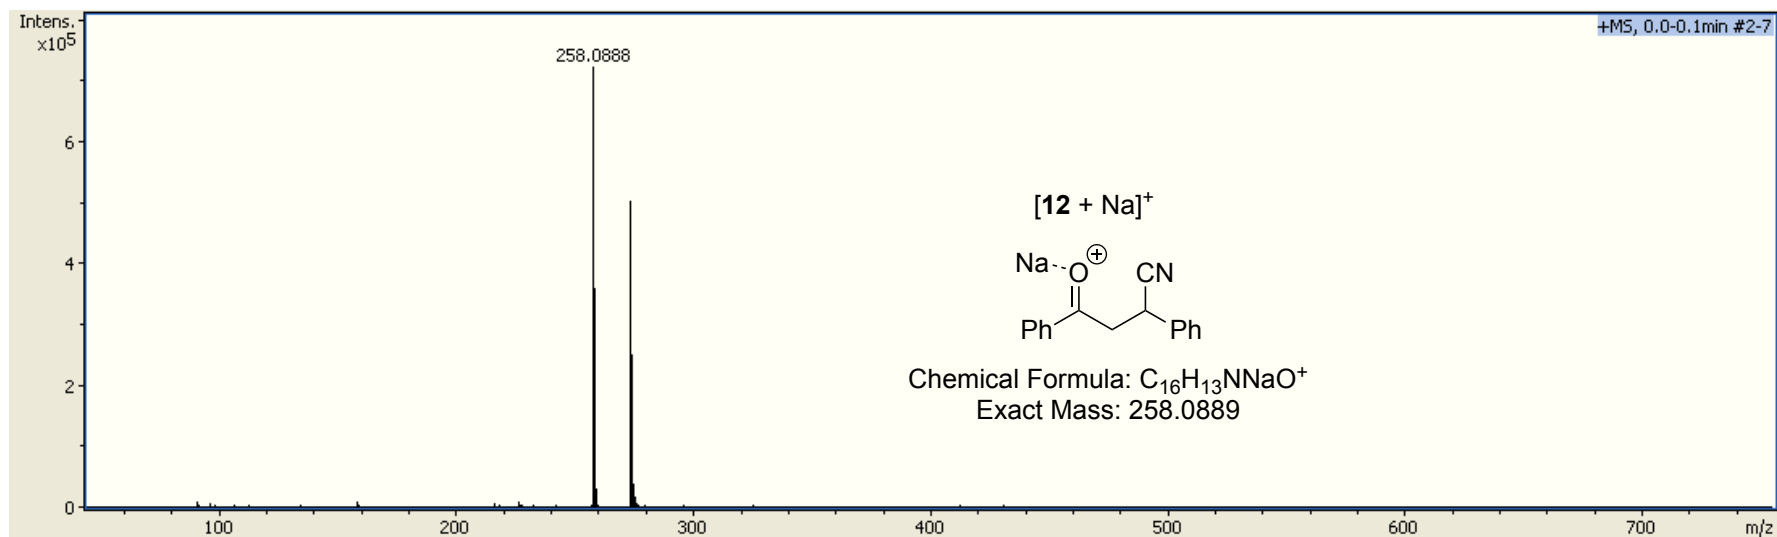

Figure S77. HRMS spectral chart for 12

HRMS spectral charts for 5*b*-hydroxy-5*b*,10-dihydrobenzo[4',5']thieno[2',3':3,4]cyclopenta[1,2-*b*]indole-11-carbonitrile (2*ap*):

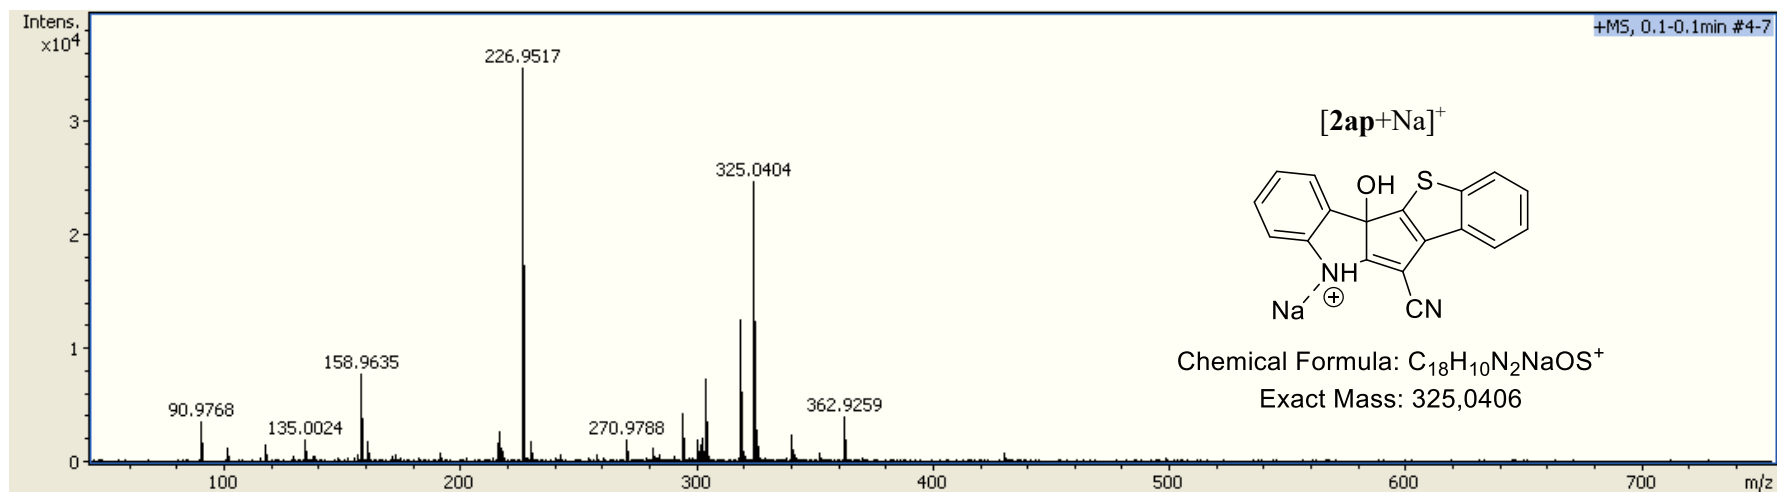

Figure S78. HRMS spectral chart for 2*ap*

## X-Ray crystallography data

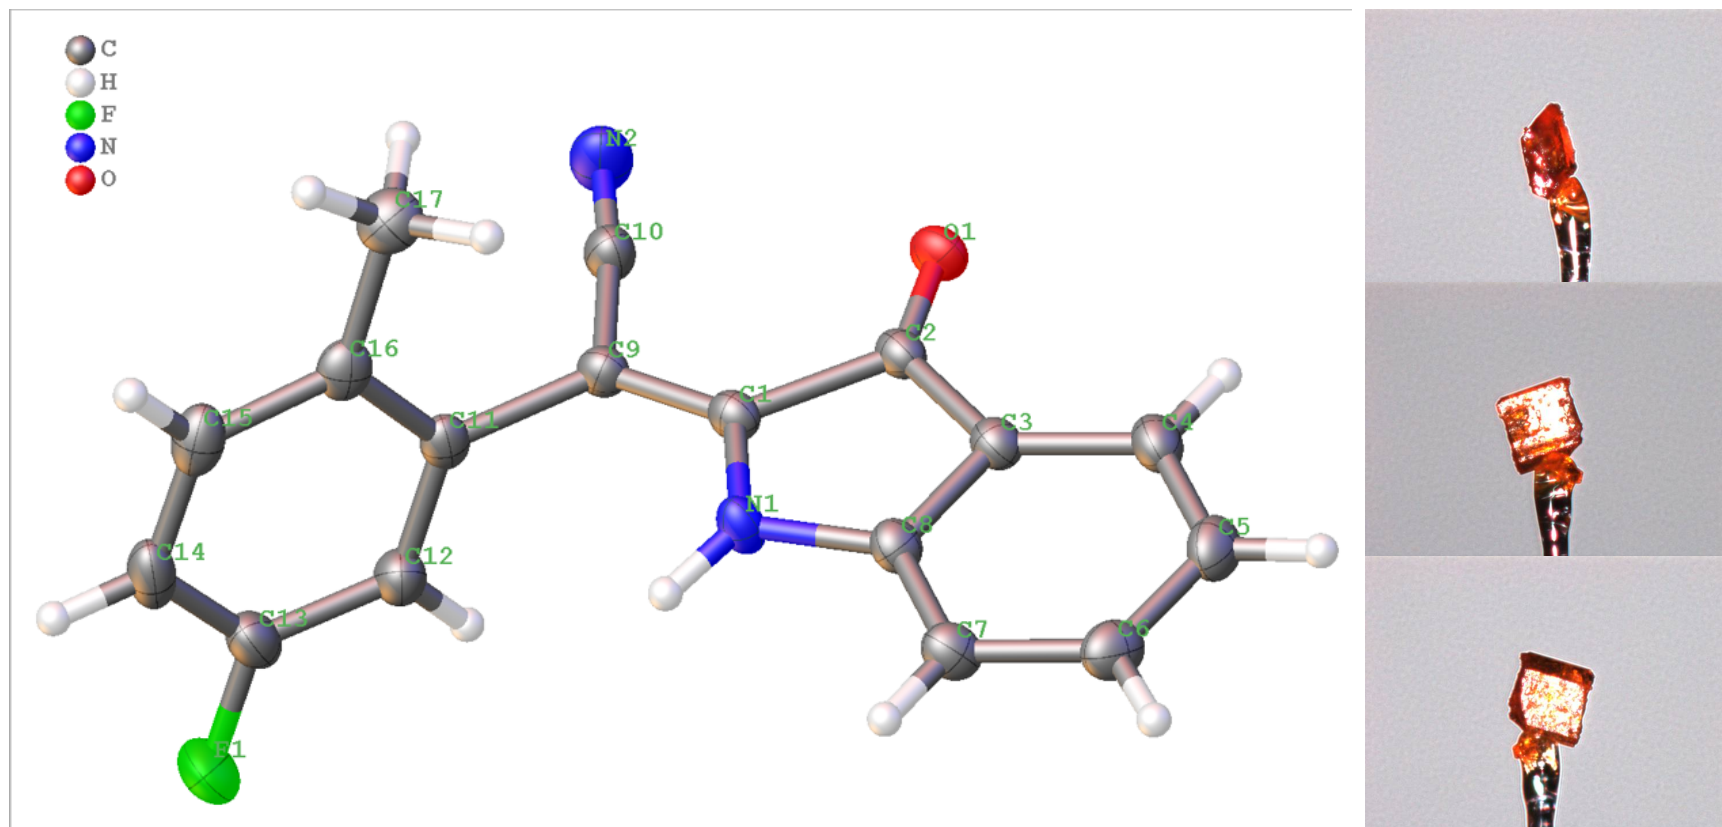

**Figure S79.** ORTEP drawing of the crystal structure showing 50% probability thermal ellipsoids (left, CCDC 2157035) and microphotography of the single crystal of compound **2aI** used for X-Ray diffraction analysis at the bottom.

**Table S1. Crystal data and structure refinement for 2aI.**

|                                             |                                                               |
|---------------------------------------------|---------------------------------------------------------------|
| Identification code                         | ANNA_nik544_2                                                 |
| Empirical formula                           | C <sub>17</sub> H <sub>11</sub> FN <sub>2</sub> O             |
| Formula weight                              | 278.28                                                        |
| Temperature/K                               | 100.00(10)                                                    |
| Crystal system                              | orthorhombic                                                  |
| Space group                                 | Pbca                                                          |
| a/Å                                         | 8.8927(3)                                                     |
| b/Å                                         | 12.5305(4)                                                    |
| c/Å                                         | 24.5955(10)                                                   |
| $\alpha$ /°                                 | 90                                                            |
| $\beta$ /°                                  | 90                                                            |
| $\gamma$ /°                                 | 90                                                            |
| Volume/Å <sup>3</sup>                       | 2740.68(17)                                                   |
| Z                                           | 8                                                             |
| $\rho_{\text{calc}}$ /cm <sup>3</sup>       | 1.349                                                         |
| $\mu$ /mm <sup>-1</sup>                     | 0.783                                                         |
| F(000)                                      | 1152.0                                                        |
| Crystal size/mm <sup>3</sup>                | 0.251 × 0.222 × 0.09                                          |
| Radiation                                   | Cu K $\alpha$ ( $\lambda$ = 1.54184)                          |
| 2 $\Theta$ range for data collection/°      | 7.188 to 152.588                                              |
| Index ranges                                | -8 ≤ h ≤ 11, -15 ≤ k ≤ 15, -27 ≤ l ≤ 30                       |
| Reflections collected                       | 15288                                                         |
| Independent reflections                     | 2868 [R <sub>int</sub> = 0.0215, R <sub>sigma</sub> = 0.0135] |
| Data/restraints/parameters                  | 2868/0/195                                                    |
| Goodness-of-fit on F <sup>2</sup>           | 1.070                                                         |
| Final R indexes [I ≥ 2 $\sigma$ (I)]        | R <sub>1</sub> = 0.0381, wR <sub>2</sub> = 0.0909             |
| Final R indexes [all data]                  | R <sub>1</sub> = 0.0394, wR <sub>2</sub> = 0.0920             |
| Largest diff. peak/hole / e Å <sup>-3</sup> | 0.24/-0.19                                                    |

**Table S2. Fractional Atomic Coordinates ( $\times 10^4$ ) and Equivalent Isotropic Displacement Parameters ( $\text{\AA}^2 \times 10^3$ ) for 2aI.  $U_{\text{eq}}$  is defined as 1/3 of the trace of the orthogonalised  $U_{\text{IJ}}$  tensor.**

| Atom | x          | y          | z         | $U(\text{eq})$ |
|------|------------|------------|-----------|----------------|
| F1   | -810.1(10) | 2610.3(7)  | 6658.5(4) | 45.8(2)        |
| O1   | 3874.0(10) | 7291.9(6)  | 5619.9(3) | 26.53(19)      |
| N1   | 4497.3(11) | 4729.0(8)  | 6129.7(4) | 23.3(2)        |
| N2   | 723.5(14)  | 7457.4(9)  | 6346.5(5) | 37.1(3)        |
| C8   | 5723.8(12) | 4846.8(9)  | 5779.7(5) | 22.5(2)        |
| C2   | 4347.2(13) | 6409.5(9)  | 5728.5(4) | 21.4(2)        |
| C1   | 3603.8(13) | 5611.9(9)  | 6114.1(4) | 21.1(2)        |
| C3   | 5695.8(13) | 5853.7(9)  | 5534.9(5) | 22.5(2)        |
| C11  | 1666.4(13) | 4895.8(9)  | 6755.5(5) | 22.8(2)        |
| C9   | 2300.6(13) | 5741.5(9)  | 6389.7(4) | 22.2(2)        |
| C16  | 2012.7(13) | 4895.5(9)  | 7310.9(5) | 25.1(2)        |
| C7   | 6840.9(13) | 4108.4(10) | 5666.4(5) | 26.7(2)        |
| C10  | 1472.6(14) | 6710.9(9)  | 6347.3(5) | 26.7(3)        |
| C4   | 6803.4(13) | 6152.9(10) | 5165.3(5) | 26.8(2)        |
| C12  | 720.4(14)  | 4124.1(10) | 6533.3(5) | 28.4(3)        |
| C15  | 1391.6(14) | 4089.4(10) | 7633.6(5) | 30.7(3)        |
| C6   | 7934.9(13) | 4418.0(11) | 5294.5(5) | 29.8(3)        |
| C14  | 444.3(15)  | 3322.1(10) | 7420.1(6) | 32.4(3)        |
| C13  | 128.0(15)  | 3356.6(10) | 6872.4(6) | 31.6(3)        |
| C5   | 7923.9(14) | 5421.4(11) | 5048.4(5) | 30.6(3)        |
| C17  | 2993.9(15) | 5742.7(10) | 7556.9(5) | 31.8(3)        |

**Table S3. Anisotropic Displacement Parameters ( $\text{\AA}^2 \times 10^3$ ) for 2al. The Anisotropic displacement factor exponent takes the form: -  $2\pi^2[h^2a^{*2}U_{11}+2hka^*b^*U_{12}+\dots]$ .**

| Atom | $U_{11}$ | $U_{22}$ | $U_{33}$ | $U_{23}$ | $U_{13}$ | $U_{12}$ |
|------|----------|----------|----------|----------|----------|----------|
| F1   | 51.8(5)  | 36.2(4)  | 49.3(5)  | -3.9(4)  | 14.9(4)  | -20.7(4) |
| O1   | 33.4(4)  | 18.5(4)  | 27.7(4)  | 4.2(3)   | 0.4(3)   | 1.3(3)   |
| N1   | 21.6(5)  | 18.7(5)  | 29.6(5)  | 6.6(4)   | 4.4(4)   | 1.8(4)   |
| N2   | 43.0(6)  | 24.7(5)  | 43.5(7)  | 5.4(5)   | 12.9(5)  | 9.9(5)   |
| C8   | 19.7(5)  | 22.9(5)  | 24.9(5)  | 1.1(4)   | 0.0(4)   | -2.1(4)  |
| C2   | 25.0(5)  | 18.7(5)  | 20.5(5)  | 1.6(4)   | -0.7(4)  | -2.7(4)  |
| C1   | 23.5(5)  | 18.0(5)  | 21.7(5)  | 2.3(4)   | -0.9(4)  | -0.1(4)  |
| C3   | 22.6(5)  | 21.3(5)  | 23.6(5)  | 0.7(4)   | 0.0(4)   | -2.6(4)  |
| C11  | 22.1(5)  | 19.5(5)  | 26.7(5)  | 3.0(4)   | 6.1(4)   | 5.0(4)   |
| C9   | 25.1(5)  | 18.3(5)  | 23.3(5)  | 1.7(4)   | 1.8(4)   | 1.7(4)   |
| C16  | 21.4(5)  | 26.0(6)  | 27.8(6)  | 3.1(4)   | 2.8(4)   | 8.3(4)   |
| C7   | 21.9(5)  | 24.1(6)  | 34.0(6)  | 0.8(5)   | -0.5(5)  | 0.7(4)   |
| C10  | 30.9(6)  | 22.0(6)  | 27.1(6)  | 2.5(4)   | 7.2(5)   | 1.5(5)   |
| C4   | 27.6(6)  | 26.8(6)  | 26.0(5)  | 1.8(4)   | 2.0(5)   | -6.8(5)  |
| C12  | 33.0(6)  | 25.5(6)  | 26.7(6)  | 0.5(5)   | 6.7(5)   | -2.0(5)  |
| C15  | 29.9(6)  | 34.3(6)  | 27.9(6)  | 8.8(5)   | 6.4(5)   | 10.6(5)  |
| C6   | 20.1(5)  | 33.4(6)  | 35.9(6)  | -6.3(5)  | 1.8(5)   | 0.2(5)   |
| C14  | 32.9(6)  | 27.1(6)  | 37.1(7)  | 10.0(5)  | 14.6(5)  | 5.3(5)   |
| C13  | 32.1(6)  | 23.8(6)  | 39.0(7)  | -0.7(5)  | 10.7(5)  | -4.1(5)  |
| C5   | 23.2(6)  | 37.9(7)  | 30.7(6)  | -2.3(5)  | 5.3(5)   | -7.0(5)  |
| C17  | 31.1(6)  | 34.2(7)  | 30.1(6)  | 1.0(5)   | -3.5(5)  | 4.9(5)   |

**Table S4. Bond Lengths for 2al.**

| Atom | Atom | Length/Å   | Atom | Atom | Length/Å   |
|------|------|------------|------|------|------------|
| F1   | C13  | 1.3591(15) | C11  | C16  | 1.4004(17) |
| O1   | C2   | 1.2128(14) | C11  | C12  | 1.3934(17) |
| N1   | C8   | 1.3972(15) | C9   | C10  | 1.4244(16) |
| N1   | C1   | 1.3626(14) | C16  | C15  | 1.3982(17) |
| N2   | C10  | 1.1483(16) | C16  | C17  | 1.5015(18) |
| C8   | C3   | 1.3982(16) | C7   | C6   | 1.3905(18) |
| C8   | C7   | 1.3859(16) | C4   | C5   | 1.3842(18) |
| C2   | C1   | 1.5283(15) | C12  | C13  | 1.3777(17) |
| C2   | C3   | 1.4663(16) | C15  | C14  | 1.382(2)   |
| C1   | C9   | 1.3523(16) | C6   | C5   | 1.3955(19) |
| C3   | C4   | 1.3919(16) | C14  | C13  | 1.377(2)   |
| C11  | C9   | 1.5002(15) |      |      |            |

**Table S5. Bond Angles for 2aI.**

| Atom | Atom | Atom | Angle/°    | Atom | Atom | Atom | Angle/°    |
|------|------|------|------------|------|------|------|------------|
| C1   | N1   | C8   | 110.62(9)  | C1   | C9   | C10  | 120.58(10) |
| N1   | C8   | C3   | 110.29(10) | C10  | C9   | C11  | 116.88(10) |
| C7   | C8   | N1   | 127.80(11) | C11  | C16  | C17  | 121.37(11) |
| C7   | C8   | C3   | 121.91(11) | C15  | C16  | C11  | 117.84(12) |
| O1   | C2   | C1   | 125.65(10) | C15  | C16  | C17  | 120.78(11) |
| O1   | C2   | C3   | 130.19(11) | C8   | C7   | C6   | 116.59(11) |
| C3   | C2   | C1   | 104.16(9)  | N2   | C10  | C9   | 174.10(13) |
| N1   | C1   | C2   | 107.23(9)  | C5   | C4   | C3   | 117.82(11) |
| C9   | C1   | N1   | 125.67(10) | C13  | C12  | C11  | 118.54(12) |
| C9   | C1   | C2   | 127.10(10) | C14  | C15  | C16  | 121.86(12) |
| C8   | C3   | C2   | 107.66(10) | C7   | C6   | C5   | 122.13(11) |
| C4   | C3   | C8   | 120.78(11) | C13  | C14  | C15  | 118.32(11) |
| C4   | C3   | C2   | 131.52(11) | F1   | C13  | C12  | 118.73(12) |
| C16  | C11  | C9   | 120.17(11) | F1   | C13  | C14  | 118.85(11) |
| C12  | C11  | C9   | 118.81(10) | C14  | C13  | C12  | 122.42(12) |
| C12  | C11  | C16  | 121.01(11) | C4   | C5   | C6   | 120.77(11) |
| C1   | C9   | C11  | 122.54(10) |      |      |      |            |

**Table S6. Torsion Angles for 2aI.**

| A  | B  | C  | D   | Angle/°            | A   | B   | C   | D   | Angle/°            |
|----|----|----|-----|--------------------|-----|-----|-----|-----|--------------------|
| O1 | C2 | C1 | N1  | $\bar{179.18(11)}$ | C3  | C2  | C1  | C9  | $\bar{178.55(11)}$ |
| O1 | C2 | C1 | C9  | $1.12(19)$         | C3  | C4  | C5  | C6  | $0.02(18)$         |
| O1 | C2 | C3 | C8  | $\bar{179.45(12)}$ | C11 | C16 | C15 | C14 | $-1.09(17)$        |
| O1 | C2 | C3 | C4  | $-1.7(2)$          | C11 | C12 | C13 | F1  | $179.19(11)$       |
| N1 | C8 | C3 | C2  | $-1.49(13)$        | C11 | C12 | C13 | C14 | $-0.40(19)$        |
| N1 | C8 | C3 | C4  | $\bar{179.53(11)}$ | C9  | C11 | C16 | C15 | $179.99(10)$       |
| N1 | C8 | C7 | C6  | $179.14(12)$       | C9  | C11 | C16 | C17 | $1.15(16)$         |
| N1 | C1 | C9 | C11 | $-0.20(18)$        | C9  | C11 | C12 | C13 | $\bar{179.28(11)}$ |
| N1 | C1 | C9 | C10 | $179.03(11)$       | C16 | C11 | C9  | C1  | $92.36(14)$        |
| C8 | N1 | C1 | C2  | $-2.11(13)$        | C16 | C11 | C9  | C10 | $-86.89(14)$       |
| C8 | N1 | C1 | C9  | $177.60(11)$       | C16 | C11 | C12 | C13 | $0.04(18)$         |
| C8 | C3 | C4 | C5  | $0.18(17)$         | C16 | C15 | C14 | C13 | $0.74(18)$         |
| C8 | C7 | C6 | C5  | $0.39(18)$         | C7  | C8  | C3  | C2  | $177.94(11)$       |
| C2 | C1 | C9 | C11 | $179.45(11)$       | C7  | C8  | C3  | C4  | $-0.10(18)$        |
| C2 | C1 | C9 | C10 | $-1.32(18)$        | C7  | C6  | C5  | C4  | $-0.32(19)$        |
| C2 | C3 | C4 | C5  | $\bar{177.33(12)}$ | C12 | C11 | C9  | C1  | $-88.31(14)$       |
| C1 | N1 | C8 | C3  | $2.33(13)$         | C12 | C11 | C9  | C10 | $92.44(13)$        |
| C1 | N1 | C8 | C7  | $\bar{177.06(12)}$ | C12 | C11 | C16 | C15 | $0.68(16)$         |
| C1 | C2 | C3 | C8  | $0.21(12)$         | C12 | C11 | C16 | C17 | $\bar{178.16(11)}$ |
| C1 | C2 | C3 | C4  | $177.96(12)$       | C15 | C14 | C13 | F1  | $\bar{179.57(11)}$ |
| C3 | C8 | C7 | C6  | $-0.18(17)$        | C15 | C14 | C13 | C12 | $0.02(19)$         |
| C3 | C2 | C1 | N1  | $1.15(12)$         | C17 | C16 | C15 | C14 | $177.76(11)$       |

**Table S7. Hydrogen Atom Coordinates ( $\text{\AA} \times 10^4$ ) and Isotropic Displacement Parameters ( $\text{\AA}^2 \times 10^3$ ) for 2aI.**

| Atom | <i>x</i> | <i>y</i> | <i>z</i> | U(eq) |
|------|----------|----------|----------|-------|
| H7   | 6858.07  | 3440.02  | 5830.67  | 32    |
| H4   | 6791.01  | 6822.49  | 5002.25  | 32    |
| H12  | 493.86   | 4127.03  | 6164.17  | 34    |
| H15  | 1622.6   | 4068.99  | 8002.19  | 37    |
| H6   | 8698.63  | 3940.97  | 5206.99  | 36    |
| H14  | 30.86    | 2795.76  | 7640.81  | 39    |
| H5   | 8678.17  | 5600.62  | 4802.89  | 37    |
| H17A | 3947.89  | 5751.76  | 7374.22  | 48    |
| H17B | 3144.44  | 5592.44  | 7935.72  | 48    |
| H17C | 2516.88  | 6425.75  | 7517.94  | 48    |
| H1   | 4250(18) | 4091(13) | 6269(7)  | 35(4) |

### Experimental

Single crystals of  $\text{C}_{17}\text{H}_{11}\text{FN}_2\text{O}$  **2aI** were crystallized by slow evaporation of saturated solution in EtOAc. A suitable crystal was selected and mounted on the glass stick by acrylic glue on a SuperNova, Dual, Cu at home/near, AtlasS2 diffractometer. The crystal was kept at 100.00(10) K during data collection. Using Olex2 [S1], the structure was solved with the SHELXT [S2] structure solution program using Intrinsic Phasing and refined with the SHELXL [S3] refinement package using Least Squares minimisation.

### Crystal structure determination of 2aI

**Crystal Data** for  $\text{C}_{17}\text{H}_{11}\text{FN}_2\text{O}$  ( $M = 278.28$  g/mol): orthorhombic, space group Pbca (no. 61),  $a = 8.8927(3)$  Å,  $b = 12.5305(4)$  Å,  $c = 24.5955(10)$  Å,  $V = 2740.68(17)$  Å<sup>3</sup>,  $Z = 8$ ,  $T = 100.00(10)$  K,  $\mu(\text{Cu K}\alpha) = 0.783$  mm<sup>-1</sup>,  $D_{\text{calc}} = 1.349$  g/cm<sup>3</sup>, 15288 reflections measured ( $7.188^\circ \leq 2\theta \leq 152.588^\circ$ ), 2868 unique ( $R_{\text{int}} = 0.0215$ ,  $R_{\text{sigma}} = 0.0135$ ) which were used in all calculations. The final  $R_1$  was 0.0381 ( $I > 2\sigma(I)$ ) and  $wR_2$  was 0.0920 (all data).

### Refinement model description

Number of restraints - 0, number of constraints - unknown.

Details:

1. Fixed Uiso  
At 1.2 times of:  
All C(H) groups  
At 1.5 times of:  
All C(H,H,H) groups
- 2.a Aromatic/amide H refined with riding coordinates:  
C7(H7), C4(H4), C12(H12), C15(H15), C6(H6), C14(H14), C5(H5)
- 2.b Idealised Me refined as rotating group:  
C17(H17A,H17B,H17C)

This report has been created with Olex2, compiled on 2020.11.12 svn.r5f609507 for OlexSys. Please [let us know](#) if there are any errors or if you would like to have additional features.

## References

- S1. Dolomanov, O.V., Bourhis, L.J., Gildea, R.J, Howard, J.A.K. & Puschmann, H. (2009), *J. Appl. Cryst.* 42, 339-341.
- S2. Sheldrick, G.M. (2008). *Acta Cryst.* A64, 112-122.
- S3. Sheldrick, G.M. (2015). *Acta Cryst.* C71, 3-8.
